# Supplementary material for: Randomised multicentre clinical trial to evaluate voriconazole pre-emptive genotyping strategy in patients with risk of aspergillosis: vorigenipharm study protocol
Source: PubMed Central journal article supplement — BMJ Open. 2020 Oct 1;10(10):e037443. doi: 10.1136/bmjopen-2020-037443 (PMC7534724; doi:10.1136/bmjopen-2020-037443), 2020-10-01
Supplement: bmjopen-2020-037443.draft_revisions.pdf [file bmjopen-2020-037443.draft_revisions.pdf]

# BMJ Open

BMJ Open is committed to open peer review. As part of this commitment we make the peer review history of every article we publish publicly available.

When an article is published we post the peer reviewers' comments and the authors' responses online. We also post the versions of the paper that were used during peer review. These are the versions that the peer review comments apply to.

The versions of the paper that follow are the versions that were submitted during the peer review process. They are not the versions of record or the final published versions. They should not be cited or distributed as the published version of this manuscript.

BMJ Open is an open access journal and the full, final, typeset and author-corrected version of record of the manuscript is available on our site with no access controls, subscription charges or pay-per-view fees (<http://bmjopen.bmj.com>).

If you have any questions on BMJ Open's open peer review process please email [info.bmjopen@bmj.com](mailto:info.bmjopen@bmj.com)

# BMJ Open

## RANDOMISED MULTICENTRE CLINICAL TRIAL TO EVALUATE VORICONAZOLE PRE-EMPTIVE GENOTYPING STRATEGY IN PATIENTS WITH RISK OF ASPERGILLOSIS: VORIGENIPHARM STUDY PROTOCOL

|                               |                                                                                                                                                                                                                                                                                                                                                                                                                                                                                                                                                                                                                                                                                                                                                                                                                                                                                                                                                                                                                                                                                                                                                                                                                                                                                                                                                                                                                                                                                                                   |
|-------------------------------|-------------------------------------------------------------------------------------------------------------------------------------------------------------------------------------------------------------------------------------------------------------------------------------------------------------------------------------------------------------------------------------------------------------------------------------------------------------------------------------------------------------------------------------------------------------------------------------------------------------------------------------------------------------------------------------------------------------------------------------------------------------------------------------------------------------------------------------------------------------------------------------------------------------------------------------------------------------------------------------------------------------------------------------------------------------------------------------------------------------------------------------------------------------------------------------------------------------------------------------------------------------------------------------------------------------------------------------------------------------------------------------------------------------------------------------------------------------------------------------------------------------------|
| Journal:                      | <i>BMJ Open</i>                                                                                                                                                                                                                                                                                                                                                                                                                                                                                                                                                                                                                                                                                                                                                                                                                                                                                                                                                                                                                                                                                                                                                                                                                                                                                                                                                                                                                                                                                                   |
| Manuscript ID                 | bmjopen-2020-037443                                                                                                                                                                                                                                                                                                                                                                                                                                                                                                                                                                                                                                                                                                                                                                                                                                                                                                                                                                                                                                                                                                                                                                                                                                                                                                                                                                                                                                                                                               |
| Article Type:                 | Protocol                                                                                                                                                                                                                                                                                                                                                                                                                                                                                                                                                                                                                                                                                                                                                                                                                                                                                                                                                                                                                                                                                                                                                                                                                                                                                                                                                                                                                                                                                                          |
| Date Submitted by the Author: | 03-Feb-2020                                                                                                                                                                                                                                                                                                                                                                                                                                                                                                                                                                                                                                                                                                                                                                                                                                                                                                                                                                                                                                                                                                                                                                                                                                                                                                                                                                                                                                                                                                       |
| Complete List of Authors:     | <p>Monserrat Villatoro, Jaime; Hospital Universitario La Paz, Clinical Pharmacology Department<br/> García García, Irene; Hospital Universitario La Paz, Clinical Pharmacology Department<br/> Bueno, David; Hospital Universitario La Paz, Pediatric Oncology and Haematology Department<br/> de la Cámara, Rafael; Hospital Universitario de la Princesa, Haematology Department<br/> Estébanez, Miriam; Hospital Central de la Defensa Gómez Ulla, Internal Medicine Department<br/> López de la Guía, Ana; Hospital Universitario La Paz, Haematology Department<br/> Abad-Santos, Francisco; Hospital Universitario de la Princesa<br/> Antón, Cristina; Universidad Francisco de Vitoria, Health Technology Assessment Department<br/> Mejía, Gina; Hospital Universitario de la Princesa, Clinical Pharmacology<br/> Otero, María José; Hospital Central de la Defensa Gómez Ulla, Haematology Department<br/> Ramírez García, Elena; Hospital Universitario La Paz, Clinical Pharmacology Department; Universidad Autonoma de Madrid, Pharmacology Department<br/> Frías Iniesta, Jesús; Hospital Universitario La Paz, Clinical Pharmacology Department; Universidad Autonoma de Madrid, Pharmacology Department<br/> Carcas, Antonio; Hospital Universitario La Paz, Clinical Pharmacology; Universidad Autonoma de Madrid, Pharmacology Department<br/> Borobia, Alberto; Hospital Universitario La Paz, Clinical Pharmacology Department; Universidad Autonoma de Madrid, Pharmacology Department</p> |
| Keywords:                     | CLINICAL PHARMACOLOGY, INFECTIOUS DISEASES, Clinical trials < THERAPEUTICS                                                                                                                                                                                                                                                                                                                                                                                                                                                                                                                                                                                                                                                                                                                                                                                                                                                                                                                                                                                                                                                                                                                                                                                                                                                                                                                                                                                                                                        |
|                               |                                                                                                                                                                                                                                                                                                                                                                                                                                                                                                                                                                                                                                                                                                                                                                                                                                                                                                                                                                                                                                                                                                                                                                                                                                                                                                                                                                                                                                                                                                                   |

1  
2  
3  
4  
5  
6  
7  
8  
9  
10  
11  
12  
13  
14  
15  
16  
17  
18  
19  
20  
21  
22  
23  
24  
25  
26  
27  
28  
29  
30  
31  
32  
33  
34  
35  
36  
37  
38  
39  
40  
41  
42  
43  
44  
45  
46  
47  
48  
49  
50  
51  
52  
53  
54  
55  
56  
57  
58  
59  
60

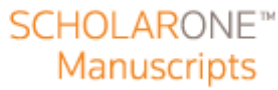

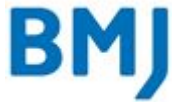

I, the Submitting Author has the right to grant and does grant on behalf of all authors of the Work (as defined in the below author licence), an exclusive licence and/or a non-exclusive licence for contributions from authors who are: i) UK Crown employees; ii) where BMJ has agreed a CC-BY licence shall apply, and/or iii) in accordance with the terms applicable for US Federal Government officers or employees acting as part of their official duties; on a worldwide, perpetual, irrevocable, royalty-free basis to BMJ Publishing Group Ltd ("BMJ") its licensees and where the relevant Journal is co-owned by BMJ to the co-owners of the Journal, to publish the Work in this journal and any other BMJ products and to exploit all rights, as set out in our [licence](#).

The Submitting Author accepts and understands that any supply made under these terms is made by BMJ to the Submitting Author unless you are acting as an employee on behalf of your employer or a postgraduate student of an affiliated institution which is paying any applicable article publishing charge ("APC") for Open Access articles. Where the Submitting Author wishes to make the Work available on an Open Access basis (and intends to pay the relevant APC), the terms of reuse of such Open Access shall be governed by a Creative Commons licence – details of these licences and which [Creative Commons](#) licence will apply to this Work are set out in our licence referred to above.

Other than as permitted in any relevant BMJ Author's Self Archiving Policies, I confirm this Work has not been accepted for publication elsewhere, is not being considered for publication elsewhere and does not duplicate material already published. I confirm all authors consent to publication of this Work and authorise the granting of this licence.

**TITLE: RANDOMISED MULTICENTRE CLINICAL TRIAL TO EVALUATE VORICONAZOLE PRE-EMPTIVE GENOTYPING STRATEGY IN PATIENTS WITH RISK OF ASPERGILLOSIS: VORIGENIPHARM STUDY PROTOCOL**

| <b>Data category</b>                             | <b>Information</b>                                                                                                                                                                                                                                                                                                                       |
|--------------------------------------------------|------------------------------------------------------------------------------------------------------------------------------------------------------------------------------------------------------------------------------------------------------------------------------------------------------------------------------------------|
| Primary registry and trial identification number | EU Clinical Trials Register<br><a href="https://www.clinicaltrialsregister.eu/ctr-search/search">https://www.clinicaltrialsregister.eu/ctr-search/search</a><br>2019-000376-41<br><br>ClinicalTrials.Gov<br><a href="https://clinicaltrials.gov/ct2/show/NCT04238884">https://clinicaltrials.gov/ct2/show/NCT04238884</a><br>NCT04238884 |
| Date of registration in primary registry         | 18 June 2019                                                                                                                                                                                                                                                                                                                             |
| Source(s) of monetary or material support        | Institute of Health Carlos III, grants for Health Research Project 2018 of Spain                                                                                                                                                                                                                                                         |
| Primary sponsor                                  | La Paz University Hospital Research Foundation (FIBHULP)                                                                                                                                                                                                                                                                                 |
| Contact for public queries                       | Alberto M. Borobia Perez, MD, PhD, La Paz University Hospital, Clinical Pharmacology Department, +34917277558, <a href="mailto:alberto.borobia@salud.madrid.org">alberto.borobia@salud.madrid.org</a>                                                                                                                                    |
| Contact for scientific queries                   | Alberto M. Borobia Perez, MD, PhD, La Paz University Hospital, Clinical Pharmacology Department, +34917277558, <a href="mailto:alberto.borobia@salud.madrid.org">alberto.borobia@salud.madrid.org</a>                                                                                                                                    |
| Public title                                     | Clinical trial to evaluate the effectiveness and efficiency of pre-emptive genotyping before treatment with voriconazole                                                                                                                                                                                                                 |
| Scientific title                                 | Randomised multicentre clinical trial to evaluate voriconazole pre-emptive genotyping strategy in patients with risk of aspergillosis: vorigenipharm study protocol                                                                                                                                                                      |
| Countries of recruitment                         | Spain                                                                                                                                                                                                                                                                                                                                    |
| Health condition(s) or problem(s) studied        | Fungal infectious disorders, neutropaenia, chemotherapy-induced neutropaenia, haematopoietic neoplasm, allogeneic peripheral haematopoietic stem cell transplant, autologous peripheral haematopoietic stem cell transplant                                                                                                              |
| Intervention(s)                                  | Pre-emptive genotyping plus post-serum levels vs sole post-serum level adjustment of voriconazole                                                                                                                                                                                                                                        |

|                                      |                                                                                                                                                                                                                                                                                                                                                                                                                                                                                                                                                     |
|--------------------------------------|-----------------------------------------------------------------------------------------------------------------------------------------------------------------------------------------------------------------------------------------------------------------------------------------------------------------------------------------------------------------------------------------------------------------------------------------------------------------------------------------------------------------------------------------------------|
| Key inclusion and exclusion criteria | Ages eligible for study: no limit<br>Sexes eligible for study: both<br>Accepts healthy volunteers: no<br>Inclusion criteria: children who are going to receive an HSCT and those who have diagnosis of acute myeloid leukaemia as well as its relapse. Adults diagnosed with acute leukaemia, with expected prolonged neutropaenia, and those with risk of developing a fungal infection.<br>Exclusion criteria: patients who for any reason should not be included in the study according to the criteria of the research team.                    |
| Study type                           | Interventional<br>Allocation: randomised<br>Intervention model: parallel assignment<br>Masking: single-blind (subject)<br>Primary purpose: prevention<br>Phase IV                                                                                                                                                                                                                                                                                                                                                                                   |
| Date of first enrolment              | January 2020                                                                                                                                                                                                                                                                                                                                                                                                                                                                                                                                        |
| Target sample size                   | 146                                                                                                                                                                                                                                                                                                                                                                                                                                                                                                                                                 |
| Recruitment status                   | Not started                                                                                                                                                                                                                                                                                                                                                                                                                                                                                                                                         |
| Primary outcome(s)                   | Serum voriconazole concentration within the therapeutic range.                                                                                                                                                                                                                                                                                                                                                                                                                                                                                      |
| Key secondary outcomes               | Therapeutic failure and adverse events. Dose-related adverse events associated with treatment                                                                                                                                                                                                                                                                                                                                                                                                                                                       |
| Ethics Review                        | Status: Approved.<br>Date of approval: June 6th 2019 and June 18th 2019.<br>Name and contact details of Ethics committee(s): approved by 'La Paz' University Hospital Ethics Committee and the Spanish Drugs and Health Products Agency, respectively.                                                                                                                                                                                                                                                                                              |
| IPD sharing statement                | Plan to share IPD (Yes, No): Yes.<br>Plan description:<br>A copy of the database of data collected during the clinical trial will be attached as an appendix to the publication resulting from this clinical trial.<br>This data will be available at the same time as the results will be published, and will be kept available to everyone without any time limit. Data will be available indefinitely on the publisher's website, as long as it is kept by the Publisher, for anyone who wishes to access the data, for non-commercial purposes. |

**AUTHORS**

Jaime Monserrat-Villatoro, MD †  
Clinical Pharmacology Department  
La Paz University Hospital, IdiPAZ

Irene Garcia, MD †  
Clinical Pharmacology Department  
La Paz University Hospital, IdiPAZ

David Bueno, MD, PhD  
Paediatric Onco-Haematology Department  
La Paz University Hospital, IdiPAZ

Rafael de la Camara, MD, PD  
Haematology Department  
La Princesa University Hospital

Miriam Estébanez, MD, PhD  
Infectious Diseases, Internal Medicine Department  
Gómez Ulla Hospital  
University of Alcalá de Henares

Ana Lopez, MD, PhD  
Haematology Department  
La Paz University Hospital

Francisco Abad Santos, MD, PhD  
Clinical Pharmacology Department  
La Princesa University Hospital  
Autonomous University of Madrid

Cristina Antón, MD, PhD  
Health Technologies Assessment Department  
Francisco de Vitoria University

Gina Mejia, MD, PhD  
Clinical Pharmacology Department  
La Princesa University Hospital

María José Otero, MD, PhD  
Haematology Department  
Gómez Ulla Hospital

Elena Ramírez, MD, PhD  
Clinical Pharmacology Department  
La Paz University Hospital. IdiPAZ  
Autonomous University of Madrid

Jesús Frías Iniesta, MD, PhD  
Clinical Pharmacology Department  
La Paz University Hospital, IdiPAZ  
Autonomous University of Madrid

1  
2 Antonio J. Carcas, MD, PhD \*  
3 Clinical Pharmacology Department  
4 La Paz University Hospital, IdiPAZ  
5 Autonomous University of Madrid  
6

7 Alberto M. Borobia, MD, PhD \*  
8 Clinical Pharmacology Department  
9 La Paz University Hospital, IdiPAZ  
10 Autonomous University of Madrid  
11 Spanish Clinical Research Network (SCReN)  
12

13 † Equal contribution

14 \* Corresponding authors  
15  
16  
17  
18

### 19 **Corresponding author**

20  
21 Alberto M. Borobia, Antonio J. Carcas  
22 Clinical Pharmacology Department  
23 La Paz University Hospital  
24 Paseo de la Castellana, 261  
25 28046-Madrid  
26 Telephone and FAX: +34-912071466  
27 Mail: [alberto.borobia@salud.madrid.org](mailto:alberto.borobia@salud.madrid.org); [antonio.carcas@uam.es](mailto:antonio.carcas@uam.es)  
28  
29  
30

### 31 **WORD COUNTS**

32 Main text: 2027 words

33 Abstract: 277 words  
34  
35  
36  
37  
38  
39  
40  
41  
42  
43  
44  
45  
46  
47  
48  
49  
50  
51  
52  
53  
54  
55  
56  
57  
58  
59  
60



## ABSTRACT

**Introduction:** Invasive aspergillosis is the most important cause of morbimortality in patients with haematological diseases. At present, voriconazole is the first-line treatment for invasive fungal disease. The pharmacokinetic interindividual variability of voriconazole depends on genetic factors. CYP450 is involved in 70%–75% of total metabolism of voriconazole, mainly CYP3A4 and CYP2C19, with the remaining 25%–30% of metabolism conducted by monooxygenase flavins. CYP2C19 single nucleotide polymorphisms could explain 50%–55% of variability in voriconazole metabolism.

**Materials and Methods:** The main objective is to compare efficiency of pre-emptive voriconazole genotyping with routine practice. The primary outcome is serum voriconazole on the fifth day. The secondary outcome is the combined variables of therapeutic failure and adverse events associated with voriconazole. A total of 146 patients at risk of invasive aspergillosis who will potentially receive voriconazole will be recruited, and CYP2C19 will be genotyped. If the patient ultimately receives voriconazole, they will be randomised (1:1 experimental/control). In the experimental arm, patients will receive a dose according to a pharmacogenetic algorithm, including CYP2C19 genotype and clinical and demographic information. In the control arm, patients will receive a dose according to clinical practice guidelines. In addition, a Spanish National Healthcare System (NHS) point-of-view cost-effectiveness evaluation will be performed. Direct cost calculations for each arm will be performed.

**Conclusion:** This trial will provide information about the viability and cost-effectiveness of the implementation of a pre-emptive voriconazole genotyping strategy in the Spanish NHS.

**Ethics and dissemination:** A Spanish version of this protocol has been evaluated and approved by the La Paz University Hospital Ethics Committee and the Spanish Agency of Medicines and Medical Devices. Trial results will be submitted for publication in an open peer-reviewed medical speciality-specific publication. Eudra-CT: 2019-000376-41. ClinicalTrials: NCT04238884

## STRENGTHS AND LIMITATIONS OF THIS STUDY

- (1) The study will be randomised, with objective variables and not influenced by placebo effect (voriconazole serum level).
- (2) The effectiveness and safety related to serum voriconazole is well known.
- (3) For patients in this study, there is little risk compared with routine clinical practice.
- (4) The study is single-blinded.
- (5) Our results depend on the frequency of CYP2C19 polymorphism.

## INTRODUCTION:

Invasive aspergillosis is the most important cause of morbimortality in patients with haematological diseases. The main risk groups are patients with severe and the prolonged neutropenia induced by chemotherapy drugs, patients with acute leukaemia, and those who receive haematopoietic stem cells transplants. The most recent epidemiologic studies show an incidence of probable or confirmed invasive aspergillosis in patients with high-risk haematological diseases of 6%–11% [1][2]. Mortality due to this complication in patients with acute leukaemia is 27% [1], and up to 40% if we include every malignant haematologic disease [3]. In recent years, great advances in the treatment of this pathology have been made, which have improved the prognosis of haematologic diseases. However, high morbidity and mortality associated with infectious complications continue to be a medical problem. As a result, improving the prognosis for invasive fungal disease has great scientific interest, with aspergillosis being the most prevalent form.

At present, voriconazole is the first-line treatment for invasive fungal disease (1-grade evidence, A-grade recommendation) [4][5]. It is a third-generation triazole antifungal for. Achieving voriconazole serum levels in the therapeutic range during the first treatment week improves the prognosis of fungal infection and the tolerability of the treatment by reducing dose-dependent adverse effects (AEs) [6]. The AE reduction, associated with posology optimization, decreases the amount of withdrawals of this antifungal drug.

Knowledge of the genetic factors that explain a part — very relevant in some cases — of the variability in response to drugs has been exponentially boosted by important advances in the field of genetics made in recent years. Pharmacogenetics and pharmacogenomics have become established as disciplines of great importance in medical knowledge. The therapeutic effect of a drug relies largely on pharmacokinetic and pharmacodynamic processes, which might be simultaneously regulated by other physiological or pathological systems. All these processes involve proteins, enzymes, receptors and transporters, among others, whose expression is genetically coded. Various degrees of activity or function can be presented by these genes, affecting the behaviour of the drug in terms of efficacy and safety. According to this approach, these genetic variations could become markers that help us predict the pharmacological response depending on whether they are present and on their interrelationship with other markers associated with clinical response. In recent years, several groups and organisations have published evidence assessment systems, guidelines, systematic reviews and evaluations for various drugs and pathologies; in some cases, genotyping prior to treatment with various drugs has been shown to be cost-efficient (Plumpton, 2016). The drug regulatory agencies, such as the United States Food and Drug Administration and the European Medicines Agency, include pharmacogenetic information in the summaries of specific drugs. Thus,

1 we can find basic information about the genotype-phenotype relationship for authors or groups that  
2 request the highest methodological rigor (including clinical trials) to recommend a pharmacogenetic  
3 test. In addition to this evidence, the individualisation of treatment must be performed through an  
4 expert interpretation of the interaction between pharmacogenetics and other aspects  
5 (pharmacokinetics, patient demographics, interactions, etc.).  
6  
7  
8  
9

10 Focusing on voriconazole, its pharmacokinetic interindividual variability depends on genetic factors  
11 [15]. CYP450 is involved in 70%–75% of the total metabolism of voriconazole, mainly CYP3A4 and  
12 CYP2C19, with the remaining 25%–30% of metabolism conducted by monooxygenase flavins.  
13 CYP2C19 single nucleotide polymorphisms could explain 50%–55% of variability in voriconazole  
14 metabolism. Some 5%–17% of patients are ultrafast metabolisers (CYP2C19\*17/\*17), and  
15 approximately 25%–33% of patients are fast metabolisers (CYP2C19\*1/\*17). Both are associated  
16 with a high risk of not achieving therapeutic levels for invasive aspergillosis [16][17].  
17 Pharmacogenetics information oriented to dose adjustment is present in European dosing guidelines  
18 and in FDA recommendations, in which recommendations are given according to genotype [15]. This  
19 information must be known by every physician in order to reduce adverse effects, improve  
20 effectiveness and thus raise patient compliance by reducing morbidity and mortality.  
21  
22  
23  
24  
25  
26  
27  
28

29 We propose a pragmatic clinical trial to evaluate the effectiveness and efficiency of a pre-emptive  
30 genotyping strategy of biomarkers related to the voriconazole response in patients with  
31 haematological disease who are at risk of suffering an infection susceptible to treatment with  
32 voriconazole.  
33  
34  
35  
36

## 37 **METHODS AND ANALYSIS**

### 38 **Study design**

39 VORIGENIPHARM is an acronym (VORIconazole PHARMacoGENetics) of the clinical trial with  
40 code EUDRA-CT: 2019-000376-41, funded by the Spanish Health Research and Development  
41 Strategy. It is a phase IV pragmatic, multicentre, randomised, single-blind, parallel arm, centre-  
42 stratified clinical trial. A total of 146 patients at risk of invasive aspergillosis who will potentially  
43 receive voriconazole will be recruited, and CYP2C19 alleles will be genotyped. The patients who  
44 ultimately receive voriconazole will be randomised to receive the dose according to a  
45 pharmacogenetic algorithm, including the CYP2C19 genotype and clinical and demographic  
46 information, or according to clinical practice (Figure 1).  
47  
48  
49  
50  
51  
52  
53  
54  
55  
56  
57  
58  
59  
60

## Study objectives

### Primary objective:

Evaluating the effectiveness and efficiency of a pre-emptive genotyping strategy for voriconazole in treatment and prophylaxis of *Aspergillus* fungal infections in patients with haematological diseases.

### Secondary objectives:

- Evaluate the effectiveness of a pre-emptive genotyping strategy for voriconazole in achieving adequate therapeutic levels in haematological patients at risk of fungal infection compared with routine clinical practice.
- Evaluate the efficacy and safety of pre-emptive genotyping of voriconazole in haematological patients at risk of fungal infection, comparing it with routine clinical practice.
- Evaluate the efficiency of this pre-emptive genotyping strategy.

## Eligibility

The patient will be selected from La Paz University Hospital Paediatrics Hemato-Oncology Department, La Paz University Hospital Haematology Department, La Princesa University Hospital Adult Hematology Department and Gomez-Ulla University Hospital Adult Hematology Department. They will include children and adults who meet the following inclusion criteria:

- 1) Risk of developing invasive aspergillosis who are potentially eligible for treatment or prophylaxis with voriconazole:
  - a. Paediatric population: children undergoing haematopoietic stem cell transplantation, with acute myeloid leukaemia, as well as their relapses.
  - b. Adult population: patients diagnosed with acute leukaemia and those with long-term expected neutropaenia secondary to haematological disease and/or undergoing specific treatment (e.g., aplastic anaemia and variants, myelodysplastic syndrome, solid organ or bone marrow transplantation), and patients who the clinician in charge considers might be at risk of developing fungal infection.
- 2) Accepting participation in the study by signing the informed consent (adult patients), or minor patients whose representative/legal guardian has willingly signed the informed consent. In the case of mature minors (12–17 years of age), in addition to the consent signed by the legal guardian, the minor's assent shall be obtained.

The exclusion criteria are as follows:

- 1) Patients who for any reason should not be included in the study as assessed by the research team.
- 2) Patients who are not capable of understanding the information form and are unable to sign the informed consent document.

All patients eligible to receive voriconazole will sign an informed consent document for their participation in the clinical trial and for the collection of blood samples destined for genetic studies. They will also be asked for their consent to store an aliquot of their DNA for future studies (i.e., mass sequencing). Patients identified in this phase will be randomised if and when they receive voriconazole.

## Randomisation

Patients who meet all inclusion and no exclusion criteria, who have signed the informed consent and will receive voriconazole will be randomised, stratified by centres. The randomisation sequence was created using SAS version 9.4 statistical software (procedure 'PROC PLAN') with a 1:1 allocation. No randomisation seed was specified. The randomisation seed was generated taking the hour of the computer where the program was executed. Randomization will be done centrally through the electronic CRF (MACRO®) in order to conceal the sequence until interventions are assigned.

## Masking

The study is single blind, and under no circumstance does the patient know the group to which they have been assigned. The medical researchers are unaware of the randomization scheme. Although there is a risk of unmasking the patient, and the lack of masking for the physician could affect the evaluation variables, we believe that in this clinical trial is permissible since the primary variable is an objective one (voriconazol concentration), and a total masking is not feasible in a study using a pragmatic approach.

## Outcomes

### Primary outcome

Serum voriconazole levels on the fifth day, which is a subrogated variable strongly related to effectiveness and safety, with high-level evidence. According to the British Society for Medical Mycology, serum levels should be in the range of 1–5.5 µg/mL [6].

### Secondary outcomes

- A combined variable of therapeutic failure and AEs.
  - Therapeutic failure is defined as the following:

- Patients with suspected or confirmed invasive aspergillosis: drug change or association because of poor clinical or radiological evolution of the disease.
  - Patients who received prophylactic treatment: the necessity of change because of suspected or confirmed invasive fungal disease.
  - Adverse event: Dose-dependent drug AEs, including visual disturbances (e.g., photopsia), skin reactions, neurotoxicity (e.g., confusion and visual hallucinations) and QTc lengthening.
- Costs by AE
  - Cost savings by AE
  - Quality-adjusted life years.

## Study procedures

The study visits and procedures will be performed as shown in Figures 1 and 2.

- Selection visit: After confirming the selection criteria, informing the patient and signing the informed consent document, a blood sample will be taken for genetic analysis. Patients who have not received voriconazole within 3 months of recruitment will not be considered for randomisation, but will be considered for economic evaluation. Patients who, in this 3-month period, receive voriconazole will continue to the randomisation visit.
- Randomisation visit: The patient will be randomised to one of the two branches of the study:
  - Experimental group: based on the genetic study performed and the patient's characteristics (age, weight, indication), the Pharmacogenetics Unit of La Paz University Hospital will indicate the dose to be administered. The dose will be based on the therapeutic individualisation protocol guided by pharmacogenetics, as agreed by all clinical services, and which includes the recommendations of the Clinical Pharmacogenetics Implementation Consortium guide (Moriyana, 2016) and the study by Hicks et al (Hicks, 2014). In the experimental group arm, in cases of patients with rapid, ultrafast or slow metaboliser phenotypes, a determination of serum voriconazole concentrations at 48 hours (+/- 24 hours) may be considered, which will make a dose adjustment possible if required.
  - Control group: No information will be provided and the procedure will be performed according to normal clinical practice, with clinical monitoring by the doctor in charge. In both cases, the request for serum voriconazole levels for subsequent dose adjustment will be recommended, as is standard clinical practice, in accordance with the recommendations of the British Society for Medical Mycology (Ashbee, 2014).

- 1  
2  
3  
4  
5  
6  
7  
8  
9  
10  
11  
12  
13  
14  
15  
16  
17  
18  
19  
20  
21  
22  
23  
24  
25  
26  
27  
28  
29  
30  
31  
32  
33  
34  
35  
36  
37  
38  
39  
40  
41  
42  
43  
44  
45
- Primary outcome evaluation visit: Voriconazole concentrations will be measured on no later than the fifth day after the start of treatment ( $\pm 1$  day); if a dose adjustment is necessary, this will be performed according to the criteria of the attending clinician (control group) or the Pharmacogenetic Unit (experimental group); subsequent monitoring (determination of concentrations and dose adjustment) will be performed according to the criteria of the attending clinician in both arms.
  - Follow-up visits: While the patient is being treated with voriconazole, follow-up visits will be made according to clinical criteria, and the following information will be recorded:
    - Evaluation of potential voriconazole-related clinical AEs (see evaluation variables). This will be performed by asking the patient questions, performing a physical examination, routine tests (including liver enzymes) and an electrocardiogram.
    - Voriconazole levels, if requested according to medical criteria.
    - The type of consultation will be recorded: outpatient appointment, urgent episode, admission, readmission or phone call.
  - End-of-treatment visit: Performed on the last day the patient receives treatment with voriconazole, including the following procedures:
    - A reason for the end of treatment will be indicated (withdrawal due to toxicity or therapeutic failure, or after completion of treatment according to clinical criteria of efficacy)
    - Evaluation of potentially voriconazole-related clinical adverse events, as in follow-up visits.
    - If the patient continues voriconazole treatment beyond 3 months, the end of study visit will be made at that time.
  - End-of-study visit: the end-of-study visit will coincide with the end-of-treatment visit, except for those patients who are still undergoing treatment after 3 months. A safety analysis, electrocardiogram, and assessment of adverse events will be performed. Patients who continue treatment beyond this visit will be followed according to routine clinical practice.

### **Voriconazole genotyping and therapeutic drug monitoring**

46  
47  
48  
49  
50  
51  
52  
53  
54  
55  
56  
57  
58  
59  
60

Genotyping will be performed at the Institute of Medical and Molecular Genetics at La Paz University Hospital using the self-designed SNP-array device (PharmArray v.2.), which makes genotyping of 180 relevant mutations possible for predicting the response to drugs. Among these mutations are the most relevant variants of CYP2C19, a gene that is related to serum levels of voriconazole, with a level of evidence 1A of CPIC: CYP2C19\*2 (rs4244285), CYP2C19\*3 (rs4986893) and CYP2C19\*17 (rs12248560).

1  
2 Serum voriconazole determinations will be tested at the Therapeutic Drug Monitoring Laboratory of  
3 the Clinical Pharmacology Service at La Paz University Hospital using an enzyme immunosensing  
4 technique on the Abbott ARCHITECT c4000 autoanalyser.  
5  
6  
7

### 8 **Data collection and outcome measures**

9  
10 A electronic case report form has been designed using MACRO Electronic Data Capture by Elsevier.  
11 This system will anonymise patients, and the data will be transferred to a '\*.csv' file in order to  
12 analyse it with R software (3.5.2 version or newer). To ensure the quality of the data, Data  
13 management will be performed by the Spanish Clinical Research Network (SCReN). Data  
14 management plan have been approved by the principal investigator and the sponsor. Data collection  
15 forms will be included in the final report.  
16  
17  
18  
19  
20

### 21 **Sample size calculation**

22  
23 In routine clinical practice, 43% of patients have voriconazole serum levels in the therapeutic range  
24 on the fifth day of treatment. We expect this to improve to 68%, based on the Hicks article [19]. With  
25 a two-tailed type I error of 0.05 and 80% power, it is necessary to recruit 62 patients to receive  
26 treatment in both arms. 85 out of every 100 patients recruited are estimated to will receive  
27 voriconazole, we will need a total of 146 patients from whom we obtain informed consent. This  
28 calculation has been performed with the 'power.prop.test' package, from R version 3.2.0. The  
29 necessary time to recruit the whole group is estimated to be 2 years. We estimate 20% of the patients  
30 will be selected from the La Princesa University Hospital Adult Haematology Department, and 20%  
31 from the Gomez-Ulla University Hospital Adult Haematology Department. The rest of group will be  
32 recruited from La Paz University Hospital. Since it is a phase IV clinical trial including patients that  
33 are usually followed in the hospital, with pragmatic selection criteria, it is not necessary to plan any  
34 strategy for achieving adequate participant enrolment.  
35  
36  
37  
38  
39  
40  
41  
42  
43

### 44 **Statistical analysis**

45  
46 Frequency results will be expressed in absolute terms, as percentages and confidence intervals.  
47 Continuous variables will be expressed as mean (SD) and median (range) according to Kolmogorov  
48 Smirnov's test of normality.  
49  
50  
51

52 For the main dichotomous variable (level of voriconazole within the therapeutic range) a generalised  
53 logistic model will be used. After that, "elastic net" techniques will be employed with the purpose of  
54 selecting variables so that they are not as rigid as in Lasso's case. Variables with some degree of  
55 correlation between themselves will be accepted in the model, as in Ridge regression, aiming at the  
56 best possible predictive model. Finally, more advanced methods of statistical learning will be used  
57 to give the variables consistency by the method described above. Predictive ability will be calculated  
58  
59  
60



1  
2 using receiver operating characteristic curves both at a specific time and over the course of the  
3 patient's follow-up.  
4

5  
6 A survival analysis will be performed for the secondary variables to test the Cox proportional hazards  
7 model and the Weibull model, analysing the time until the first event, using Kaplan Meier curves. A  
8 penalised Cox regression will be fitted to determine whether there are differences from the start of  
9 the target drug to the appearance of the event (secondary variable) between the control group and  
10 the experimental group, and finally, if possible the Weibull model will be used. A cross-validation  
11 approach will be used, dividing the sample into k subgroups. Later, a subgroup analysis will be  
12 performed taking into consideration the recruiting centre, calculating the *a posteriori* analysis power  
13 of every objective, given that this can be a source of hypothesis generation for future research lines.  
14  
15

16  
17 The analysis of the primary variable of efficacy will be made on an intention-to-treat (ITT) basis. It  
18 will include all the patients who are randomized, whether they have received the study treatment or  
19 not. The safety analyses will be held in the safety population, which includes patients who receive at  
20 least one dose of the drug during the study. No interim analysis or stopping rules will be carry out in  
21 this clinical trial.  
22  
23

24  
25 A bilateral significance level of 0.05 and bilateral 95% confidence intervals will be assumed. The  
26 statistical software R (R Core Team [2014]) will be used. R: A language and environment for  
27 statistical computing. R Foundation for Statistical Computing, Vienna, Austria.  
28  
29

### 30 **Economic evaluation**

31  
32 A Spanish National Healthcare Service (NHS) point-of-view cost-effectiveness evaluation will be  
33 performed. Direct cost calculations for each arm will be performed.  
34

35  
36 Direct costs will be calculated for both alternatives by registering healthcare resources used during  
37 the follow-up and the unit cost per patient, as well as the costs incurred by the centres to implement  
38 the intervention.  
39  
40

41  
42 The use of resources and their unit costs, such as doctor's visits, medications and any interventions  
43 performed on those patients in the hospital during follow-up shall be recorded. Costs for each patient  
44 for each intervention group will be totalled. This calculation will allow us to compare the average cost  
45 per event avoided between the intervention group and the control group. The results will be  
46 expressed in cost per event and avoided events. As far as possible, the utility of each intervention  
47 should be calculated.  
48  
49

50  
51 A univariate and a probabilistic sensitivity analysis will be performed to assess the uncertainty about  
52 the model and the unit costs, if they are obtained from a source other than the clinical centres.  
53  
54  
55  
56  
57  
58  
59  
60

## **Data monitoring**

Coordination, management, monitoring, data management and statistical analysis of the study will be performed by the Spanish Clinical Research Network (SCReN).

## **Auditing**

During the progress of the study, audit visits can be conducted at the participating centres. The investigator will allow direct access to the source data/documents for monitoring, auditing, review by the ethical research committee and inspection by the Health Authorities

## **Funding**

This clinical trial has been funded by the Instituto de Salud Carlos III (ISCIII), Minister of Innovation and Science of Spain in a competitive and public grant (Research Projects 2018, Spanish Health Research and Development Strategy). Project code: PI18/01322.

## **Conflicts of Interest**

The Funders and Sponsor not interfere in the selection processes of the patients, analysis of the data and/or publication of the results, or any other process that might come into play with the results of the study. Funding will be independent of the results of the study. The Principal Investigator has ultimate authority over any of these activities.

## **Patient and Public Involvement**

The development of the research question and outcome measures were based on the oncologists' experience treating this profile of patients the desire to optimize voriconazol treatment. Patients and patient advisers were not involved in the design, recruitment or conduct of this study. The patients or their families will be notified of the study results in writing and verbally, and we will invite them to help us develop our dissemination strategy.

## **Access to data.**

This section is included in the data sharing plan.

## **Dissemination policy**

Outputs from this study will include journal publications, conference presentations and community reporting. Outputs will not identify participants.

## **Ethical considerations**

1  
2 The researchers will adhere strictly to the provisions of this protocol and will complete the case report  
3 forms. The study will be performed according to the recommendations for clinical studies and the  
4 evaluation of drugs in humans, as contained in the Declaration of Helsinki (revised in successive  
5 world assemblies) and in the current Spanish and European legislation on clinical studies and patient  
6 data confidentiality. The study will follow the principles of Good Clinical Practice. This study has been  
7 approved by the Clinical Research Ethics Committee of La Paz University Hospital (Madrid, Spain)  
8 and by the Spanish Agency of Medication and Health Products, and has been registered in Eudra  
9 CT (Eudra CT: 2019-000376-41) and ClinicalTrials.gov (NCT04238884).

15 This clinical trial has been classified by the Spanish Agency for Medicines and Healthcare Products  
16 as a "low-intervention clinical trial". The additional diagnostic or monitoring procedures do not pose  
17 more than minimal additional risk or burden to the safety of the subjects compared to normal clinical.  
18

21 No additional use of the system for compensation shall be required from the sponsor for low-  
22 intervention clinical trials. If any possible damage that could be suffered by a subject, resulting from  
23 the use of the investigational medicinal product in accordance with the protocol of that specific clinical  
24 trial, it is covered by the applicable compensation system already in place.  
25

29 All protocol amendments will be evaluated by the Ethics Committee and the Spanish Agency of  
30 Medication and Health Products, following the principles of Good Clinical Practice and national  
31 legislation.  
32

## 35 **DISCUSSION**

37 Some important barriers have been detected to implementation of pharmacogenetics in usual clinical  
38 practice. The reasons detected in the literature include the difficulty of obtaining high-level evidence  
39 on genetic markers' efficacy, effectivity and efficiency, and a lack of consensus. Another problem is  
40 the absence of pharmacogenetic techniques' formation and its interpretation. We also have to  
41 consider the financial, logistic and legal limitations. Finally, there is no specific implementation  
42 strategy in clinical practice. There have been two proposed models for the implementation of  
43 pharmacogenetics biomarkers in usual clinical practice:  
44  
45  
46  
47  
48

- 49 ● Case-to-case model: The decision is made individually and is based on the need for using a  
50 drug whose effectiveness or safety is modified by specific genetics variations. The limitations  
51 are the costs and the latency between sample extraction and the results obtained.  
52
- 53 ● Pre-emptive genotyping model: This alternative assesses the patient's genetic information at  
54 the very beginning, even before starting treatment. Currently, the development of arrays  
55 permits detection of a significant number of mutations in which therapeutic impact is probable  
56 or definite. Other authors have developed a similar strategy [10][11], for instance St. Jude's  
57 Hospital [12], as well as our group [13]. Rasmussen-Torvik's group has proposed the  
58  
59  
60

1  
2 eMERGE-PGx project, in which pre-emptive pharmacogenotyping is integrated with clinical  
3 history [14].  
4  
5

6 In the case of voriconazole, several studies have linked CYP2C19 polymorphism to the response.  
7 In addition, some studies have shown that genotyping CYP2C19 is effective. The cost-efficiency of  
8 pre-treatment genotyping in some drugs has been already demonstrated in some articles [7];  
9 however, there is no evidence of voriconazole efficiency specifically in the Spanish NHS, or even  
10 whether voriconazole-related cytochrome genotyping is efficient in other countries.  
11  
12  
13  
14

15 This pragmatic clinical trial is proposed by our group to evaluate effectiveness and efficiency of pre-  
16 emptive biomarker genotyping and its interpretation by a Pharmacogenetic Unit for patients with  
17 haematological diseases and a risk of fungal infection, who are susceptible to receiving voriconazole  
18 treatment. If our hypothesis is proven, this strategy will help us improve the prevention and treatment  
19 of this infectious complication. This trial will provide information about the viability of the translation  
20 of this strategy to routine clinical practice. In addition, our pre-emptive pharmacogenetic strategy,  
21 combined with therapeutic drug monitoring, has the potential to improve efficacy and safety, with a  
22 high level of evidence [6], lowering the likelihood of AE occurrences.  
23  
24  
25  
26  
27  
28

## 29 **AUTHOR CONTRIBUTIONS**

30 All authors conceptualized and contributed to the study design and reviewed and revised this article.  
31  
32 AMB supervised the study design and takes responsibility for the paper as a whole.  
33  
34  
35

36 All authors attest to meeting the four ICMJE.org authorship criteria: (1) Substantial contributions to  
37 the conception or design of the work; or the acquisition, analysis, or interpretation of data for the  
38 work; AND (2) Drafting the work or revising it critically for important intellectual content; AND (3)  
39 Final approval of the version to be published; AND (4) Agreement to be accountable for all aspects  
40 of the work in ensuring that questions related to the accuracy or integrity of any part of the work are  
41 appropriately investigated and resolved.  
42  
43  
44  
45  
46  
47  
48  
49  
50  
51  
52  
53  
54  
55  
56  
57  
58  
59  
60

**REFERENCES:**

- [1] Koehler P et al. Epidemiology of invasive aspergillosis and azole resistance in patients with acute leukaemia: the SEPIA Study. *Int J Antimicrob Agents*. 2017 Feb;49(2):218-223. doi: 10.1016/j.ijantimicag.2016.10.019
- [2] Lestrade PP et al. Epidemiology of invasive aspergillosis and triazole-resistant *Aspergillus fumigatus* in patients with haematological malignancies: a single-centre retrospective cohort study. *J Antimicrob Chemother*. 2018 Jan 31. doi: 10.1093/jac/dkx527
- [3] Pagano L et al. The epidemiology of fungal infections in patients with hematologic malignancies: the SEIFEM-2004 study. *Haematologica*. 2006 Aug;91(8):1068-75.
- [4] Fortún J et al. Recomendaciones sobre el tratamiento de la enfermedad fúngica invasiva por *Aspergillus* spp. y otros hongos filamentosos de la Sociedad Española de Enfermedades Infecciosas y Microbiología Clínica (SEIMC). Actualización 2011. *Enferm Infecc Microbiol Clin*. 2011;29(6):435-454
- [5] Patterson TF et al. Practice Guidelines for the Diagnosis and Management of Aspergillosis: 2016 Update by the Infectious Diseases Society of America. *CID* 2016:63
- [6] Ashbee HR et al. Therapeutic drug monitoring (TDM) of antifungal agents: guidelines from the British Society for Medical Mycology. *J Antimicrob Chemother*. 2014 May;69(5):1162-76. doi: 10.1093/jac/dkt508. Epub 2013 Dec 29
- [7] Plumpton, C., Roberts, D., Pirmohamed, M. and Hughes, D. (2016). A Systematic Review of Economic Evaluations of Pharmacogenetic Testing for Prevention of Adverse Drug Reactions. *PharmacoEconomics*, 34(8), pp.771-793.
- [8] Roberts J, Wells G, Le May M, Labinaz M, Glover C, Froeschl M et al. Point-of-care genetic testing for personalisation of antiplatelet treatment (RAPID GENE): a prospective, randomised, proof-of-concept trial. *The Lancet*. 2012;379(9827):1705-1711.
- [9] Johnson J, Burkley B, Langae T, Clare-Salzler M, Klein T, Altman R. Implementing Personalized Medicine: Development of a Cost-Effective Customized Pharmacogenetics Genotyping Array. *Clinical Pharmacology & Therapeutics*. 2012;92(4):437-439.
- [10] Pulley, J.M. et al. Operational implementation of prospective genotyping for personalized medicine: the design of the Vanderbilt PREDICT project. *Clin. Pharmacol. Ther* 2012; 92:87 -95;

- 1  
2 [11] Bielinski S, Olson J, Pathak J, Weinshilboum R, Wang L, Lyke K et al. Preemptive Genotyping  
3 for Personalized Medicine: Design of the Right Drug, Right Dose, Right Time—Using Genomic Data  
4 to Individualize Treatment Protocol. *Mayo Clinic Proceedings*. 2014;89(1):25-33.  
5  
6  
7  
8 [12] Crews KR et al. Pharmacogenomics and Individualized Medicine: Translating Science Into  
9 Practice. *Clin Pharmacol Ther* 2012; 92:467-75  
10  
11  
12 [13] Borobia AM. et al (2017), Clinical Implementation of Pharmacogenetic Testing in a Hospital of  
13 the Spanish National Health System: Strategy and Experience Over 3 Years. *Clinical And*  
14 *Translational Science*. doi:10.1111/cts.12526  
15  
16  
17  
18 [14] Rasmussen-Torvik LJ et al. Design and anticipated outcomes of the eMERGE-PGx project: a  
19 multicenter pilot for preemptive pharmacogenomics in electronic health record systems. *Clin*  
20 *Pharmacol Ther*. 2014 Oct;96(4):482-9. doi: 10.1038/clpt.2014.137.  
21  
22  
23  
24 [15] Moriyama B, et al. Clinical Pharmacogenetics Implementation Consortium (CPIC) Guidelines  
25 for CYP2C19 and Voriconazole Therapy. *Clin Pharmacol Ther*. 2016 Dec 16. doi: 10.1002/cpt.583.  
26  
27  
28 [16] Hicks JK et al. Voriconazole plasma concentrations in immunocompromised pediatric patients  
29 vary by CYP2C19 diplotypes. *Pharmacogenomics*. 2014 Jun;15(8):1065-78  
30  
31  
32  
33 [17] Dapía I, García I, Martínez J, Arias P, Guerra P, Díaz L et al. Prediction Models for Voriconazole  
34 Pharmacokinetics Based on Pharmacogenetics: An Exploratory Study in Spanish population.  
35 *International Journal of Antimicrobial Agents*. 2019  
36  
37  
38 [18] Fortún J et al. Recomendaciones sobre el tratamiento de la enfermedad fúngica invasiva por  
39 *Aspergillus* spp. y otros hongos filamentosos de la Sociedad Española de Enfermedades Infecciosas  
40 y Microbiología Clínica (SEIMC). Actualización 2011. *Enferm Infecc Microbiol Clin*. 2011;29(6):435  
41 -454  
42  
43  
44  
45  
46 [19] Hicks JK et al. Voriconazole plasma concentrations in immunocompromised pediatric patients  
47 vary by CYP2C19 diplotypes. *Pharmacogenomics*. 2014 Jun;15(8):1065-78  
48  
49  
50  
51  
52  
53  
54  
55  
56  
57  
58  
59  
60

| VISIT                        | Visit of selection | Visit of randomisation           | Primary outcome evaluation (visit) | Follow-up visit               | End-of-treatment visit | End-of-study visit                                  |
|------------------------------|--------------------|----------------------------------|------------------------------------|-------------------------------|------------------------|-----------------------------------------------------|
| Day of the study             | Day 0              | Maximum 3 months after selection | 5th day of treatment (+/- 1 day)   | Weekly until end of treatment | Last day of treatment  | 2 weeks later after ending treatment <sup>(1)</sup> |
| Selection criteria meeting   | X                  |                                  |                                    |                               |                        |                                                     |
| Informed Consent Signing     | X                  |                                  |                                    |                               |                        |                                                     |
| Genetic sample               | X                  |                                  |                                    |                               |                        |                                                     |
| Randomisation                |                    | X                                |                                    |                               |                        |                                                     |
| Starting treatment           |                    | X                                |                                    |                               |                        |                                                     |
| Voriconazole serum levels    |                    |                                  | X                                  | X <sup>(2)</sup>              |                        |                                                     |
| Lab analysis <sup>(3)</sup>  |                    | X                                | X                                  | X                             | X                      | X                                                   |
| Electrocardigram             |                    | X                                | X                                  | X                             | X                      | X                                                   |
| AE <sup>(4)</sup> evaluation |                    | X                                | X                                  | X                             | X                      | X                                                   |

(1) Patients who after 3 months continue being treated, End-of-study visit will be done on the last day of third month.

(2) According to physician criteria

(3) Analysis including liver enzymes.

(4) AE (Adverse Events)

Table1. Study visits planning and study procedures.

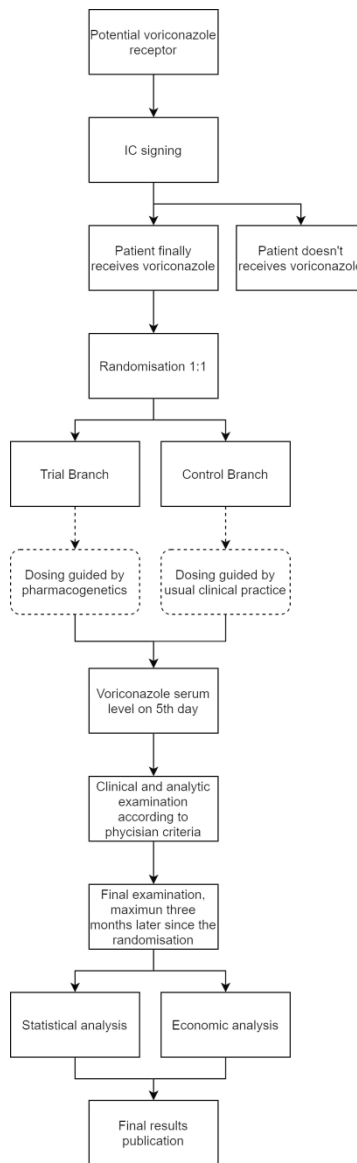

Figure 1. Study Flowchart

Figure 1. Study flowchart



## APPENDIX 1: Trial Investigation Group

- Trial coordination: Alberto M. Borobia, MD, PhD; Antonio J. Carcas, MD, PhD.
- Clinical Researches:
  - La Paz University Hospital:
    - Clinical Pharmacology Department: Jaime Monserrat-Villatoro, MD; Irene Garcia, MD; Elena Ramírez, MD, PhD; Jesús Frías Iniesta, MD, PhD.
    - Pediatric Onco-Haematology Department: David Bueno, MD, PhD.
    - Haematology Department: Ana Lopez, MD, PhD; Teresa de Soto, MD
  - La Princesa University Hospital:
    - Haematology Department: Rafael de la Camara, MD, PD.
    - Clinical Pharmacology Department: Francisco Abad Santos, MD, PhD; Gina Mejia, MD, PhD.
  - Gómez Ulla Hospital:
    - Infectious Diseases. Internal Medicine Department: Miriam Estébanez, MD, PhD.
    - Haematology Department: María José Otero, MD, PhD.
- Pharmacoeconomic analyses:
  - Francisco de Vitoria University - Health Technologies Assessment Department: Cristina Antón, MD, PhD.
- Study monitoring: Foundation for Biomedical Research, University Hospital La Paz: Central Unit for Clinical Research and Clinical Trials. SCReN.

## SPIRIT checklist.

| Included                            | Section/item               | Item No | Description                                                                                                                                                                                                                                                                              | Pg.    |
|-------------------------------------|----------------------------|---------|------------------------------------------------------------------------------------------------------------------------------------------------------------------------------------------------------------------------------------------------------------------------------------------|--------|
| <b>Administrative information</b>   |                            |         |                                                                                                                                                                                                                                                                                          |        |
| <input checked="" type="checkbox"/> | Title                      | 1       | Descriptive title identifying the study design, population, interventions, and, if applicable, trial acronym                                                                                                                                                                             | 1      |
| <input checked="" type="checkbox"/> | Trial registration         | 2a      | Trial identifier and registry name. If not yet registered, name of intended registry                                                                                                                                                                                                     | 1      |
| <input checked="" type="checkbox"/> |                            | 2b      | All items from the World Health Organization Trial Registration Data Set                                                                                                                                                                                                                 | 1-2    |
| <input checked="" type="checkbox"/> | Protocol version           | 3       | Date and version identifier                                                                                                                                                                                                                                                              | 1      |
| <input checked="" type="checkbox"/> | Funding                    | 4       | Sources and types of financial, material, and other support                                                                                                                                                                                                                              | 14     |
| <input checked="" type="checkbox"/> | Roles and responsibilities | 5a      | Names, affiliations, and roles of protocol contributors                                                                                                                                                                                                                                  | 16, 21 |
| <input checked="" type="checkbox"/> |                            | 5b      | Name and contact information for the trial sponsor                                                                                                                                                                                                                                       | 1      |
| <input checked="" type="checkbox"/> |                            | 5c      | Role of study sponsor and funders, if any, in study design; collection, management, analysis, and interpretation of data; writing of the report; and the decision to submit the report for publication, including whether they will have ultimate authority over any of these activities | 14     |
| <input checked="" type="checkbox"/> |                            | 5d      | Composition, roles, and responsibilities of the coordinating centre, steering committee, endpoint adjudication committee, data management team, and other individuals or groups overseeing the trial, if applicable (see Item 21a for data monitoring committee)                         | 14     |
| <b>Introduction</b>                 |                            |         |                                                                                                                                                                                                                                                                                          |        |
| <input checked="" type="checkbox"/> | Background and rationale   | 6a      | Description of research question and justification for undertaking the trial, including summary of relevant studies (published and unpublished) examining benefits and harms for each intervention                                                                                       | 6, 7   |
| <input checked="" type="checkbox"/> |                            | 6b      | Explanation for choice of comparators                                                                                                                                                                                                                                                    | 6, 7   |
| <input checked="" type="checkbox"/> | Objectives                 | 7       | Specific objectives or hypotheses                                                                                                                                                                                                                                                        | 8      |

|    |                                                           |                      |     |                                                                                                                                                                                                                                                                                                                                                                                |            |
|----|-----------------------------------------------------------|----------------------|-----|--------------------------------------------------------------------------------------------------------------------------------------------------------------------------------------------------------------------------------------------------------------------------------------------------------------------------------------------------------------------------------|------------|
| 1  | <input checked="" type="checkbox"/>                       | Trial design         | 8   | Description of trial design including type of trial (eg, parallel group, crossover, factorial, single group), allocation ratio, and framework (eg, superiority, equivalence, noninferiority, exploratory)                                                                                                                                                                      | 7          |
| 2  |                                                           |                      |     |                                                                                                                                                                                                                                                                                                                                                                                |            |
| 3  |                                                           |                      |     |                                                                                                                                                                                                                                                                                                                                                                                |            |
| 4  |                                                           |                      |     |                                                                                                                                                                                                                                                                                                                                                                                |            |
| 5  |                                                           |                      |     |                                                                                                                                                                                                                                                                                                                                                                                |            |
| 6  |                                                           |                      |     |                                                                                                                                                                                                                                                                                                                                                                                |            |
| 7  | <b>Methods: Participants, interventions, and outcomes</b> |                      |     |                                                                                                                                                                                                                                                                                                                                                                                | <b>Pg.</b> |
| 8  |                                                           |                      |     |                                                                                                                                                                                                                                                                                                                                                                                |            |
| 9  | <input checked="" type="checkbox"/>                       | Study setting        | 9   | Description of study settings (eg, community clinic, academic hospital) and list of countries where data will be collected. Reference to where list of study sites can be obtained                                                                                                                                                                                             | 8, 12      |
| 10 |                                                           |                      |     |                                                                                                                                                                                                                                                                                                                                                                                |            |
| 11 | <input checked="" type="checkbox"/>                       | Eligibility criteria | 10  | Inclusion and exclusion criteria for participants. If applicable, eligibility criteria for study centres and individuals who will perform the interventions (eg, surgeons, psychotherapists)                                                                                                                                                                                   | 8          |
| 12 |                                                           |                      |     |                                                                                                                                                                                                                                                                                                                                                                                |            |
| 13 | <input checked="" type="checkbox"/>                       | Interventions        | 11a | Interventions for each group with sufficient detail to allow replication, including how and when they will be administered                                                                                                                                                                                                                                                     | 10, 11     |
| 14 |                                                           |                      |     |                                                                                                                                                                                                                                                                                                                                                                                |            |
| 15 | <input checked="" type="checkbox"/>                       |                      | 11b | Criteria for discontinuing or modifying allocated interventions for a given trial participant (eg, drug dose change in response to harms, participant request, or improving/worsening disease)                                                                                                                                                                                 | 11         |
| 16 |                                                           |                      |     |                                                                                                                                                                                                                                                                                                                                                                                |            |
| 17 | <input checked="" type="checkbox"/>                       |                      | 11c | Strategies to improve adherence to intervention protocols, and any procedures for monitoring adherence (eg, drug tablet return, laboratory tests)                                                                                                                                                                                                                              | 11, 12     |
| 18 |                                                           |                      |     |                                                                                                                                                                                                                                                                                                                                                                                |            |
| 19 | <input checked="" type="checkbox"/>                       |                      | 11d | Relevant concomitant care and interventions that are permitted or prohibited during the trial                                                                                                                                                                                                                                                                                  | 7, 12, 16  |
| 20 |                                                           |                      |     |                                                                                                                                                                                                                                                                                                                                                                                |            |
| 21 | <input checked="" type="checkbox"/>                       | Outcomes             | 12  | Primary, secondary, and other outcomes, including the specific measurement variable (eg, systolic blood pressure), analysis metric (eg, change from baseline, final value, time to event), method of aggregation (eg, median, proportion), and time point for each outcome. Explanation of the clinical relevance of chosen efficacy and harm outcomes is strongly recommended | 9, 10      |
| 22 |                                                           |                      |     |                                                                                                                                                                                                                                                                                                                                                                                |            |
| 23 | <input checked="" type="checkbox"/>                       | Participant timeline | 13  | Time schedule of enrolment, interventions (including any run-ins and washouts), assessments, and visits for participants. A schematic diagram is highly recommended (see Figure)                                                                                                                                                                                               | 10,11,20   |
| 24 |                                                           |                      |     |                                                                                                                                                                                                                                                                                                                                                                                |            |
| 25 |                                                           |                      |     |                                                                                                                                                                                                                                                                                                                                                                                |            |
| 26 |                                                           |                      |     |                                                                                                                                                                                                                                                                                                                                                                                |            |
| 27 |                                                           |                      |     |                                                                                                                                                                                                                                                                                                                                                                                |            |
| 28 |                                                           |                      |     |                                                                                                                                                                                                                                                                                                                                                                                |            |
| 29 |                                                           |                      |     |                                                                                                                                                                                                                                                                                                                                                                                |            |
| 30 |                                                           |                      |     |                                                                                                                                                                                                                                                                                                                                                                                |            |
| 31 |                                                           |                      |     |                                                                                                                                                                                                                                                                                                                                                                                |            |
| 32 |                                                           |                      |     |                                                                                                                                                                                                                                                                                                                                                                                |            |
| 33 |                                                           |                      |     |                                                                                                                                                                                                                                                                                                                                                                                |            |
| 34 |                                                           |                      |     |                                                                                                                                                                                                                                                                                                                                                                                |            |
| 35 |                                                           |                      |     |                                                                                                                                                                                                                                                                                                                                                                                |            |
| 36 |                                                           |                      |     |                                                                                                                                                                                                                                                                                                                                                                                |            |
| 37 |                                                           |                      |     |                                                                                                                                                                                                                                                                                                                                                                                |            |
| 38 |                                                           |                      |     |                                                                                                                                                                                                                                                                                                                                                                                |            |
| 39 |                                                           |                      |     |                                                                                                                                                                                                                                                                                                                                                                                |            |
| 40 |                                                           |                      |     |                                                                                                                                                                                                                                                                                                                                                                                |            |
| 41 |                                                           |                      |     |                                                                                                                                                                                                                                                                                                                                                                                |            |
| 42 |                                                           |                      |     |                                                                                                                                                                                                                                                                                                                                                                                |            |
| 43 |                                                           |                      |     |                                                                                                                                                                                                                                                                                                                                                                                |            |
| 44 |                                                           |                      |     |                                                                                                                                                                                                                                                                                                                                                                                |            |
| 45 |                                                           |                      |     |                                                                                                                                                                                                                                                                                                                                                                                |            |
| 46 |                                                           |                      |     |                                                                                                                                                                                                                                                                                                                                                                                |            |
| 47 |                                                           |                      |     |                                                                                                                                                                                                                                                                                                                                                                                |            |
| 48 |                                                           |                      |     |                                                                                                                                                                                                                                                                                                                                                                                |            |
| 49 |                                                           |                      |     |                                                                                                                                                                                                                                                                                                                                                                                |            |
| 50 |                                                           |                      |     |                                                                                                                                                                                                                                                                                                                                                                                |            |
| 51 |                                                           |                      |     |                                                                                                                                                                                                                                                                                                                                                                                |            |
| 52 |                                                           |                      |     |                                                                                                                                                                                                                                                                                                                                                                                |            |
| 53 |                                                           |                      |     |                                                                                                                                                                                                                                                                                                                                                                                |            |
| 54 |                                                           |                      |     |                                                                                                                                                                                                                                                                                                                                                                                |            |
| 55 |                                                           |                      |     |                                                                                                                                                                                                                                                                                                                                                                                |            |
| 56 |                                                           |                      |     |                                                                                                                                                                                                                                                                                                                                                                                |            |
| 57 |                                                           |                      |     |                                                                                                                                                                                                                                                                                                                                                                                |            |
| 58 |                                                           |                      |     |                                                                                                                                                                                                                                                                                                                                                                                |            |
| 59 |                                                           |                      |     |                                                                                                                                                                                                                                                                                                                                                                                |            |
| 60 |                                                           |                      |     |                                                                                                                                                                                                                                                                                                                                                                                |            |

|    |                                                                     |                                  |     |                                                                                                                                                                                                                                                                                                                                                                                                              |               |
|----|---------------------------------------------------------------------|----------------------------------|-----|--------------------------------------------------------------------------------------------------------------------------------------------------------------------------------------------------------------------------------------------------------------------------------------------------------------------------------------------------------------------------------------------------------------|---------------|
| 1  | <input checked="" type="checkbox"/>                                 | Sample size                      | 14  | Estimated number of participants needed to achieve study objectives and how it was determined, including clinical and statistical assumptions supporting any sample size calculations                                                                                                                                                                                                                        | 12            |
| 2  |                                                                     |                                  |     |                                                                                                                                                                                                                                                                                                                                                                                                              |               |
| 3  | <input checked="" type="checkbox"/>                                 | Recruitment                      | 15  | Strategies for achieving adequate participant enrolment to reach target sample size                                                                                                                                                                                                                                                                                                                          | 12            |
| 4  |                                                                     |                                  |     |                                                                                                                                                                                                                                                                                                                                                                                                              |               |
| 5  |                                                                     |                                  |     |                                                                                                                                                                                                                                                                                                                                                                                                              |               |
| 6  |                                                                     |                                  |     |                                                                                                                                                                                                                                                                                                                                                                                                              |               |
| 7  |                                                                     |                                  |     |                                                                                                                                                                                                                                                                                                                                                                                                              |               |
| 8  |                                                                     |                                  |     |                                                                                                                                                                                                                                                                                                                                                                                                              |               |
| 9  |                                                                     |                                  |     |                                                                                                                                                                                                                                                                                                                                                                                                              |               |
| 10 |                                                                     |                                  |     |                                                                                                                                                                                                                                                                                                                                                                                                              |               |
| 11 | <b>Methods: Assignment of interventions (for controlled trials)</b> |                                  |     |                                                                                                                                                                                                                                                                                                                                                                                                              |               |
| 12 | Allocation:                                                         |                                  |     |                                                                                                                                                                                                                                                                                                                                                                                                              |               |
| 13 |                                                                     |                                  |     |                                                                                                                                                                                                                                                                                                                                                                                                              |               |
| 14 | <input checked="" type="checkbox"/>                                 | Sequence generation              | 16a | Method of generating the allocation sequence (eg, computer-generated random numbers), and list of any factors for stratification. To reduce predictability of a random sequence, details of any planned restriction (eg, blocking) should be provided in a separate document that is unavailable to those who enrol participants or assign interventions                                                     | 9             |
| 15 |                                                                     |                                  |     |                                                                                                                                                                                                                                                                                                                                                                                                              |               |
| 16 |                                                                     |                                  |     |                                                                                                                                                                                                                                                                                                                                                                                                              |               |
| 17 |                                                                     |                                  |     |                                                                                                                                                                                                                                                                                                                                                                                                              |               |
| 18 | <input checked="" type="checkbox"/>                                 | Allocation concealment mechanism | 16b | Mechanism of implementing the allocation sequence (eg, central telephone; sequentially numbered, opaque, sealed envelopes), describing any steps to conceal the sequence until interventions are assigned                                                                                                                                                                                                    | 9             |
| 19 |                                                                     |                                  |     |                                                                                                                                                                                                                                                                                                                                                                                                              |               |
| 20 |                                                                     |                                  |     |                                                                                                                                                                                                                                                                                                                                                                                                              |               |
| 21 |                                                                     |                                  |     |                                                                                                                                                                                                                                                                                                                                                                                                              |               |
| 22 |                                                                     |                                  |     |                                                                                                                                                                                                                                                                                                                                                                                                              |               |
| 23 |                                                                     |                                  |     |                                                                                                                                                                                                                                                                                                                                                                                                              |               |
| 24 |                                                                     |                                  |     |                                                                                                                                                                                                                                                                                                                                                                                                              |               |
| 25 | <input checked="" type="checkbox"/>                                 | Implementation                   | 16c | Who will generate the allocation sequence, who will enrol participants, and who will assign participants to interventions                                                                                                                                                                                                                                                                                    | 9, 10, 11, 21 |
| 26 |                                                                     |                                  |     |                                                                                                                                                                                                                                                                                                                                                                                                              |               |
| 27 |                                                                     |                                  |     |                                                                                                                                                                                                                                                                                                                                                                                                              |               |
| 28 |                                                                     |                                  |     |                                                                                                                                                                                                                                                                                                                                                                                                              |               |
| 29 |                                                                     |                                  |     |                                                                                                                                                                                                                                                                                                                                                                                                              |               |
| 30 |                                                                     |                                  |     |                                                                                                                                                                                                                                                                                                                                                                                                              |               |
| 31 |                                                                     |                                  |     |                                                                                                                                                                                                                                                                                                                                                                                                              |               |
| 32 |                                                                     |                                  |     |                                                                                                                                                                                                                                                                                                                                                                                                              |               |
| 33 | <input checked="" type="checkbox"/>                                 | Blinding (masking)               | 17a | Who will be blinded after assignment to interventions (eg, trial participants, care providers, outcome assessors, data analysts), and how                                                                                                                                                                                                                                                                    | 9             |
| 34 |                                                                     |                                  |     |                                                                                                                                                                                                                                                                                                                                                                                                              |               |
| 35 |                                                                     |                                  |     |                                                                                                                                                                                                                                                                                                                                                                                                              |               |
| 36 |                                                                     |                                  |     |                                                                                                                                                                                                                                                                                                                                                                                                              |               |
| 37 | <input checked="" type="checkbox"/>                                 |                                  | 17b | If blinded, circumstances under which unblinding is permissible, and procedure for revealing a participant's allocated intervention during the trial                                                                                                                                                                                                                                                         | 9             |
| 38 |                                                                     |                                  |     |                                                                                                                                                                                                                                                                                                                                                                                                              |               |
| 39 |                                                                     |                                  |     |                                                                                                                                                                                                                                                                                                                                                                                                              |               |
| 40 |                                                                     |                                  |     |                                                                                                                                                                                                                                                                                                                                                                                                              |               |
| 41 |                                                                     |                                  |     |                                                                                                                                                                                                                                                                                                                                                                                                              |               |
| 42 |                                                                     |                                  |     |                                                                                                                                                                                                                                                                                                                                                                                                              |               |
| 43 |                                                                     |                                  |     |                                                                                                                                                                                                                                                                                                                                                                                                              |               |
| 44 |                                                                     |                                  |     |                                                                                                                                                                                                                                                                                                                                                                                                              |               |
| 45 |                                                                     |                                  |     |                                                                                                                                                                                                                                                                                                                                                                                                              |               |
| 46 |                                                                     |                                  |     |                                                                                                                                                                                                                                                                                                                                                                                                              |               |
| 47 |                                                                     |                                  |     |                                                                                                                                                                                                                                                                                                                                                                                                              |               |
| 48 |                                                                     |                                  |     |                                                                                                                                                                                                                                                                                                                                                                                                              |               |
| 49 | <b>Methods: Data collection, management, and analysis</b>           |                                  |     |                                                                                                                                                                                                                                                                                                                                                                                                              |               |
| 50 |                                                                     |                                  |     |                                                                                                                                                                                                                                                                                                                                                                                                              |               |
| 51 | <input checked="" type="checkbox"/>                                 | Data collection methods          | 18a | Plans for assessment and collection of outcome, baseline, and other trial data, including any related processes to promote data quality (eg, duplicate measurements, training of assessors) and a description of study instruments (eg, questionnaires, laboratory tests) along with their reliability and validity, if known. Reference to where data collection forms can be found, if not in the protocol | 12            |
| 52 |                                                                     |                                  |     |                                                                                                                                                                                                                                                                                                                                                                                                              |               |
| 53 |                                                                     |                                  |     |                                                                                                                                                                                                                                                                                                                                                                                                              |               |
| 54 |                                                                     |                                  |     |                                                                                                                                                                                                                                                                                                                                                                                                              |               |
| 55 |                                                                     |                                  |     |                                                                                                                                                                                                                                                                                                                                                                                                              |               |
| 56 |                                                                     |                                  |     |                                                                                                                                                                                                                                                                                                                                                                                                              |               |
| 57 |                                                                     |                                  |     |                                                                                                                                                                                                                                                                                                                                                                                                              |               |
| 58 |                                                                     |                                  |     |                                                                                                                                                                                                                                                                                                                                                                                                              |               |
| 59 |                                                                     |                                  |     |                                                                                                                                                                                                                                                                                                                                                                                                              |               |
| 60 |                                                                     |                                  |     |                                                                                                                                                                                                                                                                                                                                                                                                              |               |

|    |                                     |                     |     |                                                                                                                                                                                                                                                                   |       |
|----|-------------------------------------|---------------------|-----|-------------------------------------------------------------------------------------------------------------------------------------------------------------------------------------------------------------------------------------------------------------------|-------|
| 1  | <input checked="" type="checkbox"/> |                     | 18b | Plans to promote participant retention and complete follow-up, including list of any outcome data to be collected for participants who discontinue or deviate from intervention protocols                                                                         | 12    |
| 2  |                                     |                     |     |                                                                                                                                                                                                                                                                   |       |
| 3  | <input checked="" type="checkbox"/> | Data management     | 19  | Plans for data entry, coding, security, and storage, including any related processes to promote data quality (eg, double data entry; range checks for data values). Reference to where details of data management procedures can be found, if not in the protocol | 12    |
| 4  |                                     |                     |     |                                                                                                                                                                                                                                                                   |       |
| 5  | <input checked="" type="checkbox"/> | Statistical methods | 20a | Statistical methods for analysing primary and secondary outcomes. Reference to where other details of the statistical analysis plan can be found, if not in the protocol                                                                                          | 12,13 |
| 6  |                                     |                     |     |                                                                                                                                                                                                                                                                   |       |
| 7  | <input checked="" type="checkbox"/> |                     | 20b | Methods for any additional analyses (eg, subgroup and adjusted analyses)                                                                                                                                                                                          | 12,13 |
| 8  |                                     |                     |     |                                                                                                                                                                                                                                                                   |       |
| 9  | <input checked="" type="checkbox"/> |                     | 20c | Definition of analysis population relating to protocol non-adherence (eg, as randomised analysis), and any statistical methods to handle missing data (eg, multiple imputation)                                                                                   | 12,13 |
| 10 |                                     |                     |     |                                                                                                                                                                                                                                                                   |       |
| 11 |                                     |                     |     |                                                                                                                                                                                                                                                                   |       |
| 12 |                                     |                     |     |                                                                                                                                                                                                                                                                   |       |
| 13 |                                     |                     |     |                                                                                                                                                                                                                                                                   |       |
| 14 |                                     |                     |     |                                                                                                                                                                                                                                                                   |       |
| 15 |                                     |                     |     |                                                                                                                                                                                                                                                                   |       |
| 16 |                                     |                     |     |                                                                                                                                                                                                                                                                   |       |
| 17 |                                     |                     |     |                                                                                                                                                                                                                                                                   |       |
| 18 |                                     |                     |     |                                                                                                                                                                                                                                                                   |       |
| 19 |                                     |                     |     |                                                                                                                                                                                                                                                                   |       |
| 20 |                                     |                     |     |                                                                                                                                                                                                                                                                   |       |
| 21 |                                     |                     |     |                                                                                                                                                                                                                                                                   |       |
| 22 |                                     |                     |     |                                                                                                                                                                                                                                                                   |       |
| 23 |                                     |                     |     |                                                                                                                                                                                                                                                                   |       |
| 24 |                                     |                     |     |                                                                                                                                                                                                                                                                   |       |
| 25 |                                     |                     |     |                                                                                                                                                                                                                                                                   |       |
| 26 |                                     |                     |     |                                                                                                                                                                                                                                                                   |       |
| 27 |                                     |                     |     |                                                                                                                                                                                                                                                                   |       |
| 28 |                                     |                     |     |                                                                                                                                                                                                                                                                   |       |
| 29 |                                     |                     |     |                                                                                                                                                                                                                                                                   |       |

|    |                                     |                 |     |                                                                                                                                                                                                                                                                                                                                       |        |
|----|-------------------------------------|-----------------|-----|---------------------------------------------------------------------------------------------------------------------------------------------------------------------------------------------------------------------------------------------------------------------------------------------------------------------------------------|--------|
| 30 | <b>Methods: Monitoring</b>          |                 |     |                                                                                                                                                                                                                                                                                                                                       |        |
| 31 |                                     |                 |     |                                                                                                                                                                                                                                                                                                                                       |        |
| 32 | <input checked="" type="checkbox"/> | Data monitoring | 21a | Composition of data monitoring committee (DMC); summary of its role and reporting structure; statement of whether it is independent from the sponsor and competing interests; and reference to where further details about its charter can be found, if not in the protocol. Alternatively, an explanation of why a DMC is not needed | 14     |
| 33 |                                     |                 |     |                                                                                                                                                                                                                                                                                                                                       |        |
| 34 | <input checked="" type="checkbox"/> |                 | 21b | Description of any interim analyses and stopping guidelines, including who will have access to these interim results and make the final decision to terminate the trial                                                                                                                                                               | 12, 13 |
| 35 |                                     |                 |     |                                                                                                                                                                                                                                                                                                                                       |        |
| 36 | <input checked="" type="checkbox"/> | Harms           | 22  | Plans for collecting, assessing, reporting, and managing solicited and spontaneously reported adverse events and other unintended effects of trial interventions or trial conduct                                                                                                                                                     | 11     |
| 37 |                                     |                 |     |                                                                                                                                                                                                                                                                                                                                       |        |
| 38 | <input checked="" type="checkbox"/> | Auditing        | 23  | Frequency and procedures for auditing trial conduct, if any, and whether the process will be independent from investigators and the sponsor                                                                                                                                                                                           | 14     |
| 39 |                                     |                 |     |                                                                                                                                                                                                                                                                                                                                       |        |
| 40 |                                     |                 |     |                                                                                                                                                                                                                                                                                                                                       |        |
| 41 |                                     |                 |     |                                                                                                                                                                                                                                                                                                                                       |        |
| 42 |                                     |                 |     |                                                                                                                                                                                                                                                                                                                                       |        |
| 43 |                                     |                 |     |                                                                                                                                                                                                                                                                                                                                       |        |
| 44 |                                     |                 |     |                                                                                                                                                                                                                                                                                                                                       |        |
| 45 |                                     |                 |     |                                                                                                                                                                                                                                                                                                                                       |        |
| 46 |                                     |                 |     |                                                                                                                                                                                                                                                                                                                                       |        |
| 47 |                                     |                 |     |                                                                                                                                                                                                                                                                                                                                       |        |
| 48 |                                     |                 |     |                                                                                                                                                                                                                                                                                                                                       |        |
| 49 |                                     |                 |     |                                                                                                                                                                                                                                                                                                                                       |        |
| 50 |                                     |                 |     |                                                                                                                                                                                                                                                                                                                                       |        |
| 51 |                                     |                 |     |                                                                                                                                                                                                                                                                                                                                       |        |
| 52 |                                     |                 |     |                                                                                                                                                                                                                                                                                                                                       |        |
| 53 |                                     |                 |     |                                                                                                                                                                                                                                                                                                                                       |        |
| 54 |                                     |                 |     |                                                                                                                                                                                                                                                                                                                                       |        |
| 55 |                                     |                 |     |                                                                                                                                                                                                                                                                                                                                       |        |
| 56 |                                     |                 |     |                                                                                                                                                                                                                                                                                                                                       |        |
| 57 |                                     |                 |     |                                                                                                                                                                                                                                                                                                                                       |        |
| 58 |                                     |                 |     |                                                                                                                                                                                                                                                                                                                                       |        |
| 59 |                                     |                 |     |                                                                                                                                                                                                                                                                                                                                       |        |
| 60 |                                     |                 |     |                                                                                                                                                                                                                                                                                                                                       |        |

|                                 |  |
|---------------------------------|--|
| <b>Ethics and dissemination</b> |  |
|---------------------------------|--|

|    |                                     |                               |     |                                                                                                                                                                                                                                                                                     |       |
|----|-------------------------------------|-------------------------------|-----|-------------------------------------------------------------------------------------------------------------------------------------------------------------------------------------------------------------------------------------------------------------------------------------|-------|
| 1  | <input checked="" type="checkbox"/> | Research ethics approval      | 24  | Plans for seeking research ethics committee/institutional review board (REC/IRB) approval                                                                                                                                                                                           | 15    |
| 2  |                                     |                               |     |                                                                                                                                                                                                                                                                                     |       |
| 3  |                                     |                               |     |                                                                                                                                                                                                                                                                                     |       |
| 4  |                                     |                               |     |                                                                                                                                                                                                                                                                                     |       |
| 5  | <input checked="" type="checkbox"/> | Protocol amendments           | 25  | Plans for communicating important protocol modifications (eg, changes to eligibility criteria, outcomes, analyses) to relevant parties (eg, investigators, REC/IRBs, trial participants, trial registries, journals, regulators)                                                    | 15    |
| 6  |                                     |                               |     |                                                                                                                                                                                                                                                                                     |       |
| 7  |                                     |                               |     |                                                                                                                                                                                                                                                                                     |       |
| 8  |                                     |                               |     |                                                                                                                                                                                                                                                                                     |       |
| 9  |                                     |                               |     |                                                                                                                                                                                                                                                                                     |       |
| 10 |                                     |                               |     |                                                                                                                                                                                                                                                                                     |       |
| 11 |                                     |                               |     |                                                                                                                                                                                                                                                                                     |       |
| 12 |                                     |                               |     |                                                                                                                                                                                                                                                                                     |       |
| 13 | <input checked="" type="checkbox"/> | Consent or assent             | 26a | Who will obtain informed consent or assent from potential trial participants or authorised surrogates, and how (see Item 32)                                                                                                                                                        | 10    |
| 14 |                                     |                               |     |                                                                                                                                                                                                                                                                                     |       |
| 15 |                                     |                               |     |                                                                                                                                                                                                                                                                                     |       |
| 16 |                                     |                               |     |                                                                                                                                                                                                                                                                                     |       |
| 17 | <input checked="" type="checkbox"/> |                               | 26b | Additional consent provisions for collection and use of participant data and biological specimens in ancillary studies, if applicable                                                                                                                                               | 9     |
| 18 |                                     |                               |     |                                                                                                                                                                                                                                                                                     |       |
| 19 |                                     |                               |     |                                                                                                                                                                                                                                                                                     |       |
| 20 |                                     |                               |     |                                                                                                                                                                                                                                                                                     |       |
| 21 |                                     |                               |     |                                                                                                                                                                                                                                                                                     |       |
| 22 | <input checked="" type="checkbox"/> | Confidentiality               | 27  | How personal information about potential and enrolled participants will be collected, shared, and maintained in order to protect confidentiality before, during, and after the trial                                                                                                | 15    |
| 23 |                                     |                               |     |                                                                                                                                                                                                                                                                                     |       |
| 24 |                                     |                               |     |                                                                                                                                                                                                                                                                                     |       |
| 25 |                                     |                               |     |                                                                                                                                                                                                                                                                                     |       |
| 26 |                                     |                               |     |                                                                                                                                                                                                                                                                                     |       |
| 27 |                                     |                               |     |                                                                                                                                                                                                                                                                                     |       |
| 28 | <input checked="" type="checkbox"/> | Declaration of interests      | 28  | Financial and other competing interests for principal investigators for the overall trial and each study site                                                                                                                                                                       | 14    |
| 29 |                                     |                               |     |                                                                                                                                                                                                                                                                                     |       |
| 30 |                                     |                               |     |                                                                                                                                                                                                                                                                                     |       |
| 31 |                                     |                               |     |                                                                                                                                                                                                                                                                                     |       |
| 32 |                                     |                               |     |                                                                                                                                                                                                                                                                                     |       |
| 33 | <input checked="" type="checkbox"/> | Access to data                | 29  | Statement of who will have access to the final trial dataset, and disclosure of contractual agreements that limit such access for investigators                                                                                                                                     | 14    |
| 34 |                                     |                               |     |                                                                                                                                                                                                                                                                                     |       |
| 35 |                                     |                               |     |                                                                                                                                                                                                                                                                                     |       |
| 36 |                                     |                               |     |                                                                                                                                                                                                                                                                                     |       |
| 37 |                                     |                               |     |                                                                                                                                                                                                                                                                                     |       |
| 38 | <input checked="" type="checkbox"/> | Ancillary and post-trial care | 30  | Provisions, if any, for ancillary and post-trial care, and for compensation to those who suffer harm from trial participation                                                                                                                                                       | 15    |
| 39 |                                     |                               |     |                                                                                                                                                                                                                                                                                     |       |
| 40 |                                     |                               |     |                                                                                                                                                                                                                                                                                     |       |
| 41 |                                     |                               |     |                                                                                                                                                                                                                                                                                     |       |
| 42 |                                     |                               |     |                                                                                                                                                                                                                                                                                     |       |
| 43 | <input checked="" type="checkbox"/> | Dissemination policy          | 31a | Plans for investigators and sponsor to communicate trial results to participants, healthcare professionals, the public, and other relevant groups (eg, via publication, reporting in results databases, or other data sharing arrangements), including any publication restrictions | 2,14  |
| 44 |                                     |                               |     |                                                                                                                                                                                                                                                                                     |       |
| 45 |                                     |                               |     |                                                                                                                                                                                                                                                                                     |       |
| 46 |                                     |                               |     |                                                                                                                                                                                                                                                                                     |       |
| 47 |                                     |                               |     |                                                                                                                                                                                                                                                                                     |       |
| 48 |                                     |                               |     |                                                                                                                                                                                                                                                                                     |       |
| 49 |                                     |                               |     |                                                                                                                                                                                                                                                                                     |       |
| 50 |                                     |                               |     |                                                                                                                                                                                                                                                                                     |       |
| 51 | <input checked="" type="checkbox"/> |                               | 31b | Authorship eligibility guidelines and any intended use of professional writers                                                                                                                                                                                                      | 16    |
| 52 |                                     |                               |     |                                                                                                                                                                                                                                                                                     |       |
| 53 |                                     |                               |     |                                                                                                                                                                                                                                                                                     |       |
| 54 | <input checked="" type="checkbox"/> |                               | 31c | Plans, if any, for granting public access to the full protocol, participant- level dataset, and statistical code                                                                                                                                                                    | 2, 14 |
| 55 |                                     |                               |     |                                                                                                                                                                                                                                                                                     |       |
| 56 |                                     |                               |     |                                                                                                                                                                                                                                                                                     |       |
| 57 |                                     |                               |     |                                                                                                                                                                                                                                                                                     |       |
| 58 |                                     |                               |     |                                                                                                                                                                                                                                                                                     |       |
| 59 | <b>Appendices</b>                   |                               |     |                                                                                                                                                                                                                                                                                     |       |
| 60 |                                     |                               |     |                                                                                                                                                                                                                                                                                     |       |

|   |                                     |                            |    |                                                                                                                                                                                                |      |
|---|-------------------------------------|----------------------------|----|------------------------------------------------------------------------------------------------------------------------------------------------------------------------------------------------|------|
| 1 | <input checked="" type="checkbox"/> | Informed consent materials | 32 | Model consent form and other related documentation given to participants and authorised surrogates                                                                                             | *    |
| 2 |                                     |                            |    |                                                                                                                                                                                                |      |
| 3 |                                     |                            |    |                                                                                                                                                                                                |      |
| 4 |                                     |                            |    |                                                                                                                                                                                                |      |
| 5 | <input checked="" type="checkbox"/> | Biological specimens       | 33 | Plans for collection, laboratory evaluation, and storage of biological specimens for genetic or molecular analysis in the current trial and for future use in ancillary studies, if applicable | 9, * |
| 6 |                                     |                            |    |                                                                                                                                                                                                |      |
| 7 |                                     |                            |    |                                                                                                                                                                                                |      |
| 8 |                                     |                            |    |                                                                                                                                                                                                |      |
| 9 |                                     |                            |    |                                                                                                                                                                                                |      |

## COMMENTS:

\* Some parts of the documentation will be attached to the submission, such as the model consent form and other related documentation.

For peer review only

# BMJ Open

## RANDOMISED MULTICENTRE CLINICAL TRIAL TO EVALUATE VORICONAZOLE PRE-EMPTIVE GENOTYPING STRATEGY IN PATIENTS WITH RISK OF ASPERGILLOSIS: VORIGENIPHARM STUDY PROTOCOL

|                                 |                                                                                                                                                                                                                                                                                                                                                                                                                                                                                                                                                                                                                                                                                                                                                                                                                                                                                                                                                                                                                                                                                                                                                                                                                                                                                                                                                                                                                                                                                                                   |
|---------------------------------|-------------------------------------------------------------------------------------------------------------------------------------------------------------------------------------------------------------------------------------------------------------------------------------------------------------------------------------------------------------------------------------------------------------------------------------------------------------------------------------------------------------------------------------------------------------------------------------------------------------------------------------------------------------------------------------------------------------------------------------------------------------------------------------------------------------------------------------------------------------------------------------------------------------------------------------------------------------------------------------------------------------------------------------------------------------------------------------------------------------------------------------------------------------------------------------------------------------------------------------------------------------------------------------------------------------------------------------------------------------------------------------------------------------------------------------------------------------------------------------------------------------------|
| Journal:                        | <i>BMJ Open</i>                                                                                                                                                                                                                                                                                                                                                                                                                                                                                                                                                                                                                                                                                                                                                                                                                                                                                                                                                                                                                                                                                                                                                                                                                                                                                                                                                                                                                                                                                                   |
| Manuscript ID                   | bmjopen-2020-037443.R1                                                                                                                                                                                                                                                                                                                                                                                                                                                                                                                                                                                                                                                                                                                                                                                                                                                                                                                                                                                                                                                                                                                                                                                                                                                                                                                                                                                                                                                                                            |
| Article Type:                   | Protocol                                                                                                                                                                                                                                                                                                                                                                                                                                                                                                                                                                                                                                                                                                                                                                                                                                                                                                                                                                                                                                                                                                                                                                                                                                                                                                                                                                                                                                                                                                          |
| Date Submitted by the Author:   | 25-Jun-2020                                                                                                                                                                                                                                                                                                                                                                                                                                                                                                                                                                                                                                                                                                                                                                                                                                                                                                                                                                                                                                                                                                                                                                                                                                                                                                                                                                                                                                                                                                       |
| Complete List of Authors:       | <p>Monserrat Villatoro, Jaime; Hospital Universitario La Paz, Clinical Pharmacology Department<br/> García García, Irene; Hospital Universitario La Paz, Clinical Pharmacology Department<br/> Bueno, David; Hospital Universitario La Paz, Pediatric Oncology and Haematology Department<br/> de la Cámara, Rafael; Hospital Universitario de la Princesa, Haematology Department<br/> Estébanez, Miriam; Hospital Central de la Defensa Gómez Ulla, Internal Medicine Department<br/> López de la Guía, Ana; Hospital Universitario La Paz, Haematology Department<br/> Abad-Santos, Francisco; Hospital Universitario de la Princesa<br/> Antón, Cristina; Universidad Francisco de Vitoria, Health Technology Assessment Department<br/> Mejía, Gina; Hospital Universitario de la Princesa, Clinical Pharmacology<br/> Otero, María José; Hospital Central de la Defensa Gómez Ulla, Haematology Department<br/> Ramírez García, Elena; Hospital Universitario La Paz, Clinical Pharmacology Department; Universidad Autonoma de Madrid, Pharmacology Department<br/> Frías Iniesta, Jesús; Hospital Universitario La Paz, Clinical Pharmacology Department; Universidad Autonoma de Madrid, Pharmacology Department<br/> Carcas, Antonio; Hospital Universitario La Paz, Clinical Pharmacology; Universidad Autonoma de Madrid, Pharmacology Department<br/> Borobia, Alberto; Hospital Universitario La Paz, Clinical Pharmacology Department; Universidad Autonoma de Madrid, Pharmacology Department</p> |
| <b>Primary Subject Heading</b>: | Genetics and genomics                                                                                                                                                                                                                                                                                                                                                                                                                                                                                                                                                                                                                                                                                                                                                                                                                                                                                                                                                                                                                                                                                                                                                                                                                                                                                                                                                                                                                                                                                             |
| Secondary Subject Heading:      | Infectious diseases                                                                                                                                                                                                                                                                                                                                                                                                                                                                                                                                                                                                                                                                                                                                                                                                                                                                                                                                                                                                                                                                                                                                                                                                                                                                                                                                                                                                                                                                                               |
| Keywords:                       | CLINICAL PHARMACOLOGY, INFECTIOUS DISEASES, Clinical trials < THERAPEUTICS                                                                                                                                                                                                                                                                                                                                                                                                                                                                                                                                                                                                                                                                                                                                                                                                                                                                                                                                                                                                                                                                                                                                                                                                                                                                                                                                                                                                                                        |



1  
2  
3  
4  
5  
6  
7  
8  
9  
10  
11  
12  
13  
14  
15  
16  
17  
18  
19  
20  
21  
22  
23  
24  
25  
26  
27  
28  
29  
30  
31  
32  
33  
34  
35  
36  
37  
38  
39  
40  
41  
42  
43  
44  
45  
46  
47  
48  
49  
50  
51  
52  
53  
54  
55  
56  
57  
58  
59  
60

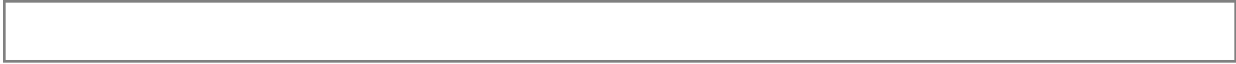

SCHOLARONE™  
Manuscripts



I, the Submitting Author has the right to grant and does grant on behalf of all authors of the Work (as defined in the below author licence), an exclusive licence and/or a non-exclusive licence for contributions from authors who are: i) UK Crown employees; ii) where BMJ has agreed a CC-BY licence shall apply, and/or iii) in accordance with the terms applicable for US Federal Government officers or employees acting as part of their official duties; on a worldwide, perpetual, irrevocable, royalty-free basis to BMJ Publishing Group Ltd ("BMJ") its licensees and where the relevant Journal is co-owned by BMJ to the co-owners of the Journal, to publish the Work in this journal and any other BMJ products and to exploit all rights, as set out in our [licence](#).

The Submitting Author accepts and understands that any supply made under these terms is made by BMJ to the Submitting Author unless you are acting as an employee on behalf of your employer or a postgraduate student of an affiliated institution which is paying any applicable article publishing charge ("APC") for Open Access articles. Where the Submitting Author wishes to make the Work available on an Open Access basis (and intends to pay the relevant APC), the terms of reuse of such Open Access shall be governed by a Creative Commons licence – details of these licences and which [Creative Commons](#) licence will apply to this Work are set out in our licence referred to above.

Other than as permitted in any relevant BMJ Author's Self Archiving Policies, I confirm this Work has not been accepted for publication elsewhere, is not being considered for publication elsewhere and does not duplicate material already published. I confirm all authors consent to publication of this Work and authorise the granting of this licence.

**TITLE: RANDOMISED MULTICENTRE CLINICAL TRIAL TO EVALUATE VORICONAZOLE PRE-EMPTIVE GENOTYPING STRATEGY IN PATIENTS WITH RISK OF ASPERGILLOSIS: VORIGENIPHARM STUDY PROTOCOL**

| <b>Data category</b>                             | <b>Information</b>                                                                                                                                                                                                                                                                                                                       |
|--------------------------------------------------|------------------------------------------------------------------------------------------------------------------------------------------------------------------------------------------------------------------------------------------------------------------------------------------------------------------------------------------|
| Primary registry and trial identification number | EU Clinical Trials Register<br><a href="https://www.clinicaltrialsregister.eu/ctr-search/search">https://www.clinicaltrialsregister.eu/ctr-search/search</a><br>2019-000376-41<br><br>ClinicalTrials.Gov<br><a href="https://clinicaltrials.gov/ct2/show/NCT04238884">https://clinicaltrials.gov/ct2/show/NCT04238884</a><br>NCT04238884 |
| Date of registration in primary registry         | 18 June 2019                                                                                                                                                                                                                                                                                                                             |
| Source(s) of monetary or material support        | Institute of Health Carlos III, grants for Health Research Project 2018 of Spain                                                                                                                                                                                                                                                         |
| Primary sponsor                                  | La Paz University Hospital Research Foundation (FIBHULP)                                                                                                                                                                                                                                                                                 |
| Contact for public queries                       | Alberto M. Borobia Perez, MD, PhD, La Paz University Hospital, Clinical Pharmacology Department, +34917277558, <a href="mailto:alberto.borobia@salud.madrid.org">alberto.borobia@salud.madrid.org</a>                                                                                                                                    |
| Contact for scientific queries                   | Alberto M. Borobia Perez, MD, PhD, La Paz University Hospital, Clinical Pharmacology Department, +34917277558, <a href="mailto:alberto.borobia@salud.madrid.org">alberto.borobia@salud.madrid.org</a>                                                                                                                                    |
| Public title                                     | Clinical trial to evaluate the effectiveness and efficiency of pre-emptive genotyping before treatment with voriconazole                                                                                                                                                                                                                 |
| Scientific title                                 | Randomised multicentre clinical trial to evaluate voriconazole pre-emptive genotyping strategy in patients with risk of aspergillosis: vorigenipharm study protocol                                                                                                                                                                      |
| Countries of recruitment                         | Spain                                                                                                                                                                                                                                                                                                                                    |
| Health condition(s) or problem(s) studied        | Fungal infectious disorders, neutropaenia, chemotherapy-induced neutropaenia, haematopoietic neoplasm, allogeneic peripheral haematopoietic stem cell transplant, autologous peripheral haematopoietic stem cell transplant                                                                                                              |
| Intervention(s)                                  | Pre-emptive genotyping plus post-serum levels vs sole post-serum level adjustment of voriconazole                                                                                                                                                                                                                                        |

|                                      |                                                                                                                                                                                                                                                                                                                                                                                                                                                                                                                                                     |
|--------------------------------------|-----------------------------------------------------------------------------------------------------------------------------------------------------------------------------------------------------------------------------------------------------------------------------------------------------------------------------------------------------------------------------------------------------------------------------------------------------------------------------------------------------------------------------------------------------|
| Key inclusion and exclusion criteria | Ages eligible for study: no limit<br>Sexes eligible for study: both<br>Accepts healthy volunteers: no<br>Inclusion criteria: children who are going to receive an HSCT and those who have diagnosis of acute myeloid leukaemia as well as its relapse. Adults diagnosed with acute leukaemia, with expected prolonged neutropaenia, and those with risk of developing a fungal infection.<br>Exclusion criteria: patients who for any reason should not be included in the study according to the criteria of the research team.                    |
| Study type                           | Interventional<br>Allocation: randomised<br>Intervention model: parallel assignment<br>Masking: single-blind (subject)<br>Primary purpose: prevention<br>Phase IV                                                                                                                                                                                                                                                                                                                                                                                   |
| Date of first enrolment              | January 2020                                                                                                                                                                                                                                                                                                                                                                                                                                                                                                                                        |
| Target sample size                   | 146                                                                                                                                                                                                                                                                                                                                                                                                                                                                                                                                                 |
| Recruitment status                   | Not started                                                                                                                                                                                                                                                                                                                                                                                                                                                                                                                                         |
| Primary outcome(s)                   | Serum voriconazole concentration within the therapeutic range.                                                                                                                                                                                                                                                                                                                                                                                                                                                                                      |
| Key secondary outcomes               | Therapeutic failure and adverse events. Dose-related adverse events associated with treatment                                                                                                                                                                                                                                                                                                                                                                                                                                                       |
| Ethics Review                        | Status: Approved.<br>Date of approval: June 6th 2019 and June 18th 2019.<br>Name and contact details of Ethics committee(s): approved by 'La Paz' University Hospital Ethics Committee and the Spanish Drugs and Health Products Agency, respectively.                                                                                                                                                                                                                                                                                              |
| IPD sharing statement                | Plan to share IPD (Yes, No): Yes.<br>Plan description:<br>A copy of the database of data collected during the clinical trial will be attached as an appendix to the publication resulting from this clinical trial.<br>This data will be available at the same time as the results will be published, and will be kept available to everyone without any time limit. Data will be available indefinitely on the publisher's website, as long as it is kept by the Publisher, for anyone who wishes to access the data, for non-commercial purposes. |

**AUTHORS**

Jaime Monserrat-Villatoro, MD †  
Clinical Pharmacology Department  
La Paz University Hospital, IdiPAZ

Irene Garcia, MD †  
Clinical Pharmacology Department  
La Paz University Hospital, IdiPAZ

David Bueno, MD, PhD  
Paediatric Onco-Haematology Department  
La Paz University Hospital, IdiPAZ

Rafael de la Camara, MD, PD  
Haematology Department  
La Princesa University Hospital

Miriam Estébanez, MD, PhD  
Infectious Diseases, Internal Medicine Department  
Gómez Ulla Hospital  
University of Alcalá de Henares

Ana Lopez, MD, PhD  
Haematology Department  
La Paz University Hospital

Francisco Abad Santos, MD, PhD  
Clinical Pharmacology Department  
La Princesa University Hospital  
Autonomous University of Madrid

Cristina Antón, MD, PhD  
Health Technologies Assessment Department  
Francisco de Vitoria University

Gina Mejia, MD, PhD  
Clinical Pharmacology Department  
La Princesa University Hospital

María José Otero, MD, PhD  
Haematology Department  
Gómez Ulla Hospital

Elena Ramírez, MD, PhD  
Clinical Pharmacology Department  
La Paz University Hospital. IdiPAZ  
Autonomous University of Madrid

Jesús Frías Iniesta, MD, PhD  
Clinical Pharmacology Department  
La Paz University Hospital, IdiPAZ  
Autonomous University of Madrid

1  
2 Antonio J. Carcas, MD, PhD \*  
3 Clinical Pharmacology Department  
4 La Paz University Hospital, IdiPAZ  
5 Autonomous University of Madrid  
6

7 Alberto M. Borobia, MD, PhD \*  
8 Clinical Pharmacology Department  
9 La Paz University Hospital, IdiPAZ  
10 Autonomous University of Madrid  
11 Spanish Clinical Research Network (SCReN)  
12

13 † Equal contribution

14 \* Corresponding authors  
15  
16  
17  
18

### 19 **Corresponding author**

20  
21 Alberto M. Borobia, Antonio J. Carcas  
22 Clinical Pharmacology Department  
23 La Paz University Hospital  
24 Paseo de la Castellana, 261  
25 28046-Madrid  
26 Telephone and FAX: +34-912071466  
27 Mail: [alberto.borobia@salud.madrid.org](mailto:alberto.borobia@salud.madrid.org); [antonio.carcas@uam.es](mailto:antonio.carcas@uam.es)  
28  
29  
30

### 31 **WORD COUNTS**

32 Main text: 4020 words

33 Abstract: 297 words  
34  
35  
36  
37  
38  
39  
40  
41  
42  
43  
44  
45  
46  
47  
48  
49  
50  
51  
52  
53  
54  
55  
56  
57  
58  
59  
60

## ABSTRACT

**Introduction:** Invasive aspergillosis is the most important cause of morbidity and mortality in patients with haematological diseases. At present, voriconazole is the first-line treatment for invasive fungal disease. The pharmacokinetic interindividual variability of voriconazole depends on genetic factors. CYP450 is involved in 70%–75% of total metabolism of voriconazole, mainly CYP3A4 and CYP2C19, with the remaining 25%–30% of metabolism conducted by monooxygenase flavins. CYP2C19 single nucleotide polymorphisms could explain 50%–55% of variability in voriconazole metabolism.

**Materials and Methods:** The main objective is to compare efficiency of pre-emptive voriconazole genotyping with routine practice. The primary outcome is serum voriconazole on the fifth day within the therapeutic range. The secondary outcome is the combined variables of therapeutic failure and adverse events within 90 days of first administration, associated with voriconazole. A total of 146 patients at risk of invasive aspergillosis who will potentially receive voriconazole will be recruited, and CYP2C19 will be genotyped. If the patient ultimately receives voriconazole, they will be randomised (1:1 experimental/control). In the experimental arm, patients will receive a dose according to a pharmacogenetic algorithm, including CYP2C19 genotype and clinical and demographic information. In the control arm, patients will receive a dose according to clinical practice guidelines. In addition, a Spanish National Healthcare System (NHS) point-of-view cost-effectiveness evaluation will be performed. Direct cost calculations for each arm will be performed.

**Conclusion:** This trial will provide information about the viability and cost-effectiveness of the implementation of a pre-emptive voriconazole genotyping strategy in the Spanish NHS.

**Ethics and dissemination:** A Spanish version of this protocol has been evaluated and approved by the La Paz University Hospital Ethics Committee and the Spanish Agency of Medicines and Medical Devices. Trial results will be submitted for publication in an open peer-reviewed medical speciality-specific publication. Eudra-CT: 2019-000376-41. ClinicalTrials: NCT04238884

## STRENGTHS AND LIMITATIONS OF THIS STUDY

- (1) The study will be randomised, with objective variables and not influenced by placebo effect (voriconazole serum level).
- (2) The effectiveness and safety related to serum voriconazole is well known.
- (3) For patients in this study, there is little risk compared with routine clinical practice.
- (4) The study is single-blinded.
- (5) Our results depend on the frequency of CYP2C19 polymorphism.

## INTRODUCTION:

Invasive aspergillosis is the most important cause of morbidity and mortality in patients with haematological diseases. The most recent epidemiologic studies show an incidence of probable or proven invasive aspergillosis in patients with high-risk haematological diseases of 6%–11% [1][2]. Mortality due to this complication in patients with acute leukaemia is 27% [1], and up to 40% if we include every malignant haematologic disease [3]. In recent years, great advances in the treatment of this pathology have been made, which have improved the prognosis of haematologic diseases. However, high morbidity and mortality associated with infectious complications continue to be a medical problem. As a result, improving the prognosis for invasive fungal disease has great scientific interest, with aspergillosis being the most prevalent form.

At present, voriconazole is the first-line treatment for invasive fungal disease (1-grade evidence, A-grade recommendation) [4][5]. It is a third-generation triazole antifungal with broad-spectrum activity. Achieving voriconazole serum levels in the therapeutic range during the first treatment week improves the prognosis of fungal infection and the tolerability of the treatment by reducing dose-dependent adverse effects (AEs) [6]. The AE reduction, associated with posology optimization, decreases the amount of withdrawals of this antifungal drug.

Genetic variations could become markers that help us predict the pharmacological response depending on whether they are present and on their interrelationship with other markers associated with clinical response. In recent years, several groups and organisations have published evidence assessment systems, guidelines, systematic reviews and evaluations for various drugs and pathologies; in some cases, genotyping prior to treatment with various drugs has been shown to be cost-efficient [7].

Focusing on voriconazole, its pharmacokinetic interindividual variability depends on genetic factors [8]. CYP450 is involved in 70%–75% of the total metabolism of voriconazole, mainly CYP3A4 and CYP2C19, with the remaining 25%–30% of metabolism conducted by monooxygenase flavins. CYP2C19 single nucleotide polymorphisms could explain 50%–55% of variability in voriconazole metabolism. Some 5%–17% of patients are ultrafast metabolisers (CYP2C19\*17/\*17), and approximately 25%–33% of patients are fast metabolisers (CYP2C19\*1/\*17). Both are associated with a high risk of not achieving therapeutic levels for invasive aspergillosis [9][10]. Pharmacogenetics information oriented to dose adjustment is present in European dosing guidelines and in FDA recommendations, in which recommendations are given according to genotype [8]. This information must be known by every physician in order to reduce adverse effects, improve effectiveness and thus raise patient compliance by reducing morbidity and mortality.



1  
2 We propose a pragmatic clinical trial to evaluate the effectiveness and efficiency of a pre-emptive  
3 genotyping strategy of biomarkers related to the voriconazole response in patients with  
4 haematological disease who are at risk of suffering an infection susceptible to treatment with  
5 voriconazole.  
6  
7

## 8 9 **METHODS AND ANALYSIS**

### 10 11 **Study design**

12  
13  
14 VORIGENIPHARM is an acronym (VORIconazole PHARMacoGENetics) of the clinical trial with  
15 code EUDRA-CT: 2019-000376-41, funded by the Spanish Health Research and Development  
16 Strategy. It is a phase IV pragmatic, multicentre, randomised, single-blind, parallel arm, centre-  
17 stratified clinical trial. A total of 146 patients at risk of invasive aspergillosis who will potentially  
18 receive voriconazole will be recruited, and CYP2C19 alleles will be genotyped. The patients who  
19 ultimately receive voriconazole will be randomised to receive the dose according to a  
20 pharmacogenetic algorithm, including the CYP2C19 genotype and clinical and demographic  
21 information, or according to clinical practice (Figure 1).  
22  
23  
24  
25  
26  
27  
28  
29  
30

### 31 **Study objectives**

#### 32 General objective:

33  
34  
35  
36  
37 Evaluating the effectiveness and efficiency of a pre-emptive genotyping strategy for voriconazole in  
38 treatment and prophylaxis of *Aspergillus* fungal infections in patients with haematological diseases.  
39

#### 40 Primary objective:

- 41  
42  
43  
44  
45  
46  
47  
48  
49
- Evaluate the effectiveness of a pre-emptive genotyping strategy for voriconazole in achieving adequate therapeutic levels in haematological patients at risk of fungal infection compared with routine clinical practice.

#### 50 Secondary objectives:

- 51  
52  
53  
54  
55  
56  
57  
58  
59  
60
- Evaluate the safety of pre-emptive genotyping of voriconazole in haematological patients at risk of fungal infection, comparing it with routine clinical practice.
  - Evaluate the efficiency of this pre-emptive genotyping strategy. By mean of a cost-effectiveness analysis. Cost includes the mean total direct cost per patient, also including the cost of adverse events. The effectiveness will be measured as a combined variable of therapeutic failure described in the outcomes section.

1  
2  
3  
4  
5  
6  
7  
8  
9  
10  
11  
12  
13  
14  
15  
16  
17  
18  
19  
20  
21  
22  
23  
24  
25  
26  
27  
28  
29  
30  
31  
32  
33  
34  
35  
36  
37  
38  
39  
40  
41  
42  
43  
44  
45  
46  
47  
48  
49  
50  
51  
52  
53  
54  
55  
56  
57  
58  
59  
60

## Eligibility

The patient will be selected from La Paz University Hospital Paediatrics Hemato-Oncology Department, La Paz University Hospital Haematology Department, La Princesa University Hospital Adult Hematology Department and Gomez-Ulla University Hospital Adult Hematology Department. They will include children and adults who meet the following inclusion criteria:

- 1) Risk of developing invasive aspergillosis who are potentially eligible for treatment or prophylaxis with voriconazole:
  - a. Paediatric population: children undergoing haematopoietic stem cell transplantation, with acute myeloid leukaemia, as well as their relapses.
  - b. Adult population: patients diagnosed with acute leukaemia and those with long-term expected neutropaenia secondary to haematological disease and/or undergoing specific treatment (e.g., aplastic anaemia and variants, myelodysplastic syndrome, solid organ or bone marrow transplantation), and patients who the clinician in charge considers might be at risk of developing fungal infection.
- 2) Accepting participation in the study by signing the informed consent (adult patients), or minor patients whose representative/legal guardian has willingly signed the informed consent. In the case of mature minors (12–17 years of age), in addition to the consent signed by the legal guardian, the minor's assent shall be obtained.

The exclusion criteria are as follows:

- 1) Patients who for any reason should not be included in the study as assessed by the research team.
- 2) Patients who are not capable of understanding the information form and are unable to sign the informed consent document.

All patients eligible to receive voriconazole will sign an informed consent document for their participation in the clinical trial and for the collection of blood samples destined for genetic studies. They will also be asked for their consent to store an aliquot of their DNA for future studies (i.e., mass

sequencing). Patients identified in this phase will be randomised if and when they receive voriconazole.

## Randomisation

Patients who meet all inclusion and no exclusion criteria, who have signed the informed consent and will receive voriconazole will be randomised, stratified by centres. The randomisation sequence was created using SAS version 9.4 statistical software (procedure 'PROC PLAN') with a 1:1 allocation. No randomisation seed was specified. The randomisation seed was generated taking the hour of the computer where the program was executed. Randomization will be done centrally through the electronic CRF (MACRO®) in order to conceal the sequence until interventions are assigned.

## Masking

The study is single blind, and under no circumstance does the patient know the group to which they have been assigned. The medical researchers are unaware of the randomization scheme. Although there is a risk of unmasking the patient, and the lack of masking for the physician could affect the evaluation variables, we believe that in this clinical trial is permissible since the primary variable is an objective one (voriconazol concentration), and a total masking is not feasible in a study using a pragmatic approach.

## Outcomes

### Primary outcome

Serum voriconazole levels in the range of 1–5.5 µg/mL on the fifth day, according to the British Society for Medical Mycology, which is a subrogated variable strongly related to effectiveness and safety, with high-level evidence [11].

### Secondary outcomes

- A combined variable of therapeutic failure and AEs occurring within 90 days of first voriconazole administration.
  - Therapeutic failure is defined following EORTC consensus [12]:
    - Patients with probable or proven invasive aspergillosis: drug change or association because of poor clinical or radiological evolution of the disease.

- Patients who received prophylactic treatment: the necessity of change because of probable or proven invasive fungal disease.
  - Adverse event: Dose-dependent drug AEs, including visual disturbances (e.g., photopsia), skin reactions, neurotoxicity (e.g., confusion and visual hallucinations) and QTc lengthening, requiring voriconazole withdrawal.
- Costs by AE
  - Cost savings by AE
  - Quality-adjusted life years.

## Study procedures

The study visits and procedures will be performed as shown in Table 1.

- Selection visit: After confirming the selection criteria, informing the patient and signing the informed consent document, a blood sample will be taken for genetic analysis. Patients who have not received voriconazole within 3 months of recruitment will not be considered for randomisation, but will be considered for economic evaluation. Patients who, in this 3-month period, receive voriconazole will continue to the randomisation visit.
- Randomisation visit: The patient will be randomised to one of the two branches of the study:
  - Experimental group: based on the genetic study performed and the patient's characteristics (age, weight, indication), the Pharmacogenetics Unit of La Paz University Hospital will indicate the dose to be administered. The dose will be based on the therapeutic individualisation protocol guided by pharmacogenetics, as agreed by all clinical services, and which includes the recommendations of the Clinical Pharmacogenetics Implementation Consortium guide (Moriyana, 2016) and the study by Hicks et al (Hicks, 2014). In the experimental group arm, in cases of patients with rapid, ultrafast or slow metaboliser phenotypes, a determination of serum voriconazole concentrations at 48 hours (+/- 24 hours) may be considered, which will make a dose adjustment possible if required.
  - Control group: No information will be provided and the procedure will be performed according to normal clinical practice, with clinical monitoring by the doctor in charge. In both cases, the request for serum voriconazole levels for subsequent dose adjustment will be recommended, as is standard clinical practice, in accordance with the recommendations of the British Society for Medical Mycology (Ashbee, 2014).
- Primary outcome evaluation visit: Voriconazole concentrations will be measured on no later than the fifth day after the start of treatment ( $\pm 1$  day); if a dose adjustment is necessary, this

1  
2 will be performed according to the criteria of the attending clinician (control group) or the  
3 Pharmacogenetic Unit (experimental group); subsequent monitoring (determination of  
4 concentrations and dose adjustment) will be performed according to the criteria of the  
5 attending clinician in both arms.  
6  
7

- 8 • Follow-up visits: While the patient is being treated with voriconazole, follow-up visits will be  
9 made according to clinical criteria, and the following information will be recorded:
  - 10 ○ Evaluation of potential voriconazole-related clinical AEs (see evaluation variables).  
11 This will be performed by asking the patient questions, performing a physical  
12 examination, routine tests (including liver enzymes) and an electrocardiogram.
  - 13 ○ Voriconazole levels, if requested according to medical criteria.
  - 14 ○ The type of consultation will be recorded: outpatient appointment, urgent episode,  
15 admission, readmission or phone call.
- 16 • End-of-treatment visit: Performed on the last day the patient receives treatment with  
17 voriconazole, including the following procedures:
  - 18 ○ A reason for the end of treatment will be indicated (withdrawal due to toxicity or  
19 therapeutic failure, or after completion of treatment according to clinical criteria of  
20 efficacy)
  - 21 ○ Evaluation of potentially voriconazole-related clinical adverse events, as in follow-up  
22 visits.
  - 23 ○ If the patient continues voriconazole treatment beyond 3 months, the end of study  
24 visit will be made at that time.
- 25 • End-of-study visit: the end-of-study visit will coincide with the end-of-treatment visit, except  
26 for those patients who are still undergoing treatment after 3 months. A safety analysis,  
27 electrocardiogram, and assessment of adverse events will be performed. Patients who  
28 continue treatment beyond this visit will be followed according to routine clinical practice.  
29  
30  
31  
32  
33  
34  
35  
36  
37  
38  
39  
40  
41  
42

### 43 **Voriconazole genotyping and therapeutic drug monitoring**

44  
45 Genotyping will be performed at the Institute of Medical and Molecular Genetics at La Paz University  
46 Hospital using the self-designed SNP-array device (PharmArray v.2.), which makes genotyping of  
47 180 relevant mutations possible for predicting the response to drugs. Among these mutations are  
48 the most relevant variants of CYP2C19, a gene that is related to serum levels of voriconazole, with  
49 a level of evidence 1A of CPIC: CYP2C19\*2 (rs4244285), CYP2C19\*3 (rs4986893) and  
50 CYP2C19\*17 (rs12248560).  
51  
52  
53  
54  
55  
56  
57  
58  
59  
60

1  
2 Serum voriconazole determinations will be tested at the Therapeutic Drug Monitoring Laboratory of  
3 the Clinical Pharmacology Service at La Paz University Hospital using an enzyme immunosensing  
4 technique on the Abbott ARCHITECT c4000 autoanalyser.  
5  
6  
7

## 8 **Data collection and outcome measures**

9

10 A electronic case report form has been designed using MACRO Electronic Data Capture by Elsevier.  
11 This system will anonymise patients, and the data will be transferred to a '\*.csv' file in order to  
12 analyse it with R software (3.5.2 version or newer). To ensure the quality of the data, Data  
13 management will be performed by the Spanish Clinical Research Network (SCReN). Data  
14 management plan have been approved by the principal investigator and the sponsor. Data collection  
15 forms will be included in the final report.  
16  
17  
18  
19  
20

## 21 **Sample size calculation**

22

23 In routine clinical practice, 43% of patients have voriconazole serum levels in the therapeutic range  
24 on the fifth day of treatment. We expect this to improve to 68%, based on the Hicks article [9]. With  
25 a two-tailed type I error of 0.05 and 80% power, it is necessary to recruit 62 patients to receive  
26 treatment in both arms. 85 out of every 100 patients recruited are estimated to will receive  
27 voriconazole, we will need a total of 146 patients from whom we obtain informed consent. This  
28 calculation has been performed with the 'power.prop.test' package, from R version 3.2.0. The  
29 necessary time to recruit the whole group is estimated to be 2 years. We estimate 20% of the patients  
30 will be selected from the La Princesa University Hospital Adult Haematology Department, and 20%  
31 from the Gomez-Ulla University Hospital Adult Haematology Department. The rest of group will be  
32 recruited from La Paz University Hospital. Since it is a phase IV clinical trial including patients that  
33 are usually followed in the hospital, with pragmatic selection criteria, it is not necessary to plan any  
34 strategy for achieving adequate participant enrolment.  
35  
36  
37  
38  
39  
40  
41  
42  
43

## 44 **Statistical analysis**

45

46 Frequency results will be expressed in absolute terms, as percentages and confidence intervals.  
47 Continuous variables will be expressed as mean (SD) and median (range) according to Kolmogorov  
48 Smirnov's test of normality.  
49  
50  
51

52 For the main dichotomous variable (level of voriconazole within the therapeutic range) a generalised  
53 logistic model will be used. After that, "elastic net" techniques will be employed with the purpose of  
54 selecting variables so that they are not as rigid as in Lasso's case. Variables with some degree of  
55 correlation between themselves will be accepted in the model, as in Ridge regression, aiming at the  
56 best possible predictive model. Finally, more advanced methods of statistical learning will be used  
57 to give the variables consistency by the method described above. Predictive ability will be calculated  
58  
59  
60

1  
2 using receiver operating characteristic curves both at a specific time and over the course of the  
3 patient's follow-up.  
4

5  
6 A survival analysis will be performed for the secondary variables to test the Cox proportional hazards  
7 model and the Weibull model, analysing the time until the first event, using Kaplan Meier curves. A  
8 penalised Cox regression will be fitted to determine whether there are differences from the start of  
9 the target drug to the appearance of the event (secondary variable) between the control group and  
10 the experimental group, and finally, if possible the Weibull model will be used. A cross-validation  
11 approach will be used, dividing the sample into k subgroups. Later, a subgroup analysis will be  
12 performed taking into consideration the recruiting centre, calculating the *a posteriori* analysis power  
13 of every objective, given that this can be a source of hypothesis generation for future research lines.  
14  
15

16  
17 The analysis of the primary variable of efficacy will be made on an intention-to-treat (ITT) basis. It  
18 will include all the patients who are randomized, whether they have received the study treatment or  
19 not. The safety analyses will be held in the safety population, which includes patients who receive at  
20 least one dose of the drug during the study. No interim analysis or stopping rules will be carry out in  
21 this clinical trial.  
22  
23

24  
25 A bilateral significance level of 0.05 and bilateral 95% confidence intervals will be assumed. The  
26 statistical software R (R Core Team [2014]) will be used. R: A language and environment for  
27 statistical computing. R Foundation for Statistical Computing, Vienna, Austria.  
28  
29

### 30 **Economic evaluation**

31  
32 A Spanish National Healthcare Service (NHS) point-of-view cost-effectiveness evaluation will be  
33 performed. Direct cost calculations for each arm will be performed.  
34

35  
36 Direct costs will be calculated for both alternatives by registering healthcare resources used during  
37 the follow-up and the unit cost per patient, as well as the costs incurred by the centres to implement  
38 the intervention.  
39  
40

41  
42 The use of resources and their unit costs, such as doctor's visits, medications and any interventions  
43 performed on those patients in the hospital during follow-up shall be recorded. Costs for each patient  
44 for each intervention group will be totalled. This calculation will allow us to compare the average cost  
45 per event avoided between the intervention group and the control group. The results will be  
46 expressed in cost per event and avoided events. As far as possible, the utility of each intervention  
47 should be calculated.  
48  
49

50  
51 A univariate and a probabilistic sensitivity analysis will be performed to assess the uncertainty about  
52 the model and the unit costs, if they are obtained from a source other than the clinical centres.  
53  
54  
55  
56  
57  
58  
59  
60

## **Data monitoring**

Coordination, management, monitoring, data management and statistical analysis of the study will be performed by the Spanish Clinical Research Network (SCReN).

## **Auditing**

During the progress of the study, audit visits can be conducted at the participating centres. The investigator will allow direct access to the source data/documents for monitoring, auditing, review by the ethical research committee and inspection by the Health Authorities

## **Conflicts of Interest**

The Funders and Sponsor not interfere in the selection processes of the patients, analysis of the data and/or publication of the results, or any other process that might come into play with the results of the study. Funding will be independent of the results of the study. The Principal Investigator has ultimate authority over any of these activities.

## **Patient and Public Involvement**

The development of the research question and outcome measures were based on the oncologists' experience treating this profile of patients the desire to optimize voriconazol treatment. Patients and patient advisers were not involved in the design, recruitment or conduct of this study. The patients or their families will be notified of the study results in writing and verbally, and we will invite them to help us develop our dissemination strategy.

## **Access to data.**

This section is included in the data sharing plan.

## **Dissemination policy**

Outputs from this study will include journal publications, conference presentations and community reporting. Outputs will not identify participants.

## **Ethical considerations**

The researchers will adhere strictly to the provisions of this protocol and will complete the case report forms. The study will be performed according to the recommendations for clinical studies and the evaluation of drugs in humans, as contained in the Declaration of Helsinki (revised in successive world assemblies) and in the current Spanish and European legislation on clinical studies and patient



1 data confidentiality. The study will follow the principles of Good Clinical Practice. This study has been  
2 approved by the Clinical Research Ethics Committee of La Paz University Hospital (Madrid, Spain)  
3 and by the Spanish Agency of Medication and Health Products, and has been registered in Eudra  
4 CT (Eudra CT: 2019-000376-41) and ClinicalTrials.gov (NCT04238884).  
5  
6  
7  
8

9 This clinical trial has been classified by the Spanish Agency for Medicines and Healthcare Products  
10 as a "low-intervention clinical trial". The additional diagnostic or monitoring procedures do not pose  
11 more than minimal additional risk or burden to the safety of the subjects compared to normal clinical.  
12  
13  
14

15 No additional use of the system for compensation shall be required from the sponsor for low-  
16 intervention clinical trials. If any possible damage that could be suffered by a subject, resulting from  
17 the use of the investigational medicinal product in accordance with the protocol of that specific clinical  
18 trial, it is covered by the applicable compensation system already in place.  
19  
20  
21  
22

23 All protocol amendments will be evaluated by the Ethics Committee and the Spanish Agency of  
24 Medication and Health Products, following the principles of Good Clinical Practice and national  
25 legislation.  
26  
27

## 28 **DISCUSSION**

29  
30  
31 Some important barriers have been detected to implementation of pharmacogenetics in usual clinical  
32 practice. The reasons detected in the literature include the difficulty of obtaining high-level evidence  
33 on genetic markers' efficacy, effectivity and efficiency, and a lack of consensus. Another problem is  
34 the absence of pharmacogenetic techniques' formation and its interpretation. We also have to  
35 consider the financial, logistic and legal limitations. Finally, there is no specific implementation  
36 strategy in clinical practice. There have been two proposed models for the implementation of  
37 pharmacogenetics biomarkers in usual clinical practice:  
38  
39  
40  
41  
42

- 43 • Case-to-case model: The decision is made individually and is based on the need for using a  
44 drug whose effectiveness or safety is modified by specific genetics variations. The limitations  
45 are the costs and the latency between sample extraction and the results obtained.  
46  
47
- 48 • Pre-emptive genotyping model: This alternative assesses the patient's genetic information at  
49 the very beginning, even before starting treatment. Currently, the development of arrays  
50 permits detection of a significant number of mutations in which therapeutic impact is probable  
51 or definite. Other authors have developed a similar strategy [11][12], for instance St. Jude's  
52 Hospital [13], as well as our group [14]. Rasmussen-Torvik's group has proposed the  
53 eMERGE-PGx project, in which pre-emptive pharmacogenotyping is integrated with clinical  
54 history [15].  
55  
56  
57  
58  
59  
60

1  
2 In the case of voriconazole, several studies have linked CYP2C19 polymorphism to the response.  
3 In addition, some studies have shown that genotyping CYP2C19 is effective. The cost-efficiency of  
4 pre-treatment genotyping in some drugs has been already demonstrated in some articles [7];  
5 however, there is no evidence of voriconazole efficiency specifically in the Spanish NHS, or even  
6 whether voriconazole-related cytochrome genotyping is efficient in other countries [16].  
7  
8  
9

10  
11 This pragmatic clinical trial is proposed by our group to evaluate effectiveness and efficiency of pre-  
12 emptive biomarker genotyping and its interpretation by a Pharmacogenetic Unit for patients with  
13 haematological diseases and a risk of fungal infection, who are susceptible to receiving voriconazole  
14 treatment. If our hypothesis is proven, this strategy will help us improve the prevention and treatment  
15 of this infectious complication. This trial will provide information about the viability of the translation  
16 of this strategy to routine clinical practice. In addition, our pre-emptive pharmacogenetic strategy,  
17 combined with therapeutic drug monitoring, has the potential to improve efficacy and safety, with a  
18 high level of evidence [6], lowering the likelihood of AE occurrences.  
19  
20  
21  
22  
23

### 24 **Author contributions**

25  
26  
27 AMB, AJC and JFI conceived the study. JMV, IG, FAS, CA, GM, ER, JFI, AJC and AMB designed  
28 the study. DB, RC, ME, AL and MJO are responsible of the data collecting and management. JMV  
29 and IG drafted this manuscript. AMB, AJC and JFI critically revised the manuscript. JMV and IG  
30 contributed equally. The final version of the manuscript was reviewed and approved by all authors.  
31  
32  
33  
34

### 35 **Competing interests**

36  
37  
38 None declared.  
39

### 40 **Funding statement**

41  
42  
43 This clinical trial has been funded by the Instituto de Salud Carlos III (ISCIII), Minister of Innovation  
44 and Science of Spain in a competitive and public grant (Research Projects 2018, Spanish Health  
45 Research and Development Strategy). Project code: PI18/01322.  
46  
47  
48  
49  
50  
51  
52  
53  
54  
55  
56  
57  
58  
59  
60

**REFERENCES:**

- [1] Koehler P et al. Epidemiology of invasive aspergillosis and azole resistance in patients with acute leukaemia: the SEPIA Study. *Int J Antimicrob Agents*. 2017 Feb;49(2):218-223. doi: 10.1016/j.ijantimicag.2016.10.019
- [2] Lestrade PP et al. Epidemiology of invasive aspergillosis and triazole-resistant *Aspergillus fumigatus* in patients with haematological malignancies: a single-centre retrospective cohort study. *J Antimicrob Chemother*. 2018 Jan 31. doi: 10.1093/jac/dkx527
- [3] Pagano L et al. The epidemiology of fungal infections in patients with hematologic malignancies: the SEIFEM-2004 study. *Haematologica*. 2006 Aug;91(8):1068-75.
- [4] Fortún J et al. Recomendaciones sobre el tratamiento de la enfermedad fúngica invasiva por *Aspergillus* spp. y otros hongos filamentosos de la Sociedad Española de Enfermedades Infecciosas y Microbiología Clínica (SEIMC). Actualización 2011. *Enferm Infecc Microbiol Clin*. 2011;29(6):435-454
- [5] Patterson TF et al. Practice Guidelines for the Diagnosis and Management of Aspergillosis: 2016 Update by the Infectious Diseases Society of America. *CID* 2016:63
- [6] Ashbee HR et al. Therapeutic drug monitoring (TDM) of antifungal agents: guidelines from the British Society for Medical Mycology. *J Antimicrob Chemother*. 2014 May;69(5):1162-76. doi: 10.1093/jac/dkt508. Epub 2013 Dec 29
- [7] Plumpton, C., Roberts, D., Pirmohamed, M. and Hughes, D. (2016). A Systematic Review of Economic Evaluations of Pharmacogenetic Testing for Prevention of Adverse Drug Reactions. *PharmacoEconomics*, 34(8), pp.771-793.
- [8] Moriyama B, et al. Clinical Pharmacogenetics Implementation Consortium (CPIC) Guidelines for CYP2C19 and Voriconazole Therapy. *Clin Pharmacol Ther*. 2016 Dec 16. doi: 10.1002/cpt.583.
- [9] Hicks JK et al. Voriconazole plasma concentrations in immunocompromised pediatric patients vary by CYP2C19 diplotypes. *Pharmacogenomics*. 2014 Jun;15(8):1065-78
- [10] Dapía I, García I, Martínez J, Arias P, Guerra P, Díaz L et al. Prediction Models for Voriconazole Pharmacokinetics Based on Pharmacogenetics: An Exploratory Study in Spanish population. *International Journal of Antimicrobial Agents*. 2019
- [11] Pulley, J.M. et al. Operational implementation of prospective genotyping for personalized medicine: the design of the Vanderbilt PREDICT project. *Clin. Pharmacol. Ther* 2012; 92:87 -95;

1  
2 [12] Bielinski S, Olson J, Pathak J, Weinshilboum R, Wang L, Lyke K et al. Preemptive Genotyping  
3 for Personalized Medicine: Design of the Right Drug, Right Dose, Right Time—Using Genomic Data  
4 to Individualize Treatment Protocol. *Mayo Clinic Proceedings*. 2014;89(1):25-33.  
5  
6

7  
8 [13] Crews KR et al. Pharmacogenomics and Individualized Medicine: Translating Science Into  
9 Practice. *Clin Pharmacol Ther* 2012; 92:467-75  
10

11  
12 [14] Borobia AM. et al (2017), Clinical Implementation of Pharmacogenetic Testing in a Hospital of  
13 the Spanish National Health System: Strategy and Experience Over 3 Years. *Clinical And*  
14 *Translational Science*. doi:10.1111/cts.12526  
15  
16

17  
18 [15] Rasmussen-Torvik LJ et al. Design and anticipated outcomes of the eMERGE-PGx project: a  
19 multicenter pilot for preemptive pharmacogenomics in electronic health record systems. *Clin*  
20 *Pharmacol Ther*. 2014 Oct;96(4):482-9. doi: 10.1038/clpt.2014.137.  
21  
22

23  
24  
25  
26 [16] García I, Carcas A, Borobia A. Strategy to effectively and efficiently implement voriconazole  
27 pharmacogenetics in clinical practice. *Pharmacogenomics*. 2020 Jun 3. doi: 10.2217/pgs-2020-  
28 0029. Online ahead of print  
29  
30  
31  
32  
33  
34  
35  
36  
37  
38  
39  
40  
41  
42  
43  
44  
45  
46  
47  
48  
49  
50  
51  
52  
53  
54  
55  
56  
57  
58  
59  
60

| VISIT                        | Visit of selection | Visit of randomisation           | Primary outcome evaluation (visit) | Follow-up visit               | End-of-treatment visit | End-of-study visit                                  |
|------------------------------|--------------------|----------------------------------|------------------------------------|-------------------------------|------------------------|-----------------------------------------------------|
| Day of the study             | Day 0              | Maximum 3 months after selection | 5th day of treatment (+/- 1 day)   | Weekly until end of treatment | Last day of treatment  | 2 weeks later after ending treatment <sup>(1)</sup> |
| Selection criteria meeting   | X                  |                                  |                                    |                               |                        |                                                     |
| Informed Consent Signing     | X                  |                                  |                                    |                               |                        |                                                     |
| Genetic sample               | X                  |                                  |                                    |                               |                        |                                                     |
| Randomisation                |                    | X                                |                                    |                               |                        |                                                     |
| Starting treatment           |                    | X                                |                                    |                               |                        |                                                     |
| Voriconazole serum levels    |                    |                                  | X                                  | X <sup>(2)</sup>              |                        |                                                     |
| Lab analysis <sup>(3)</sup>  |                    | X                                | X                                  | X                             | X                      | X                                                   |
| Electrocardiogram            |                    | X                                | X                                  | X                             | X                      | X                                                   |
| AE <sup>(4)</sup> evaluation |                    | X                                | X                                  | X                             | X                      | X                                                   |

(1) Patients who after 3 months continue being treated, End-of-study visit will be done on the last day of third month.

(2) According to physician criteria

(3) Analysis including liver enzymes.

(4) AE (Adverse Events)

Table1. Study visits planning and study procedures.

## Figure legend

Figure 1. Study Flowchart.

Proposed reporting of the flow of trial participants.



Figure 1. Study Flowchart

Figure 1. Study flowchart

## APPENDIX 1: Trial Investigation Group

- Trial coordination: Alberto M. Borobia, MD, PhD; Antonio J. Carcas, MD, PhD.
- Clinical Researches:
  - La Paz University Hospital:
    - Clinical Pharmacology Department: Jaime Monserrat-Villatoro, MD; Irene Garcia, MD; Elena Ramírez, MD, PhD; Jesús Frías Iniesta, MD, PhD.
    - Pediatric Onco-Haematology Department: David Bueno, MD, PhD.
    - Haematology Department: Ana Lopez, MD, PhD; Teresa de Soto, MD
  - La Princesa University Hospital:
    - Haematology Department: Rafael de la Camara, MD, PD.
    - Clinical Pharmacology Department: Francisco Abad Santos, MD, PhD; Gina Mejia, MD, PhD.
  - Gómez Ulla Hospital:
    - Infectious Diseases. Internal Medicine Department: Miriam Estébanez, MD, PhD.
    - Haematology Department: María José Otero, MD, PhD.
- Pharmacoeconomic analyses:
  - Francisco de Vitoria University - Health Technologies Assessment Department: Cristina Antón, MD, PhD.
- Study monitoring: Foundation for Biomedical Research, University Hospital La Paz: Central Unit for Clinical Research and Clinical Trials. SCReN.

## SPIRIT checklist.

| Included                            | Section/item               | Item No | Description                                                                                                                                                                                                                                                                              | Pg.    |
|-------------------------------------|----------------------------|---------|------------------------------------------------------------------------------------------------------------------------------------------------------------------------------------------------------------------------------------------------------------------------------------------|--------|
| <b>Administrative information</b>   |                            |         |                                                                                                                                                                                                                                                                                          |        |
| <input checked="" type="checkbox"/> | Title                      | 1       | Descriptive title identifying the study design, population, interventions, and, if applicable, trial acronym                                                                                                                                                                             | 1      |
| <input checked="" type="checkbox"/> | Trial registration         | 2a      | Trial identifier and registry name. If not yet registered, name of intended registry                                                                                                                                                                                                     | 1      |
| <input checked="" type="checkbox"/> |                            | 2b      | All items from the World Health Organization Trial Registration Data Set                                                                                                                                                                                                                 | 1-2    |
| <input checked="" type="checkbox"/> | Protocol version           | 3       | Date and version identifier                                                                                                                                                                                                                                                              | 1      |
| <input checked="" type="checkbox"/> | Funding                    | 4       | Sources and types of financial, material, and other support                                                                                                                                                                                                                              | 14     |
| <input checked="" type="checkbox"/> | Roles and responsibilities | 5a      | Names, affiliations, and roles of protocol contributors                                                                                                                                                                                                                                  | 16, 21 |
| <input checked="" type="checkbox"/> |                            | 5b      | Name and contact information for the trial sponsor                                                                                                                                                                                                                                       | 1      |
| <input checked="" type="checkbox"/> |                            | 5c      | Role of study sponsor and funders, if any, in study design; collection, management, analysis, and interpretation of data; writing of the report; and the decision to submit the report for publication, including whether they will have ultimate authority over any of these activities | 14     |
| <input checked="" type="checkbox"/> |                            | 5d      | Composition, roles, and responsibilities of the coordinating centre, steering committee, endpoint adjudication committee, data management team, and other individuals or groups overseeing the trial, if applicable (see Item 21a for data monitoring committee)                         | 14     |
| <b>Introduction</b>                 |                            |         |                                                                                                                                                                                                                                                                                          |        |
| <input checked="" type="checkbox"/> | Background and rationale   | 6a      | Description of research question and justification for undertaking the trial, including summary of relevant studies (published and unpublished) examining benefits and harms for each intervention                                                                                       | 6, 7   |
| <input checked="" type="checkbox"/> |                            | 6b      | Explanation for choice of comparators                                                                                                                                                                                                                                                    | 6, 7   |
| <input checked="" type="checkbox"/> | Objectives                 | 7       | Specific objectives or hypotheses                                                                                                                                                                                                                                                        | 8      |



|    |                                                           |                      |     |                                                                                                                                                                                                                                                                                                                                                                                |            |
|----|-----------------------------------------------------------|----------------------|-----|--------------------------------------------------------------------------------------------------------------------------------------------------------------------------------------------------------------------------------------------------------------------------------------------------------------------------------------------------------------------------------|------------|
| 1  | <input checked="" type="checkbox"/>                       | Trial design         | 8   | Description of trial design including type of trial (eg, parallel group, crossover, factorial, single group), allocation ratio, and framework (eg, superiority, equivalence, noninferiority, exploratory)                                                                                                                                                                      | 7          |
| 2  |                                                           |                      |     |                                                                                                                                                                                                                                                                                                                                                                                |            |
| 3  |                                                           |                      |     |                                                                                                                                                                                                                                                                                                                                                                                |            |
| 4  |                                                           |                      |     |                                                                                                                                                                                                                                                                                                                                                                                |            |
| 5  |                                                           |                      |     |                                                                                                                                                                                                                                                                                                                                                                                |            |
| 6  |                                                           |                      |     |                                                                                                                                                                                                                                                                                                                                                                                |            |
| 7  | <b>Methods: Participants, interventions, and outcomes</b> |                      |     |                                                                                                                                                                                                                                                                                                                                                                                | <b>Pg.</b> |
| 8  |                                                           |                      |     |                                                                                                                                                                                                                                                                                                                                                                                |            |
| 9  | <input checked="" type="checkbox"/>                       | Study setting        | 9   | Description of study settings (eg, community clinic, academic hospital) and list of countries where data will be collected. Reference to where list of study sites can be obtained                                                                                                                                                                                             | 8, 12      |
| 10 |                                                           |                      |     |                                                                                                                                                                                                                                                                                                                                                                                |            |
| 11 | <input checked="" type="checkbox"/>                       | Eligibility criteria | 10  | Inclusion and exclusion criteria for participants. If applicable, eligibility criteria for study centres and individuals who will perform the interventions (eg, surgeons, psychotherapists)                                                                                                                                                                                   | 8          |
| 12 |                                                           |                      |     |                                                                                                                                                                                                                                                                                                                                                                                |            |
| 13 |                                                           |                      |     |                                                                                                                                                                                                                                                                                                                                                                                |            |
| 14 | <input checked="" type="checkbox"/>                       | Interventions        | 11a | Interventions for each group with sufficient detail to allow replication, including how and when they will be administered                                                                                                                                                                                                                                                     | 10, 11     |
| 15 |                                                           |                      |     |                                                                                                                                                                                                                                                                                                                                                                                |            |
| 16 | <input checked="" type="checkbox"/>                       |                      | 11b | Criteria for discontinuing or modifying allocated interventions for a given trial participant (eg, drug dose change in response to harms, participant request, or improving/worsening disease)                                                                                                                                                                                 | 11         |
| 17 |                                                           |                      |     |                                                                                                                                                                                                                                                                                                                                                                                |            |
| 18 |                                                           |                      |     |                                                                                                                                                                                                                                                                                                                                                                                |            |
| 19 |                                                           |                      |     |                                                                                                                                                                                                                                                                                                                                                                                |            |
| 20 | <input checked="" type="checkbox"/>                       |                      | 11c | Strategies to improve adherence to intervention protocols, and any procedures for monitoring adherence (eg, drug tablet return, laboratory tests)                                                                                                                                                                                                                              | 11, 12     |
| 21 |                                                           |                      |     |                                                                                                                                                                                                                                                                                                                                                                                |            |
| 22 |                                                           |                      |     |                                                                                                                                                                                                                                                                                                                                                                                |            |
| 23 |                                                           |                      |     |                                                                                                                                                                                                                                                                                                                                                                                |            |
| 24 | <input checked="" type="checkbox"/>                       |                      | 11d | Relevant concomitant care and interventions that are permitted or prohibited during the trial                                                                                                                                                                                                                                                                                  | 7, 12, 16  |
| 25 |                                                           |                      |     |                                                                                                                                                                                                                                                                                                                                                                                |            |
| 26 |                                                           |                      |     |                                                                                                                                                                                                                                                                                                                                                                                |            |
| 27 | <input checked="" type="checkbox"/>                       | Outcomes             | 12  | Primary, secondary, and other outcomes, including the specific measurement variable (eg, systolic blood pressure), analysis metric (eg, change from baseline, final value, time to event), method of aggregation (eg, median, proportion), and time point for each outcome. Explanation of the clinical relevance of chosen efficacy and harm outcomes is strongly recommended | 9, 10      |
| 28 |                                                           |                      |     |                                                                                                                                                                                                                                                                                                                                                                                |            |
| 29 |                                                           |                      |     |                                                                                                                                                                                                                                                                                                                                                                                |            |
| 30 |                                                           |                      |     |                                                                                                                                                                                                                                                                                                                                                                                |            |
| 31 |                                                           |                      |     |                                                                                                                                                                                                                                                                                                                                                                                |            |
| 32 |                                                           |                      |     |                                                                                                                                                                                                                                                                                                                                                                                |            |
| 33 |                                                           |                      |     |                                                                                                                                                                                                                                                                                                                                                                                |            |
| 34 | <input checked="" type="checkbox"/>                       | Participant timeline | 13  | Time schedule of enrolment, interventions (including any run-ins and washouts), assessments, and visits for participants. A schematic diagram is highly recommended (see Figure)                                                                                                                                                                                               | 10,11,20   |
| 35 |                                                           |                      |     |                                                                                                                                                                                                                                                                                                                                                                                |            |
| 36 |                                                           |                      |     |                                                                                                                                                                                                                                                                                                                                                                                |            |
| 37 |                                                           |                      |     |                                                                                                                                                                                                                                                                                                                                                                                |            |
| 38 |                                                           |                      |     |                                                                                                                                                                                                                                                                                                                                                                                |            |
| 39 |                                                           |                      |     |                                                                                                                                                                                                                                                                                                                                                                                |            |
| 40 |                                                           |                      |     |                                                                                                                                                                                                                                                                                                                                                                                |            |
| 41 |                                                           |                      |     |                                                                                                                                                                                                                                                                                                                                                                                |            |
| 42 |                                                           |                      |     |                                                                                                                                                                                                                                                                                                                                                                                |            |
| 43 |                                                           |                      |     |                                                                                                                                                                                                                                                                                                                                                                                |            |
| 44 |                                                           |                      |     |                                                                                                                                                                                                                                                                                                                                                                                |            |
| 45 |                                                           |                      |     |                                                                                                                                                                                                                                                                                                                                                                                |            |
| 46 |                                                           |                      |     |                                                                                                                                                                                                                                                                                                                                                                                |            |
| 47 |                                                           |                      |     |                                                                                                                                                                                                                                                                                                                                                                                |            |
| 48 |                                                           |                      |     |                                                                                                                                                                                                                                                                                                                                                                                |            |
| 49 |                                                           |                      |     |                                                                                                                                                                                                                                                                                                                                                                                |            |
| 50 |                                                           |                      |     |                                                                                                                                                                                                                                                                                                                                                                                |            |
| 51 |                                                           |                      |     |                                                                                                                                                                                                                                                                                                                                                                                |            |
| 52 |                                                           |                      |     |                                                                                                                                                                                                                                                                                                                                                                                |            |
| 53 |                                                           |                      |     |                                                                                                                                                                                                                                                                                                                                                                                |            |
| 54 |                                                           |                      |     |                                                                                                                                                                                                                                                                                                                                                                                |            |
| 55 |                                                           |                      |     |                                                                                                                                                                                                                                                                                                                                                                                |            |
| 56 |                                                           |                      |     |                                                                                                                                                                                                                                                                                                                                                                                |            |
| 57 |                                                           |                      |     |                                                                                                                                                                                                                                                                                                                                                                                |            |
| 58 |                                                           |                      |     |                                                                                                                                                                                                                                                                                                                                                                                |            |
| 59 |                                                           |                      |     |                                                                                                                                                                                                                                                                                                                                                                                |            |
| 60 |                                                           |                      |     |                                                                                                                                                                                                                                                                                                                                                                                |            |

|    |                                                                     |                                  |     |                                                                                                                                                                                                                                                                                                                                                                                                              |               |
|----|---------------------------------------------------------------------|----------------------------------|-----|--------------------------------------------------------------------------------------------------------------------------------------------------------------------------------------------------------------------------------------------------------------------------------------------------------------------------------------------------------------------------------------------------------------|---------------|
| 1  | <input checked="" type="checkbox"/>                                 | Sample size                      | 14  | Estimated number of participants needed to achieve study objectives and how it was determined, including clinical and statistical assumptions supporting any sample size calculations                                                                                                                                                                                                                        | 12            |
| 2  |                                                                     |                                  |     |                                                                                                                                                                                                                                                                                                                                                                                                              |               |
| 3  | <input checked="" type="checkbox"/>                                 | Recruitment                      | 15  | Strategies for achieving adequate participant enrolment to reach target sample size                                                                                                                                                                                                                                                                                                                          | 12            |
| 4  |                                                                     |                                  |     |                                                                                                                                                                                                                                                                                                                                                                                                              |               |
| 5  |                                                                     |                                  |     |                                                                                                                                                                                                                                                                                                                                                                                                              |               |
| 6  |                                                                     |                                  |     |                                                                                                                                                                                                                                                                                                                                                                                                              |               |
| 7  |                                                                     |                                  |     |                                                                                                                                                                                                                                                                                                                                                                                                              |               |
| 8  |                                                                     |                                  |     |                                                                                                                                                                                                                                                                                                                                                                                                              |               |
| 9  |                                                                     |                                  |     |                                                                                                                                                                                                                                                                                                                                                                                                              |               |
| 10 |                                                                     |                                  |     |                                                                                                                                                                                                                                                                                                                                                                                                              |               |
| 11 | <b>Methods: Assignment of interventions (for controlled trials)</b> |                                  |     |                                                                                                                                                                                                                                                                                                                                                                                                              |               |
| 12 | Allocation:                                                         |                                  |     |                                                                                                                                                                                                                                                                                                                                                                                                              |               |
| 13 |                                                                     |                                  |     |                                                                                                                                                                                                                                                                                                                                                                                                              |               |
| 14 | <input checked="" type="checkbox"/>                                 | Sequence generation              | 16a | Method of generating the allocation sequence (eg, computer-generated random numbers), and list of any factors for stratification. To reduce predictability of a random sequence, details of any planned restriction (eg, blocking) should be provided in a separate document that is unavailable to those who enrol participants or assign interventions                                                     | 9             |
| 15 |                                                                     |                                  |     |                                                                                                                                                                                                                                                                                                                                                                                                              |               |
| 16 |                                                                     |                                  |     |                                                                                                                                                                                                                                                                                                                                                                                                              |               |
| 17 |                                                                     |                                  |     |                                                                                                                                                                                                                                                                                                                                                                                                              |               |
| 18 | <input checked="" type="checkbox"/>                                 | Allocation concealment mechanism | 16b | Mechanism of implementing the allocation sequence (eg, central telephone; sequentially numbered, opaque, sealed envelopes), describing any steps to conceal the sequence until interventions are assigned                                                                                                                                                                                                    | 9             |
| 19 |                                                                     |                                  |     |                                                                                                                                                                                                                                                                                                                                                                                                              |               |
| 20 |                                                                     |                                  |     |                                                                                                                                                                                                                                                                                                                                                                                                              |               |
| 21 |                                                                     |                                  |     |                                                                                                                                                                                                                                                                                                                                                                                                              |               |
| 22 |                                                                     |                                  |     |                                                                                                                                                                                                                                                                                                                                                                                                              |               |
| 23 |                                                                     |                                  |     |                                                                                                                                                                                                                                                                                                                                                                                                              |               |
| 24 |                                                                     |                                  |     |                                                                                                                                                                                                                                                                                                                                                                                                              |               |
| 25 |                                                                     |                                  |     |                                                                                                                                                                                                                                                                                                                                                                                                              |               |
| 26 |                                                                     |                                  |     |                                                                                                                                                                                                                                                                                                                                                                                                              |               |
| 27 | <input checked="" type="checkbox"/>                                 | Implementation                   | 16c | Who will generate the allocation sequence, who will enrol participants, and who will assign participants to interventions                                                                                                                                                                                                                                                                                    | 9, 10, 11, 21 |
| 28 |                                                                     |                                  |     |                                                                                                                                                                                                                                                                                                                                                                                                              |               |
| 29 |                                                                     |                                  |     |                                                                                                                                                                                                                                                                                                                                                                                                              |               |
| 30 |                                                                     |                                  |     |                                                                                                                                                                                                                                                                                                                                                                                                              |               |
| 31 |                                                                     |                                  |     |                                                                                                                                                                                                                                                                                                                                                                                                              |               |
| 32 |                                                                     |                                  |     |                                                                                                                                                                                                                                                                                                                                                                                                              |               |
| 33 |                                                                     |                                  |     |                                                                                                                                                                                                                                                                                                                                                                                                              |               |
| 34 | <input checked="" type="checkbox"/>                                 | Blinding (masking)               | 17a | Who will be blinded after assignment to interventions (eg, trial participants, care providers, outcome assessors, data analysts), and how                                                                                                                                                                                                                                                                    | 9             |
| 35 |                                                                     |                                  |     |                                                                                                                                                                                                                                                                                                                                                                                                              |               |
| 36 |                                                                     |                                  |     |                                                                                                                                                                                                                                                                                                                                                                                                              |               |
| 37 |                                                                     |                                  |     |                                                                                                                                                                                                                                                                                                                                                                                                              |               |
| 38 | <input checked="" type="checkbox"/>                                 |                                  | 17b | If blinded, circumstances under which unblinding is permissible, and procedure for revealing a participant's allocated intervention during the trial                                                                                                                                                                                                                                                         | 9             |
| 39 |                                                                     |                                  |     |                                                                                                                                                                                                                                                                                                                                                                                                              |               |
| 40 |                                                                     |                                  |     |                                                                                                                                                                                                                                                                                                                                                                                                              |               |
| 41 |                                                                     |                                  |     |                                                                                                                                                                                                                                                                                                                                                                                                              |               |
| 42 |                                                                     |                                  |     |                                                                                                                                                                                                                                                                                                                                                                                                              |               |
| 43 |                                                                     |                                  |     |                                                                                                                                                                                                                                                                                                                                                                                                              |               |
| 44 |                                                                     |                                  |     |                                                                                                                                                                                                                                                                                                                                                                                                              |               |
| 45 |                                                                     |                                  |     |                                                                                                                                                                                                                                                                                                                                                                                                              |               |
| 46 |                                                                     |                                  |     |                                                                                                                                                                                                                                                                                                                                                                                                              |               |
| 47 |                                                                     |                                  |     |                                                                                                                                                                                                                                                                                                                                                                                                              |               |
| 48 |                                                                     |                                  |     |                                                                                                                                                                                                                                                                                                                                                                                                              |               |
| 49 | <b>Methods: Data collection, management, and analysis</b>           |                                  |     |                                                                                                                                                                                                                                                                                                                                                                                                              |               |
| 50 |                                                                     |                                  |     |                                                                                                                                                                                                                                                                                                                                                                                                              |               |
| 51 | <input checked="" type="checkbox"/>                                 | Data collection methods          | 18a | Plans for assessment and collection of outcome, baseline, and other trial data, including any related processes to promote data quality (eg, duplicate measurements, training of assessors) and a description of study instruments (eg, questionnaires, laboratory tests) along with their reliability and validity, if known. Reference to where data collection forms can be found, if not in the protocol | 12            |
| 52 |                                                                     |                                  |     |                                                                                                                                                                                                                                                                                                                                                                                                              |               |
| 53 |                                                                     |                                  |     |                                                                                                                                                                                                                                                                                                                                                                                                              |               |
| 54 |                                                                     |                                  |     |                                                                                                                                                                                                                                                                                                                                                                                                              |               |
| 55 |                                                                     |                                  |     |                                                                                                                                                                                                                                                                                                                                                                                                              |               |
| 56 |                                                                     |                                  |     |                                                                                                                                                                                                                                                                                                                                                                                                              |               |
| 57 |                                                                     |                                  |     |                                                                                                                                                                                                                                                                                                                                                                                                              |               |
| 58 |                                                                     |                                  |     |                                                                                                                                                                                                                                                                                                                                                                                                              |               |
| 59 |                                                                     |                                  |     |                                                                                                                                                                                                                                                                                                                                                                                                              |               |
| 60 |                                                                     |                                  |     |                                                                                                                                                                                                                                                                                                                                                                                                              |               |

|    |                                     |                     |     |                                                                                                                                                                                                                                                                   |       |
|----|-------------------------------------|---------------------|-----|-------------------------------------------------------------------------------------------------------------------------------------------------------------------------------------------------------------------------------------------------------------------|-------|
| 1  | <input checked="" type="checkbox"/> |                     | 18b | Plans to promote participant retention and complete follow-up, including list of any outcome data to be collected for participants who discontinue or deviate from intervention protocols                                                                         | 12    |
| 2  |                                     |                     |     |                                                                                                                                                                                                                                                                   |       |
| 3  | <input checked="" type="checkbox"/> | Data management     | 19  | Plans for data entry, coding, security, and storage, including any related processes to promote data quality (eg, double data entry; range checks for data values). Reference to where details of data management procedures can be found, if not in the protocol | 12    |
| 4  |                                     |                     |     |                                                                                                                                                                                                                                                                   |       |
| 5  | <input checked="" type="checkbox"/> | Statistical methods | 20a | Statistical methods for analysing primary and secondary outcomes. Reference to where other details of the statistical analysis plan can be found, if not in the protocol                                                                                          | 12,13 |
| 6  |                                     |                     |     |                                                                                                                                                                                                                                                                   |       |
| 7  | <input checked="" type="checkbox"/> |                     | 20b | Methods for any additional analyses (eg, subgroup and adjusted analyses)                                                                                                                                                                                          | 12,13 |
| 8  |                                     |                     |     |                                                                                                                                                                                                                                                                   |       |
| 9  | <input checked="" type="checkbox"/> |                     | 20c | Definition of analysis population relating to protocol non-adherence (eg, as randomised analysis), and any statistical methods to handle missing data (eg, multiple imputation)                                                                                   | 12,13 |
| 10 |                                     |                     |     |                                                                                                                                                                                                                                                                   |       |
| 11 |                                     |                     |     |                                                                                                                                                                                                                                                                   |       |
| 12 |                                     |                     |     |                                                                                                                                                                                                                                                                   |       |
| 13 |                                     |                     |     |                                                                                                                                                                                                                                                                   |       |
| 14 |                                     |                     |     |                                                                                                                                                                                                                                                                   |       |
| 15 |                                     |                     |     |                                                                                                                                                                                                                                                                   |       |
| 16 |                                     |                     |     |                                                                                                                                                                                                                                                                   |       |
| 17 |                                     |                     |     |                                                                                                                                                                                                                                                                   |       |
| 18 |                                     |                     |     |                                                                                                                                                                                                                                                                   |       |
| 19 |                                     |                     |     |                                                                                                                                                                                                                                                                   |       |
| 20 |                                     |                     |     |                                                                                                                                                                                                                                                                   |       |
| 21 |                                     |                     |     |                                                                                                                                                                                                                                                                   |       |
| 22 |                                     |                     |     |                                                                                                                                                                                                                                                                   |       |
| 23 |                                     |                     |     |                                                                                                                                                                                                                                                                   |       |
| 24 |                                     |                     |     |                                                                                                                                                                                                                                                                   |       |
| 25 |                                     |                     |     |                                                                                                                                                                                                                                                                   |       |
| 26 |                                     |                     |     |                                                                                                                                                                                                                                                                   |       |
| 27 |                                     |                     |     |                                                                                                                                                                                                                                                                   |       |
| 28 |                                     |                     |     |                                                                                                                                                                                                                                                                   |       |
| 29 |                                     |                     |     |                                                                                                                                                                                                                                                                   |       |

|    |                                     |                 |     |                                                                                                                                                                                                                                                                                                                                       |        |
|----|-------------------------------------|-----------------|-----|---------------------------------------------------------------------------------------------------------------------------------------------------------------------------------------------------------------------------------------------------------------------------------------------------------------------------------------|--------|
| 30 | <b>Methods: Monitoring</b>          |                 |     |                                                                                                                                                                                                                                                                                                                                       |        |
| 31 |                                     |                 |     |                                                                                                                                                                                                                                                                                                                                       |        |
| 32 | <input checked="" type="checkbox"/> | Data monitoring | 21a | Composition of data monitoring committee (DMC); summary of its role and reporting structure; statement of whether it is independent from the sponsor and competing interests; and reference to where further details about its charter can be found, if not in the protocol. Alternatively, an explanation of why a DMC is not needed | 14     |
| 33 |                                     |                 |     |                                                                                                                                                                                                                                                                                                                                       |        |
| 34 | <input checked="" type="checkbox"/> |                 | 21b | Description of any interim analyses and stopping guidelines, including who will have access to these interim results and make the final decision to terminate the trial                                                                                                                                                               | 12, 13 |
| 35 |                                     |                 |     |                                                                                                                                                                                                                                                                                                                                       |        |
| 36 | <input checked="" type="checkbox"/> | Harms           | 22  | Plans for collecting, assessing, reporting, and managing solicited and spontaneously reported adverse events and other unintended effects of trial interventions or trial conduct                                                                                                                                                     | 11     |
| 37 |                                     |                 |     |                                                                                                                                                                                                                                                                                                                                       |        |
| 38 | <input checked="" type="checkbox"/> | Auditing        | 23  | Frequency and procedures for auditing trial conduct, if any, and whether the process will be independent from investigators and the sponsor                                                                                                                                                                                           | 14     |
| 39 |                                     |                 |     |                                                                                                                                                                                                                                                                                                                                       |        |
| 40 |                                     |                 |     |                                                                                                                                                                                                                                                                                                                                       |        |
| 41 |                                     |                 |     |                                                                                                                                                                                                                                                                                                                                       |        |
| 42 |                                     |                 |     |                                                                                                                                                                                                                                                                                                                                       |        |
| 43 |                                     |                 |     |                                                                                                                                                                                                                                                                                                                                       |        |
| 44 |                                     |                 |     |                                                                                                                                                                                                                                                                                                                                       |        |
| 45 |                                     |                 |     |                                                                                                                                                                                                                                                                                                                                       |        |
| 46 |                                     |                 |     |                                                                                                                                                                                                                                                                                                                                       |        |
| 47 |                                     |                 |     |                                                                                                                                                                                                                                                                                                                                       |        |
| 48 |                                     |                 |     |                                                                                                                                                                                                                                                                                                                                       |        |
| 49 |                                     |                 |     |                                                                                                                                                                                                                                                                                                                                       |        |
| 50 |                                     |                 |     |                                                                                                                                                                                                                                                                                                                                       |        |
| 51 |                                     |                 |     |                                                                                                                                                                                                                                                                                                                                       |        |
| 52 |                                     |                 |     |                                                                                                                                                                                                                                                                                                                                       |        |
| 53 |                                     |                 |     |                                                                                                                                                                                                                                                                                                                                       |        |
| 54 |                                     |                 |     |                                                                                                                                                                                                                                                                                                                                       |        |
| 55 |                                     |                 |     |                                                                                                                                                                                                                                                                                                                                       |        |
| 56 |                                     |                 |     |                                                                                                                                                                                                                                                                                                                                       |        |
| 57 |                                     |                 |     |                                                                                                                                                                                                                                                                                                                                       |        |
| 58 |                                     |                 |     |                                                                                                                                                                                                                                                                                                                                       |        |
| 59 |                                     |                 |     |                                                                                                                                                                                                                                                                                                                                       |        |
| 60 |                                     |                 |     |                                                                                                                                                                                                                                                                                                                                       |        |

|                                 |  |
|---------------------------------|--|
| <b>Ethics and dissemination</b> |  |
|---------------------------------|--|

|    |                                     |                               |     |                                                                                                                                                                                                                                                                                     |       |
|----|-------------------------------------|-------------------------------|-----|-------------------------------------------------------------------------------------------------------------------------------------------------------------------------------------------------------------------------------------------------------------------------------------|-------|
| 1  | <input checked="" type="checkbox"/> | Research ethics approval      | 24  | Plans for seeking research ethics committee/institutional review board (REC/IRB) approval                                                                                                                                                                                           | 15    |
| 2  |                                     |                               |     |                                                                                                                                                                                                                                                                                     |       |
| 3  |                                     |                               |     |                                                                                                                                                                                                                                                                                     |       |
| 4  |                                     |                               |     |                                                                                                                                                                                                                                                                                     |       |
| 5  | <input checked="" type="checkbox"/> | Protocol amendments           | 25  | Plans for communicating important protocol modifications (eg, changes to eligibility criteria, outcomes, analyses) to relevant parties (eg, investigators, REC/IRBs, trial participants, trial registries, journals, regulators)                                                    | 15    |
| 6  |                                     |                               |     |                                                                                                                                                                                                                                                                                     |       |
| 7  |                                     |                               |     |                                                                                                                                                                                                                                                                                     |       |
| 8  |                                     |                               |     |                                                                                                                                                                                                                                                                                     |       |
| 9  |                                     |                               |     |                                                                                                                                                                                                                                                                                     |       |
| 10 |                                     |                               |     |                                                                                                                                                                                                                                                                                     |       |
| 11 |                                     |                               |     |                                                                                                                                                                                                                                                                                     |       |
| 12 |                                     |                               |     |                                                                                                                                                                                                                                                                                     |       |
| 13 | <input checked="" type="checkbox"/> | Consent or assent             | 26a | Who will obtain informed consent or assent from potential trial participants or authorised surrogates, and how (see Item 32)                                                                                                                                                        | 10    |
| 14 |                                     |                               |     |                                                                                                                                                                                                                                                                                     |       |
| 15 |                                     |                               |     |                                                                                                                                                                                                                                                                                     |       |
| 16 |                                     |                               |     |                                                                                                                                                                                                                                                                                     |       |
| 17 | <input checked="" type="checkbox"/> |                               | 26b | Additional consent provisions for collection and use of participant data and biological specimens in ancillary studies, if applicable                                                                                                                                               | 9     |
| 18 |                                     |                               |     |                                                                                                                                                                                                                                                                                     |       |
| 19 |                                     |                               |     |                                                                                                                                                                                                                                                                                     |       |
| 20 |                                     |                               |     |                                                                                                                                                                                                                                                                                     |       |
| 21 |                                     |                               |     |                                                                                                                                                                                                                                                                                     |       |
| 22 | <input checked="" type="checkbox"/> | Confidentiality               | 27  | How personal information about potential and enrolled participants will be collected, shared, and maintained in order to protect confidentiality before, during, and after the trial                                                                                                | 15    |
| 23 |                                     |                               |     |                                                                                                                                                                                                                                                                                     |       |
| 24 |                                     |                               |     |                                                                                                                                                                                                                                                                                     |       |
| 25 |                                     |                               |     |                                                                                                                                                                                                                                                                                     |       |
| 26 |                                     |                               |     |                                                                                                                                                                                                                                                                                     |       |
| 27 |                                     |                               |     |                                                                                                                                                                                                                                                                                     |       |
| 28 | <input checked="" type="checkbox"/> | Declaration of interests      | 28  | Financial and other competing interests for principal investigators for the overall trial and each study site                                                                                                                                                                       | 14    |
| 29 |                                     |                               |     |                                                                                                                                                                                                                                                                                     |       |
| 30 |                                     |                               |     |                                                                                                                                                                                                                                                                                     |       |
| 31 |                                     |                               |     |                                                                                                                                                                                                                                                                                     |       |
| 32 |                                     |                               |     |                                                                                                                                                                                                                                                                                     |       |
| 33 | <input checked="" type="checkbox"/> | Access to data                | 29  | Statement of who will have access to the final trial dataset, and disclosure of contractual agreements that limit such access for investigators                                                                                                                                     | 14    |
| 34 |                                     |                               |     |                                                                                                                                                                                                                                                                                     |       |
| 35 |                                     |                               |     |                                                                                                                                                                                                                                                                                     |       |
| 36 |                                     |                               |     |                                                                                                                                                                                                                                                                                     |       |
| 37 |                                     |                               |     |                                                                                                                                                                                                                                                                                     |       |
| 38 | <input checked="" type="checkbox"/> | Ancillary and post-trial care | 30  | Provisions, if any, for ancillary and post-trial care, and for compensation to those who suffer harm from trial participation                                                                                                                                                       | 15    |
| 39 |                                     |                               |     |                                                                                                                                                                                                                                                                                     |       |
| 40 |                                     |                               |     |                                                                                                                                                                                                                                                                                     |       |
| 41 |                                     |                               |     |                                                                                                                                                                                                                                                                                     |       |
| 42 |                                     |                               |     |                                                                                                                                                                                                                                                                                     |       |
| 43 | <input checked="" type="checkbox"/> | Dissemination policy          | 31a | Plans for investigators and sponsor to communicate trial results to participants, healthcare professionals, the public, and other relevant groups (eg, via publication, reporting in results databases, or other data sharing arrangements), including any publication restrictions | 2,14  |
| 44 |                                     |                               |     |                                                                                                                                                                                                                                                                                     |       |
| 45 |                                     |                               |     |                                                                                                                                                                                                                                                                                     |       |
| 46 |                                     |                               |     |                                                                                                                                                                                                                                                                                     |       |
| 47 |                                     |                               |     |                                                                                                                                                                                                                                                                                     |       |
| 48 |                                     |                               |     |                                                                                                                                                                                                                                                                                     |       |
| 49 |                                     |                               |     |                                                                                                                                                                                                                                                                                     |       |
| 50 |                                     |                               |     |                                                                                                                                                                                                                                                                                     |       |
| 51 | <input checked="" type="checkbox"/> |                               | 31b | Authorship eligibility guidelines and any intended use of professional writers                                                                                                                                                                                                      | 16    |
| 52 |                                     |                               |     |                                                                                                                                                                                                                                                                                     |       |
| 53 |                                     |                               |     |                                                                                                                                                                                                                                                                                     |       |
| 54 | <input checked="" type="checkbox"/> |                               | 31c | Plans, if any, for granting public access to the full protocol, participant- level dataset, and statistical code                                                                                                                                                                    | 2, 14 |
| 55 |                                     |                               |     |                                                                                                                                                                                                                                                                                     |       |
| 56 |                                     |                               |     |                                                                                                                                                                                                                                                                                     |       |
| 57 |                                     |                               |     |                                                                                                                                                                                                                                                                                     |       |
| 58 |                                     |                               |     |                                                                                                                                                                                                                                                                                     |       |
| 59 | <b>Appendices</b>                   |                               |     |                                                                                                                                                                                                                                                                                     |       |
| 60 |                                     |                               |     |                                                                                                                                                                                                                                                                                     |       |

|   |                                     |                            |    |                                                                                                                                                                                                |      |
|---|-------------------------------------|----------------------------|----|------------------------------------------------------------------------------------------------------------------------------------------------------------------------------------------------|------|
| 1 | <input checked="" type="checkbox"/> | Informed consent materials | 32 | Model consent form and other related documentation given to participants and authorised surrogates                                                                                             | *    |
| 2 |                                     |                            |    |                                                                                                                                                                                                |      |
| 3 |                                     |                            |    |                                                                                                                                                                                                |      |
| 4 |                                     |                            |    |                                                                                                                                                                                                |      |
| 5 | <input checked="" type="checkbox"/> | Biological specimens       | 33 | Plans for collection, laboratory evaluation, and storage of biological specimens for genetic or molecular analysis in the current trial and for future use in ancillary studies, if applicable | 9, * |
| 6 |                                     |                            |    |                                                                                                                                                                                                |      |
| 7 |                                     |                            |    |                                                                                                                                                                                                |      |
| 8 |                                     |                            |    |                                                                                                                                                                                                |      |
| 9 |                                     |                            |    |                                                                                                                                                                                                |      |

## COMMENTS:

\* Some parts of the documentation will be attached to the submission, such as the model consent form and other related documentation.

For peer review only

# BMJ Open

## RANDOMISED MULTICENTRE CLINICAL TRIAL TO EVALUATE VORICONAZOLE PRE-EMPTIVE GENOTYPING STRATEGY IN PATIENTS WITH RISK OF ASPERGILLOSIS: VORIGENIPHARM STUDY PROTOCOL

|                                 |                                                                                                                                                                                                                                                                                                                                                                                                                                                                                                                                                                                                                                                                                                                                                                                                                                                                                                                                                                                                                                                                                                                                                                                                                                                                                                                                                                                                                                                                                                                                             |
|---------------------------------|---------------------------------------------------------------------------------------------------------------------------------------------------------------------------------------------------------------------------------------------------------------------------------------------------------------------------------------------------------------------------------------------------------------------------------------------------------------------------------------------------------------------------------------------------------------------------------------------------------------------------------------------------------------------------------------------------------------------------------------------------------------------------------------------------------------------------------------------------------------------------------------------------------------------------------------------------------------------------------------------------------------------------------------------------------------------------------------------------------------------------------------------------------------------------------------------------------------------------------------------------------------------------------------------------------------------------------------------------------------------------------------------------------------------------------------------------------------------------------------------------------------------------------------------|
| Journal:                        | <i>BMJ Open</i>                                                                                                                                                                                                                                                                                                                                                                                                                                                                                                                                                                                                                                                                                                                                                                                                                                                                                                                                                                                                                                                                                                                                                                                                                                                                                                                                                                                                                                                                                                                             |
| Manuscript ID                   | bmjopen-2020-037443.R2                                                                                                                                                                                                                                                                                                                                                                                                                                                                                                                                                                                                                                                                                                                                                                                                                                                                                                                                                                                                                                                                                                                                                                                                                                                                                                                                                                                                                                                                                                                      |
| Article Type:                   | Protocol                                                                                                                                                                                                                                                                                                                                                                                                                                                                                                                                                                                                                                                                                                                                                                                                                                                                                                                                                                                                                                                                                                                                                                                                                                                                                                                                                                                                                                                                                                                                    |
| Date Submitted by the Author:   | 03-Aug-2020                                                                                                                                                                                                                                                                                                                                                                                                                                                                                                                                                                                                                                                                                                                                                                                                                                                                                                                                                                                                                                                                                                                                                                                                                                                                                                                                                                                                                                                                                                                                 |
| Complete List of Authors:       | <p>Monserrat Villatoro, Jaime; Hospital Universitario La Paz, Clinical Pharmacology Department</p> <p>García García, Irene; Hospital Universitario La Paz, Clinical Pharmacology Department</p> <p>Bueno, David; Hospital Universitario La Paz, Pediatric Oncology and Haematology Department</p> <p>de la Cámara, Rafael; Hospital Universitario de la Princesa, Haematology Department</p> <p>Estébanez, Miriam; Hospital Central de la Defensa Gómez Ulla, Internal Medicine Department</p> <p>López de la Guía, Ana; Hospital Universitario La Paz, Haematology Department</p> <p>Abad-Santos, Francisco; Hospital Universitario de la Princesa</p> <p>Antón, Cristina; Universidad Francisco de Vitoria, Health Technology Assessment Department</p> <p>Mejía, Gina; Hospital Universitario de la Princesa, Clinical Pharmacology</p> <p>Otero, María José; Hospital Central de la Defensa Gómez Ulla, Haematology Department</p> <p>Ramírez García, Elena; Hospital Universitario La Paz, Clinical Pharmacology Department; Universidad Autonoma de Madrid, Pharmacology Department</p> <p>Frías Iniesta, Jesús; Hospital Universitario La Paz, Clinical Pharmacology Department; Universidad Autonoma de Madrid, Pharmacology Department</p> <p>Carcas, Antonio; Hospital Universitario La Paz, Clinical Pharmacology; Universidad Autonoma de Madrid, Pharmacology Department</p> <p>Borobia, Alberto; Hospital Universitario La Paz, Clinical Pharmacology Department; Universidad Autonoma de Madrid, Pharmacology Department</p> |
| <b>Primary Subject Heading</b>: | Genetics and genomics                                                                                                                                                                                                                                                                                                                                                                                                                                                                                                                                                                                                                                                                                                                                                                                                                                                                                                                                                                                                                                                                                                                                                                                                                                                                                                                                                                                                                                                                                                                       |
| Secondary Subject Heading:      | Infectious diseases                                                                                                                                                                                                                                                                                                                                                                                                                                                                                                                                                                                                                                                                                                                                                                                                                                                                                                                                                                                                                                                                                                                                                                                                                                                                                                                                                                                                                                                                                                                         |
| Keywords:                       | CLINICAL PHARMACOLOGY, INFECTIOUS DISEASES, Clinical trials < THERAPEUTICS                                                                                                                                                                                                                                                                                                                                                                                                                                                                                                                                                                                                                                                                                                                                                                                                                                                                                                                                                                                                                                                                                                                                                                                                                                                                                                                                                                                                                                                                  |

1  
2  
3  
4  
5  
6  
7  
8  
9  
10  
11  
12  
13  
14  
15  
16  
17  
18  
19  
20  
21  
22  
23  
24  
25  
26  
27  
28  
29  
30  
31  
32  
33  
34  
35  
36  
37  
38  
39  
40  
41  
42  
43  
44  
45  
46  
47  
48  
49  
50  
51  
52  
53  
54  
55  
56  
57  
58  
59  
60



SCHOLARONE™  
Manuscripts



I, the Submitting Author has the right to grant and does grant on behalf of all authors of the Work (as defined in the below author licence), an exclusive licence and/or a non-exclusive licence for contributions from authors who are: i) UK Crown employees; ii) where BMJ has agreed a CC-BY licence shall apply, and/or iii) in accordance with the terms applicable for US Federal Government officers or employees acting as part of their official duties; on a worldwide, perpetual, irrevocable, royalty-free basis to BMJ Publishing Group Ltd ("BMJ") its licensees and where the relevant Journal is co-owned by BMJ to the co-owners of the Journal, to publish the Work in this journal and any other BMJ products and to exploit all rights, as set out in our [licence](#).

The Submitting Author accepts and understands that any supply made under these terms is made by BMJ to the Submitting Author unless you are acting as an employee on behalf of your employer or a postgraduate student of an affiliated institution which is paying any applicable article publishing charge ("APC") for Open Access articles. Where the Submitting Author wishes to make the Work available on an Open Access basis (and intends to pay the relevant APC), the terms of reuse of such Open Access shall be governed by a Creative Commons licence – details of these licences and which [Creative Commons](#) licence will apply to this Work are set out in our licence referred to above.

Other than as permitted in any relevant BMJ Author's Self Archiving Policies, I confirm this Work has not been accepted for publication elsewhere, is not being considered for publication elsewhere and does not duplicate material already published. I confirm all authors consent to publication of this Work and authorise the granting of this licence.



**TITLE: RANDOMISED MULTICENTRE CLINICAL TRIAL TO EVALUATE VORICONAZOLE PRE-EMPTIVE GENOTYPING STRATEGY IN PATIENTS WITH RISK OF ASPERGILLOSIS: VORIGENIPHARM STUDY PROTOCOL**

| <b>Data category</b>                             | <b>Information</b>                                                                                                                                                                                                                                                                                                                       |
|--------------------------------------------------|------------------------------------------------------------------------------------------------------------------------------------------------------------------------------------------------------------------------------------------------------------------------------------------------------------------------------------------|
| Primary registry and trial identification number | EU Clinical Trials Register<br><a href="https://www.clinicaltrialsregister.eu/ctr-search/search">https://www.clinicaltrialsregister.eu/ctr-search/search</a><br>2019-000376-41<br><br>ClinicalTrials.Gov<br><a href="https://clinicaltrials.gov/ct2/show/NCT04238884">https://clinicaltrials.gov/ct2/show/NCT04238884</a><br>NCT04238884 |
| Date of registration in primary registry         | 18 June 2019                                                                                                                                                                                                                                                                                                                             |
| Source(s) of monetary or material support        | Institute of Health Carlos III, grants for Health Research Project 2018 of Spain                                                                                                                                                                                                                                                         |
| Primary sponsor                                  | La Paz University Hospital Research Foundation (FIBHULP)                                                                                                                                                                                                                                                                                 |
| Contact for public queries                       | Alberto M. Borobia Perez, MD, PhD, La Paz University Hospital, Clinical Pharmacology Department, +34917277558, <a href="mailto:alberto.borobia@salud.madrid.org">alberto.borobia@salud.madrid.org</a>                                                                                                                                    |
| Contact for scientific queries                   | Alberto M. Borobia Perez, MD, PhD, La Paz University Hospital, Clinical Pharmacology Department, +34917277558, <a href="mailto:alberto.borobia@salud.madrid.org">alberto.borobia@salud.madrid.org</a>                                                                                                                                    |
| Public title                                     | Clinical trial to evaluate the effectiveness and efficiency of pre-emptive genotyping before treatment with voriconazole                                                                                                                                                                                                                 |
| Scientific title                                 | Randomised multicentre clinical trial to evaluate voriconazole pre-emptive genotyping strategy in patients with risk of aspergillosis: vorigenipharm study protocol                                                                                                                                                                      |
| Countries of recruitment                         | Spain                                                                                                                                                                                                                                                                                                                                    |
| Health condition(s) or problem(s) studied        | Fungal infectious disorders, neutropaenia, chemotherapy-induced neutropaenia, haematopoietic neoplasm, allogeneic peripheral haematopoietic stem cell transplant, autologous peripheral haematopoietic stem cell transplant                                                                                                              |
| Intervention(s)                                  | Pre-emptive genotyping plus post-serum levels vs sole post-serum level adjustment of voriconazole                                                                                                                                                                                                                                        |

|                                      |                                                                                                                                                                                                                                                                                                                                                                                                                                                                                                                                                     |
|--------------------------------------|-----------------------------------------------------------------------------------------------------------------------------------------------------------------------------------------------------------------------------------------------------------------------------------------------------------------------------------------------------------------------------------------------------------------------------------------------------------------------------------------------------------------------------------------------------|
| Key inclusion and exclusion criteria | Ages eligible for study: no limit<br>Sexes eligible for study: both<br>Accepts healthy volunteers: no<br>Inclusion criteria: children who are going to receive an HSCT and those who have diagnosis of acute myeloid leukaemia as well as its relapse. Adults diagnosed with acute leukaemia, with expected prolonged neutropaenia, and those with risk of developing a fungal infection.<br>Exclusion criteria: patients who for any reason should not be included in the study according to the criteria of the research team.                    |
| Study type                           | Interventional<br>Allocation: randomised<br>Intervention model: parallel assignment<br>Masking: single-blind (subject)<br>Primary purpose: prevention<br>Phase IV                                                                                                                                                                                                                                                                                                                                                                                   |
| Date of first enrolment              | January 2020                                                                                                                                                                                                                                                                                                                                                                                                                                                                                                                                        |
| Target sample size                   | 146                                                                                                                                                                                                                                                                                                                                                                                                                                                                                                                                                 |
| Recruitment status                   | Not started                                                                                                                                                                                                                                                                                                                                                                                                                                                                                                                                         |
| Primary outcome(s)                   | Serum voriconazole concentration within the therapeutic range.                                                                                                                                                                                                                                                                                                                                                                                                                                                                                      |
| Key secondary outcomes               | Therapeutic failure and adverse events. Dose-related adverse events associated with treatment                                                                                                                                                                                                                                                                                                                                                                                                                                                       |
| Ethics Review                        | Status: Approved.<br>Date of approval: June 6th 2019 and June 18th 2019.<br>Name and contact details of Ethics committee(s): approved by 'La Paz' University Hospital Ethics Committee and the Spanish Drugs and Health Products Agency, respectively.                                                                                                                                                                                                                                                                                              |
| IPD sharing statement                | Plan to share IPD (Yes, No): Yes.<br>Plan description:<br>A copy of the database of data collected during the clinical trial will be attached as an appendix to the publication resulting from this clinical trial.<br>This data will be available at the same time as the results will be published, and will be kept available to everyone without any time limit. Data will be available indefinitely on the publisher's website, as long as it is kept by the Publisher, for anyone who wishes to access the data, for non-commercial purposes. |

**AUTHORS**

Jaime Monserrat-Villatoro, MD †  
Clinical Pharmacology Department  
La Paz University Hospital, IdiPAZ

Irene Garcia, MD †  
Clinical Pharmacology Department  
La Paz University Hospital, IdiPAZ

David Bueno, MD, PhD  
Paediatric Onco-Haematology Department  
La Paz University Hospital, IdiPAZ

Rafael de la Camara, MD, PD  
Haematology Department  
La Princesa University Hospital

Miriam Estébanez, MD, PhD  
Infectious Diseases, Internal Medicine Department  
Gómez Ulla Hospital  
University of Alcalá de Henares

Ana Lopez, MD, PhD  
Haematology Department  
La Paz University Hospital

Francisco Abad Santos, MD, PhD  
Clinical Pharmacology Department  
La Princesa University Hospital  
Autonomous University of Madrid

Cristina Antón, MD, PhD  
Health Technologies Assessment Department  
Francisco de Vitoria University

Gina Mejia, MD, PhD  
Clinical Pharmacology Department  
La Princesa University Hospital

María José Otero, MD, PhD  
Haematology Department  
Gómez Ulla Hospital

Elena Ramírez, MD, PhD  
Clinical Pharmacology Department  
La Paz University Hospital. IdiPAZ  
Autonomous University of Madrid

Jesús Frías Iniesta, MD, PhD  
Clinical Pharmacology Department  
La Paz University Hospital, IdiPAZ  
Autonomous University of Madrid

1  
2 Antonio J. Carcas, MD, PhD \*  
3 Clinical Pharmacology Department  
4 La Paz University Hospital, IdiPAZ  
5 Autonomous University of Madrid  
6

7 Alberto M. Borobia, MD, PhD \*  
8 Clinical Pharmacology Department  
9 La Paz University Hospital, IdiPAZ  
10 Autonomous University of Madrid  
11 Spanish Clinical Research Network (SCReN)  
12

13 † Equal contribution

14 \* Corresponding authors  
15  
16  
17  
18

### 19 **Corresponding author**

20  
21 Alberto M. Borobia, Antonio J. Carcas  
22 Clinical Pharmacology Department  
23 La Paz University Hospital  
24 Paseo de la Castellana, 261  
25 28046-Madrid  
26 Telephone and FAX: +34-912071466  
27 Mail: [alberto.borobia@salud.madrid.org](mailto:alberto.borobia@salud.madrid.org); [antonio.carcas@uam.es](mailto:antonio.carcas@uam.es)  
28  
29  
30

### 31 **WORD COUNTS**

32 Main text: 4042 words

33 Abstract: 297 words  
34  
35  
36  
37  
38  
39  
40  
41  
42  
43  
44  
45  
46  
47  
48  
49  
50  
51  
52  
53  
54  
55  
56  
57  
58  
59  
60

## ABSTRACT

**Introduction:** Invasive aspergillosis is the most important cause of morbidity and mortality in patients with haematological diseases. At present, voriconazole is the first-line treatment for invasive fungal disease. The pharmacokinetic interindividual variability of voriconazole depends on genetic factors. CYP450 is involved in 70%–75% of total metabolism of voriconazole, mainly CYP3A4 and CYP2C19, with the remaining 25%–30% of metabolism conducted by monooxygenase flavins. CYP2C19 single nucleotide polymorphisms could explain 50%–55% of variability in voriconazole metabolism.

**Materials and Methods:** The main objective is to compare efficiency of pre-emptive voriconazole genotyping with routine practice. The primary outcome is serum voriconazole on the fifth day within the therapeutic range. The secondary outcome is the combined variables of therapeutic failure and adverse events within 90 days of first administration, associated with voriconazole. A total of 146 patients at risk of invasive aspergillosis who will potentially receive voriconazole will be recruited, and CYP2C19 will be genotyped. If the patient ultimately receives voriconazole, they will be randomised (1:1 experimental/control). In the experimental arm, patients will receive a dose according to a pharmacogenetic algorithm, including CYP2C19 genotype and clinical and demographic information. In the control arm, patients will receive a dose according to clinical practice guidelines. In addition, a Spanish National Healthcare System (NHS) point-of-view cost-effectiveness evaluation will be performed. Direct cost calculations for each arm will be performed.

**Conclusion:** This trial will provide information about the viability and cost-effectiveness of the implementation of a pre-emptive voriconazole genotyping strategy in the Spanish NHS.

**Ethics and dissemination:** A Spanish version of this protocol has been evaluated and approved by the La Paz University Hospital Ethics Committee and the Spanish Agency of Medicines and Medical Devices. Trial results will be submitted for publication in an open peer-reviewed medical speciality-specific publication. Eudra-CT: 2019-000376-41. ClinicalTrials: NCT04238884

## STRENGTHS AND LIMITATIONS OF THIS STUDY

- (1) The study will be randomised, with objective variables and not influenced by placebo effect (voriconazole serum level).
- (2) The effectiveness and safety related to serum voriconazole is well known.
- (3) For patients in this study, there is little risk compared with routine clinical practice.
- (4) The study is single-blinded.
- (5) Our results depend on the frequency of CYP2C19 polymorphism.

## INTRODUCTION:

Invasive aspergillosis is the most important cause of morbidity and mortality in patients with haematological diseases. The most recent epidemiologic studies show an incidence of probable or proven invasive aspergillosis in patients with high-risk haematological diseases of 6%–11% [1][2]. Mortality due to this complication in patients with acute leukaemia is 27% [1], and up to 40% if we include every malignant haematologic disease [3]. In recent years, great advances in the treatment of this pathology have been made, which have improved the prognosis of haematologic diseases. However, high morbidity and mortality associated with infectious complications continue to be a medical problem. As a result, improving the prognosis for invasive fungal disease has great scientific interest, with aspergillosis being the most prevalent form.

At present, voriconazole is the first-line treatment for invasive fungal disease (1-grade evidence, A-grade recommendation) [4][5]. It is a third-generation triazole antifungal with broad-spectrum activity. Achieving voriconazole serum levels in the therapeutic range during the first treatment week improves the prognosis of fungal infection and the tolerability of the treatment by reducing dose-dependent adverse effects (AEs) [6]. The AE reduction, associated with posology optimization, decreases the amount of withdrawals of this antifungal drug.

Genetic variations could become markers that help us predict the pharmacological response depending on whether they are present and on their interrelationship with other markers associated with clinical response. In recent years, several groups and organisations have published evidence assessment systems, guidelines, systematic reviews and evaluations for various drugs and pathologies; in some cases, genotyping prior to treatment with various drugs has been shown to be cost-efficient [7].

Focusing on voriconazole, its pharmacokinetic interindividual variability depends on genetic factors [8]. CYP450 is involved in 70%–75% of the total metabolism of voriconazole, mainly CYP3A4 and CYP2C19, with the remaining 25%–30% of metabolism conducted by monooxygenase flavins. CYP2C19 single nucleotide polymorphisms could explain 50%–55% of variability in voriconazole metabolism. Some 5%–17% of patients are ultrafast metabolisers (CYP2C19\*17/\*17), and approximately 25%–33% of patients are fast metabolisers (CYP2C19\*1/\*17). Both are associated with a high risk of not achieving therapeutic levels for invasive aspergillosis [9][10]. Pharmacogenetics information oriented to dose adjustment is present in European dosing guidelines and in FDA recommendations, in which recommendations are given according to genotype [8]. This information must be known by every physician in order to reduce adverse effects, improve effectiveness and thus raise patient compliance by reducing morbidity and mortality.

1  
2 We propose a pragmatic clinical trial to evaluate the effectiveness and efficiency of a pre-emptive  
3 genotyping strategy of biomarkers related to the voriconazole response in patients with  
4 haematological disease who are at risk of suffering an infection susceptible to treatment with  
5 voriconazole.  
6  
7

## 8 9 **METHODS AND ANALYSIS**

### 10 11 **Study design**

12  
13  
14 VORIGENIPHARM is an acronym (VORIconazole PHARMacoGENetics) of the clinical trial with  
15 code EUDRA-CT: 2019-000376-41, funded by the Spanish Health Research and Development  
16 Strategy. It is a phase IV pragmatic, multicentre, randomised, single-blind, parallel arm, centre-  
17 stratified clinical trial. A total of 146 patients at risk of invasive aspergillosis who will potentially  
18 receive voriconazole will be recruited, and CYP2C19 alleles will be genotyped. The patients who  
19 ultimately receive voriconazole will be randomised to receive the dose according to a  
20 pharmacogenetic algorithm, including the CYP2C19 genotype and clinical and demographic  
21 information, or according to clinical practice (Figure 1).  
22  
23  
24  
25  
26  
27  
28  
29  
30

### 31 **Study objectives**

#### 32 General objective:

33  
34  
35  
36  
37 Evaluating the effectiveness and efficiency of a pre-emptive genotyping strategy for voriconazole in  
38 treatment and prophylaxis of *Aspergillus* fungal infections in patients with haematological diseases.  
39

#### 40 Primary objective:

- 41  
42  
43  
44  
45  
46  
47  
48  
49
- Evaluate the effectiveness of a pre-emptive genotyping strategy for voriconazole in achieving adequate therapeutic levels in haematological patients at risk of fungal infection compared with routine clinical practice.

#### 50 Secondary objectives:

- 51  
52  
53  
54  
55  
56  
57  
58  
59  
60
- Evaluate the safety of pre-emptive genotyping of voriconazole in haematological patients at risk of fungal infection, comparing it with routine clinical practice.
  - Evaluate the efficiency of this pre-emptive genotyping strategy. By mean of a cost-effectiveness analysis. Cost includes the mean total direct cost per patient, also including the cost of adverse events. The effectiveness will be measured as a combined variable of therapeutic failure described in the outcomes section.

## Eligibility

The patient will be selected from La Paz University Hospital Paediatrics Hemato-Oncology Department, La Paz University Hospital Haematology Department, La Princesa University Hospital Adult Hematology Department and Gomez-Ulla University Hospital Adult Hematology Department. They will include children and adults who meet the following inclusion criteria:

- 1) Risk of developing invasive aspergillosis who are potentially eligible for treatment or prophylaxis with voriconazole:
  - a. Paediatric population: children undergoing haematopoietic stem cell transplantation, with acute myeloid leukaemia, as well as their relapses.
  - b. Adult population: patients diagnosed with acute leukaemia and those with long-term expected neutropaenia secondary to haematological disease and/or undergoing specific treatment (e.g., aplastic anaemia and variants, myelodysplastic syndrome, solid organ or bone marrow transplantation), and patients who the clinician in charge considers might be at risk of developing fungal infection.
- 2) Accepting participation in the study by signing the informed consent (adult patients), or minor patients whose representative/legal guardian has willingly signed the informed consent. In the case of mature minors (12–17 years of age), in addition to the consent signed by the legal guardian, the minor's assent shall be obtained.

The exclusion criteria are as follows:

- 1) Patients who for any reason should not be included in the study as assessed by the research team.
- 2) Patients who are not capable of understanding the information form and are unable to sign the informed consent document.

All patients eligible to receive voriconazole will sign an informed consent document for their participation in the clinical trial and for the collection of blood samples destined for genetic studies. They will also be asked for their consent to store an aliquot of their DNA for future studies (i.e., mass



sequencing). Patients identified in this phase will be randomised if and when they receive voriconazole.

## Randomisation

Patients who meet all inclusion and no exclusion criteria, who have signed the informed consent and will receive voriconazole will be randomised, stratified by centres. The randomisation sequence was created using SAS version 9.4 statistical software (procedure 'PROC PLAN') with a 1:1 allocation. No randomisation seed was specified. The randomisation seed was generated taking the hour of the computer where the program was executed. Randomization will be done centrally through the electronic CRF (MACRO®) in order to conceal the sequence until interventions are assigned.

## Masking

The study is single blind, and under no circumstance does the patient know the group to which they have been assigned. The medical researchers are unaware of the randomization scheme. Although there is a risk of unmasking the patient, and the lack of masking for the physician could affect the evaluation variables, we believe that in this clinical trial is permissible since the primary variable is an objective one (voriconazol concentration), and a total masking is not feasible in a study using a pragmatic approach.

## Outcomes

### Primary outcome

Serum voriconazole levels in the range of 1–5.5 µg/mL on the fifth day, according to the British Society for Medical Mycology, which is a subrogated variable strongly related to effectiveness and safety, with high-level evidence [11].

### Secondary outcomes

- A combined variable of therapeutic failure and AEs occurring within 90 days of first voriconazole administration.
  - Therapeutic failure is defined following EORTC consensus [12]:
    - Patients with probable or proven invasive aspergillosis: drug change or association because of poor clinical or radiological evolution of the disease.

- Patients who received prophylactic treatment: the necessity of change because of probable or proven invasive fungal disease.
  - Adverse event: Dose-dependent drug AEs, including visual disturbances (e.g., photopsia), skin reactions, neurotoxicity (e.g., confusion and visual hallucinations) and QTc lengthening, requiring voriconazole withdrawal.
- Costs by AE
  - Cost savings by AE
  - Quality-adjusted life years.

## Study procedures

The study visits and procedures will be performed as shown in Table 1.

- Selection visit: After confirming the selection criteria, informing the patient and signing the informed consent document, a blood sample will be taken for genetic analysis. Patients who have not received voriconazole within 3 months of recruitment will not be considered for randomisation, but will be considered for economic evaluation. Patients who, in this 3-month period, receive voriconazole will continue to the randomisation visit.
- Randomisation visit: The patient will be randomised to one of the two branches of the study:
  - Experimental group: based on the genetic study performed and the patient's characteristics (age, weight, indication), the Pharmacogenetics Unit of La Paz University Hospital will indicate the dose to be administered. The dose will be based on the therapeutic individualisation protocol guided by pharmacogenetics, as agreed by all clinical services, and which includes the recommendations of the Clinical Pharmacogenetics Implementation Consortium guide (Moriyana, 2016) and the study by Hicks et al (Hicks, 2014). In the experimental group arm, in cases of patients with rapid, ultrafast or slow metaboliser phenotypes, a determination of serum voriconazole concentrations at 48 hours (+/- 24 hours) may be considered, which will make a dose adjustment possible if required.
  - Control group: No information will be provided and the procedure will be performed according to normal clinical practice, with clinical monitoring by the doctor in charge. In both cases, the request for serum voriconazole levels for subsequent dose adjustment will be recommended, as is standard clinical practice, in accordance with the recommendations of the British Society for Medical Mycology (Ashbee, 2014).
- Primary outcome evaluation visit: Voriconazole concentrations will be measured on no later than the fifth day after the start of treatment ( $\pm 1$  day); if a dose adjustment is necessary, this

1  
2 will be performed according to the criteria of the attending clinician (control group) or the  
3 Pharmacogenetic Unit (experimental group); subsequent monitoring (determination of  
4 concentrations and dose adjustment) will be performed according to the criteria of the  
5 attending clinician in both arms.  
6  
7

- 8 • Follow-up visits: While the patient is being treated with voriconazole, follow-up visits will be  
9 made according to clinical criteria, and the following information will be recorded:
  - 10 ○ Evaluation of potential voriconazole-related clinical AEs (see evaluation variables).  
11 This will be performed by asking the patient questions, performing a physical  
12 examination, routine tests (including liver enzymes) and an electrocardiogram.
  - 13 ○ Voriconazole levels, if requested according to medical criteria.
  - 14 ○ The type of consultation will be recorded: outpatient appointment, urgent episode,  
15 admission, readmission or phone call.
- 16 • End-of-treatment visit: Performed on the last day the patient receives treatment with  
17 voriconazole, including the following procedures:
  - 18 ○ A reason for the end of treatment will be indicated (withdrawal due to toxicity or  
19 therapeutic failure, or after completion of treatment according to clinical criteria of  
20 efficacy)
  - 21 ○ Evaluation of potentially voriconazole-related clinical adverse events, as in follow-up  
22 visits.
  - 23 ○ If the patient continues voriconazole treatment beyond 3 months, the end of study  
24 visit will be made at that time.
- 25 • End-of-study visit: the end-of-study visit will coincide with the end-of-treatment visit, except  
26 for those patients who are still undergoing treatment after 3 months. A safety analysis,  
27 electrocardiogram, and assessment of adverse events will be performed. Patients who  
28 continue treatment beyond this visit will be followed according to routine clinical practice.  
29  
30  
31  
32  
33  
34  
35  
36  
37  
38  
39  
40  
41  
42

### 43 **Voriconazole genotyping and therapeutic drug monitoring**

44  
45 Genotyping will be performed at the Institute of Medical and Molecular Genetics at La Paz University  
46 Hospital using the self-designed SNP-array device (PharmArray v.2.), which makes genotyping of  
47 180 relevant mutations possible for predicting the response to drugs. Among these mutations are  
48 the most relevant variants of CYP2C19, a gene that is related to serum levels of voriconazole, with  
49 a level of evidence 1A of CPIC: CYP2C19\*2 (rs4244285), CYP2C19\*3 (rs4986893) and  
50 CYP2C19\*17 (rs12248560).  
51  
52  
53  
54  
55  
56  
57  
58  
59  
60

1  
2 Serum voriconazole determinations will be tested at the Therapeutic Drug Monitoring Laboratory of  
3 the Clinical Pharmacology Service at La Paz University Hospital using an enzyme immunosensing  
4 technique on the Abbott ARCHITECT c4000 autoanalyser.  
5  
6  
7

## 8 **Data collection and outcome measures**

9  
10 A electronic case report form (eCRF) has been designed using MACRO Electronic Data Capture by  
11 Elsevier. This eCRF will included all the variables described and also concomitant medication and  
12 other clinical and demographic condition that could interfere with voriconazol This system will  
13 anonymise patients, and the data will be transferred to a '\*.csv' file in order to analyse it with R  
14 software (3.5.2 version or newer). To ensure the quality of the data, Data management will be  
15 performed by the Spanish Clinical Research Network (SCReN). Data management plan have been  
16 approved by the principal investigator and the sponsor. Data collection forms will be included in the  
17 final report.  
18  
19  
20  
21  
22  
23

## 24 **Sample size calculation**

25  
26  
27 In routine clinical practice, 43% of patients have voriconazole serum levels in the therapeutic range  
28 on the fifth day of treatment. We expect this to improve to 68%, based on the Hicks article [9]. With  
29 a two-tailed type I error of 0.05 and 80% power, it is necessary to recruit 62 patients to receive  
30 treatment in both arms. 85 out of every 100 patients recruited are estimated to will receive  
31 voriconazole, we will need a total of 146 patients from whom we obtain informed consent. This  
32 calculation has been performed with the 'power.prop.test' package, from R version 3.2.0. The  
33 necessary time to recruit the whole group is estimated to be 2 years. We estimate 20% of the patients  
34 will be selected from the La Princesa University Hospital Adult Haematology Department, and 20%  
35 from the Gomez-Ulla University Hospital Adult Haematology Department. The rest of group will be  
36 recruited from La Paz University Hospital. Since it is a phase IV clinical trial including patients that  
37 are usually followed in the hospital, with pragmatic selection criteria, it is not necessary to plan any  
38 strategy for achieving adequate participant enrolment.  
39  
40  
41  
42  
43  
44  
45  
46

## 47 **Statistical analysis**

48  
49 Frequency results will be expressed in absolute terms, as percentages and confidence intervals.  
50 Continuous variables will be expressed as mean (SD) and median (range) according to Kolmogorov  
51 Smirnov's test of normality.  
52  
53  
54  
55

56 For the main dichotomous variable (level of voriconazole within the therapeutic range) a generalised  
57 logistic model will be used. After that, "elastic net" techniques will be employed with the purpose of  
58 selecting variables so that they are not as rigid as in Lasso's case. Variables with some degree of  
59 correlation between themselves will be accepted in the model, as in Ridge regression, aiming at the  
60

1  
2 best possible predictive model. Finally, more advanced methods of statistical learning will be used  
3 to give the variables consistency by the method described above. Predictive ability will be calculated  
4 using receiver operating characteristic curves both at a specific time and over the course of the  
5 patient's follow-up.  
6  
7

8  
9 A survival analysis will be performed for the secondary variables to test the Cox proportional hazards  
10 model and the Weibull model, analysing the time until the first event, using Kaplan Meier curves. A  
11 penalised Cox regression will be fitted to determine whether there are differences from the start of  
12 the target drug to the appearance of the event (secondary variable) between the control group and  
13 the experimental group, and finally, if possible the Weibull model will be used. A cross-validation  
14 approach will be used, dividing the sample into k subgroups. Later, a subgroup analysis will be  
15 performed taking into consideration the recruiting centre, calculating the *a posteriori* analysis power  
16 of every objective, given that this can be a source of hypothesis generation for future research lines.  
17  
18

19  
20 The analysis of the primary variable of efficacy will be made on an intention-to-treat (ITT) basis. It  
21 will include all the patients who are randomized, whether they have received the study treatment or  
22 not. The safety analyses will be held in the safety population, which includes patients who receive at  
23 least one dose of the drug during the study. No interim analysis or stopping rules will be carry out in  
24 this clinical trial.  
25  
26

27  
28 A bilateral significance level of 0.05 and bilateral 95% confidence intervals will be assumed. The  
29 statistical software R (R Core Team [2014]) will be used. R: A language and environment for  
30 statistical computing. R Foundation for Statistical Computing, Vienna, Austria.  
31  
32

### 33 **Economic evaluation**

34  
35  
36  
37

38  
39 A Spanish National Healthcare Service (NHS) point-of-view cost-effectiveness evaluation will be  
40 performed. Direct cost calculations for each arm will be performed.  
41  
42

43  
44 Direct costs will be calculated for both alternatives by registering healthcare resources used during  
45 the follow-up and the unit cost per patient, as well as the costs incurred by the centres to implement  
46 the intervention.  
47  
48

49  
50 The use of resources and their unit costs, such as doctor's visits, medications and any interventions  
51 performed on those patients in the hospital during follow-up shall be recorded. Costs for each patient  
52 for each intervention group will be totalled. This calculation will allow us to compare the average cost  
53 per event avoided between the intervention group and the control group. The results will be  
54 expressed in cost per event and avoided events. As far as possible, the utility of each intervention  
55 should be calculated.  
56  
57  
58  
59  
60

1  
2 A univariate and a probabilistic sensitivity analysis will be performed to assess the uncertainty about  
3 the model and the unit costs, if they are obtained from a source other than the clinical centres.  
4  
5

## 6 **Data monitoring**

7

8  
9 Coordination, management, monitoring, data management and statistical analysis of the study will  
10 be performed by the Spanish Clinical Research Network (SCReN).  
11  
12

## 13 **Auditing**

14

15  
16 During the progress of the study, audit visits can be conducted at the participating centres. The  
17 investigator will allow direct access to the source data/documents for monitoring, auditing, review by  
18 the ethical research committee and inspection by the Health Authorities  
19  
20  
21

## 22 **Conflicts of Interest**

23

24  
25 The Funders and Sponsor not interfere in the selection processes of the patients, analysis of the  
26 data and/or publication of the results, or any other process that might come into play with the results  
27 of the study. Funding will be independent of the results of the study. The Principal Investigator has  
28 ultimate authority over any of these activities.  
29  
30  
31

## 32 **Patient and Public Involvement**

33

34  
35 The development of the research question and outcome measures were based on the oncologists'  
36 experience treating this profile of patients the desire to optimize voriconazol treatment. Patients and  
37 patient advisers were not involved in the design, recruitment or conduct of this study. The patients  
38 or their families will be notified of the study results in writing and verbally, and we will invite them to  
39 help us develop our dissemination strategy.  
40  
41  
42  
43

## 44 **Access to data.**

45

46  
47 This section is included in the data sharing plan.  
48

## 49 **Dissemination policy**

50

51  
52 Outputs from this study will include journal publications, conference presentations and community  
53 reporting. Outputs will not identify participants.  
54  
55

## 56 **Ethical considerations**

57

58  
59 The researchers will adhere strictly to the provisions of this protocol and will complete the case report  
60 forms. The study will be performed according to the recommendations for clinical studies and the

1  
2 evaluation of drugs in humans, as contained in the Declaration of Helsinki (revised in successive  
3 world assemblies) and in the current Spanish and European legislation on clinical studies and patient  
4 data confidentiality. The study will follow the principles of Good Clinical Practice. This study has been  
5 approved by the Clinical Research Ethics Committee of La Paz University Hospital (Madrid, Spain)  
6 and by the Spanish Agency of Medication and Health Products, and has been registered in Eudra  
7 CT (Eudra CT: 2019-000376-41) and ClinicalTrials.gov (NCT04238884).  
8  
9

10  
11  
12 This clinical trial has been classified by the Spanish Agency for Medicines and Healthcare Products  
13 as a "low-intervention clinical trial". The additional diagnostic or monitoring procedures do not pose  
14 more than minimal additional risk or burden to the safety of the subjects compared to normal clinical.  
15  
16

17  
18 No additional use of the system for compensation shall be required from the sponsor for low-  
19 intervention clinical trials. If any possible damage that could be suffered by a subject, resulting from  
20 the use of the investigational medicinal product in accordance with the protocol of that specific clinical  
21 trial, it is covered by the applicable compensation system already in place.  
22  
23  
24

25  
26 All protocol amendments will be evaluated by the Ethics Committee and the Spanish Agency of  
27 Medication and Health Products, following the principles of Good Clinical Practice and national  
28 legislation.  
29  
30

## 31 **DISCUSSION**

32  
33  
34 Some important barriers have been detected to implementation of pharmacogenetics in usual clinical  
35 practice. The reasons detected in the literature include the difficulty of obtaining high-level evidence  
36 on genetic markers' efficacy, effectivity and efficiency, and a lack of consensus. Another problem is  
37 the absence of pharmacogenetic techniques' formation and its interpretation. We also have to  
38 consider the financial, logistic and legal limitations. Finally, there is no specific implementation  
39 strategy in clinical practice. There have been two proposed models for the implementation of  
40 pharmacogenetics biomarkers in usual clinical practice:  
41  
42  
43  
44  
45

- 46  
47 ● Case-to-case model: The decision is made individually and is based on the need for using a  
48 drug whose effectiveness or safety is modified by specific genetics variations. The limitations  
49 are the costs and the latency between sample extraction and the results obtained.  
50
- 51 ● Pre-emptive genotyping model: This alternative assesses the patient's genetic information at  
52 the very beginning, even before starting treatment. Currently, the development of arrays  
53 permits detection of a significant number of mutations in which therapeutic impact is probable  
54 or definite. Other authors have developed a similar strategy [11][12], for instance St. Jude's  
55 Hospital [13], as well as our group [14]. Rasmussen-Torvik's group has proposed the  
56 eMERGE-PGx project, in which pre-emptive pharmacogenotyping is integrated with clinical  
57 history [15].  
58  
59  
60

1  
2 In the case of voriconazole, several studies have linked CYP2C19 polymorphism to the response.  
3 In addition, some studies have shown that genotyping CYP2C19 is effective. The cost-efficiency of  
4 pre-treatment genotyping in some drugs has been already demonstrated in some articles [7];  
5 however, there is no evidence of voriconazole efficiency specifically in the Spanish NHS, or even  
6 whether voriconazole-related cytochrome genotyping is efficient in other countries [16].  
7  
8  
9

10  
11 This pragmatic clinical trial is proposed by our group to evaluate effectiveness and efficiency of pre-  
12 emptive biomarker genotyping and its interpretation by a Pharmacogenetic Unit for patients with  
13 haematological diseases and a risk of fungal infection, who are susceptible to receiving voriconazole  
14 treatment. If our hypothesis is proven, this strategy will help us improve the prevention and treatment  
15 of this infectious complication. This trial will provide information about the viability of the translation  
16 of this strategy to routine clinical practice. In addition, our pre-emptive pharmacogenetic strategy,  
17 combined with therapeutic drug monitoring, has the potential to improve efficacy and safety, with a  
18 high level of evidence [6], lowering the likelihood of AE occurrences.  
19  
20  
21  
22  
23

### 24 **Author contributions**

25  
26  
27 AMB, AJC and JFI conceived the study. JMV, IG, FAS, CA, GM, ER, JFI, AJC and AMB designed  
28 the study. DB, RC, ME, AL and MJO are responsible of the data collecting and management. JMV  
29 and IG drafted this manuscript. AMB, AJC and JFI critically revised the manuscript. JMV and IG  
30 contributed equally. The final version of the manuscript was reviewed and approved by all authors.  
31  
32  
33  
34

### 35 **Competing interests**

36  
37  
38 None declared.  
39

### 40 **Funding statement**

41  
42  
43 This clinical trial has been funded by the Instituto de Salud Carlos III (ISCIII), Minister of Innovation  
44 and Science of Spain in a competitive and public grant (Research Projects 2018, Spanish Health  
45 Research and Development Strategy). Project code: PI18/01322.  
46  
47  
48  
49  
50  
51  
52  
53  
54  
55  
56  
57  
58  
59  
60



**REFERENCES:**

- [1] Koehler P et al. Epidemiology of invasive aspergillosis and azole resistance in patients with acute leukaemia: the SEPIA Study. *Int J Antimicrob Agents*. 2017 Feb;49(2):218-223. doi: 10.1016/j.ijantimicag.2016.10.019
- [2] Lestrade PP et al. Epidemiology of invasive aspergillosis and triazole-resistant *Aspergillus fumigatus* in patients with haematological malignancies: a single-centre retrospective cohort study. *J Antimicrob Chemother*. 2018 Jan 31. doi: 10.1093/jac/dkx527
- [3] Pagano L et al. The epidemiology of fungal infections in patients with hematologic malignancies: the SEIFEM-2004 study. *Haematologica*. 2006 Aug;91(8):1068-75.
- [4] Fortún J et al. Recomendaciones sobre el tratamiento de la enfermedad fúngica invasiva por *Aspergillus* spp. y otros hongos filamentosos de la Sociedad Española de Enfermedades Infecciosas y Microbiología Clínica (SEIMC). Actualización 2011. *Enferm Infecc Microbiol Clin*. 2011;29(6):435-454
- [5] Patterson TF et al. Practice Guidelines for the Diagnosis and Management of Aspergillosis: 2016 Update by the Infectious Diseases Society of America. *CID* 2016:63
- [6] Ashbee HR et al. Therapeutic drug monitoring (TDM) of antifungal agents: guidelines from the British Society for Medical Mycology. *J Antimicrob Chemother*. 2014 May;69(5):1162-76. doi: 10.1093/jac/dkt508. Epub 2013 Dec 29
- [7] Plumpton, C., Roberts, D., Pirmohamed, M. and Hughes, D. (2016). A Systematic Review of Economic Evaluations of Pharmacogenetic Testing for Prevention of Adverse Drug Reactions. *PharmacoEconomics*, 34(8), pp.771-793.
- [8] Moriyama B, et al. Clinical Pharmacogenetics Implementation Consortium (CPIC) Guidelines for CYP2C19 and Voriconazole Therapy. *Clin Pharmacol Ther*. 2016 Dec 16. doi: 10.1002/cpt.583.
- [9] Hicks JK et al. Voriconazole plasma concentrations in immunocompromised pediatric patients vary by CYP2C19 diplotypes. *Pharmacogenomics*. 2014 Jun;15(8):1065-78
- [10] Dapía I, García I, Martínez J, Arias P, Guerra P, Díaz L et al. Prediction Models for Voriconazole Pharmacokinetics Based on Pharmacogenetics: An Exploratory Study in Spanish population. *International Journal of Antimicrobial Agents*. 2019
- [11] Pulley, J.M. et al. Operational implementation of prospective genotyping for personalized medicine: the design of the Vanderbilt PREDICT project. *Clin. Pharmacol. Ther* 2012; 92:87 -95;

- 1  
2 [12] Bielinski S, Olson J, Pathak J, Weinshilboum R, Wang L, Lyke K et al. Preemptive Genotyping  
3 for Personalized Medicine: Design of the Right Drug, Right Dose, Right Time—Using Genomic Data  
4 to Individualize Treatment Protocol. *Mayo Clinic Proceedings*. 2014;89(1):25-33.  
5  
6  
7  
8 [13] Crews KR et al. Pharmacogenomics and Individualized Medicine: Translating Science Into  
9 Practice. *Clin Pharmacol Ther* 2012; 92:467-75  
10  
11  
12 [14] Borobia AM. et al (2017), Clinical Implementation of Pharmacogenetic Testing in a Hospital of  
13 the Spanish National Health System: Strategy and Experience Over 3 Years. *Clinical And*  
14 *Translational Science*. doi:10.1111/cts.12526  
15  
16  
17  
18 [15] Rasmussen-Torvik LJ et al. Design and anticipated outcomes of the eMERGE-PGx project: a  
19 multicenter pilot for preemptive pharmacogenomics in electronic health record systems. *Clin*  
20 *Pharmacol Ther*. 2014 Oct;96(4):482-9. doi: 10.1038/clpt.2014.137.  
21  
22  
23  
24 [16] García I, Carcas A, Borobia A. Strategy to effectively and efficiently implement voriconazole  
25 pharmacogenetics in clinical practice. *Pharmacogenomics*. 2020 Jun 3. doi: 10.2217/pgs-2020-  
26 0029. Online ahead of print  
27  
28  
29  
30  
31  
32  
33  
34  
35  
36  
37  
38  
39  
40  
41  
42  
43  
44  
45  
46  
47  
48  
49  
50  
51  
52  
53  
54  
55  
56  
57  
58  
59  
60

| VISIT                        | Visit of selection | Visit of randomisation           | Primary outcome evaluation (visit) | Follow-up visit               | End-of-treatment visit | End-of-study visit                                  |
|------------------------------|--------------------|----------------------------------|------------------------------------|-------------------------------|------------------------|-----------------------------------------------------|
| Day of the study             | Day 0              | Maximum 3 months after selection | 5th day of treatment (+/- 1 day)   | Weekly until end of treatment | Last day of treatment  | 2 weeks later after ending treatment <sup>(1)</sup> |
| Selection criteria meeting   | X                  |                                  |                                    |                               |                        |                                                     |
| Informed Consent Signing     | X                  |                                  |                                    |                               |                        |                                                     |
| Genetic sample               | X                  |                                  |                                    |                               |                        |                                                     |
| Randomisation                |                    | X                                |                                    |                               |                        |                                                     |
| Starting treatment           |                    | X                                |                                    |                               |                        |                                                     |
| Voriconazole serum levels    |                    |                                  | X                                  | X <sup>(2)</sup>              |                        |                                                     |
| Lab analysis <sup>(3)</sup>  |                    | X                                | X                                  | X                             | X                      | X                                                   |
| Electrocardiogram            |                    | X                                | X                                  | X                             | X                      | X                                                   |
| AE <sup>(4)</sup> evaluation |                    | X                                | X                                  | X                             | X                      | X                                                   |

(1) Patients who after 3 months continue being treated, End-of-study visit will be done on the last day of third month.

(2) According to physician criteria

(3) Analysis including liver enzymes.

(4) AE (Adverse Events)

Table1. Study visits planning and study procedures.

## Figure legend

Figure 1. Study Flowchart.

Proposed reporting of the flow of trial participants.

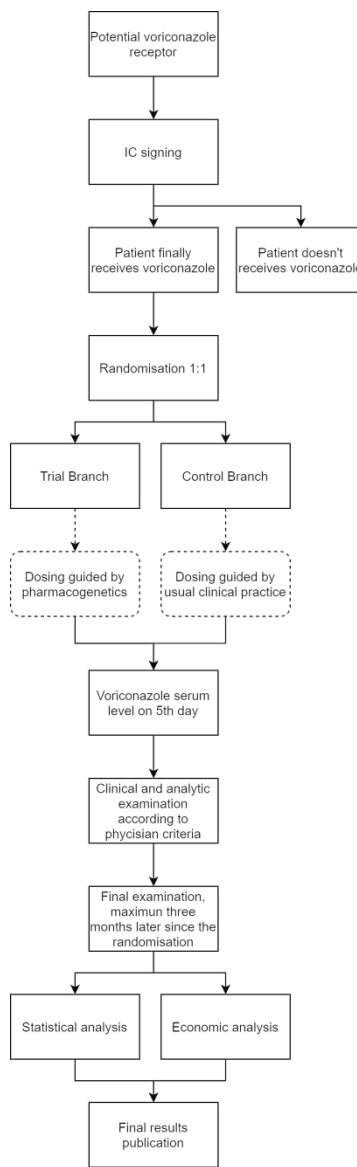

Figure 1. Study Flowchart

Figure 1. Study flowchart

## SPIRIT checklist.

| Included                            | Section/item               | Item No | Description                                                                                                                                                                                                                                                                              | Pg.    |
|-------------------------------------|----------------------------|---------|------------------------------------------------------------------------------------------------------------------------------------------------------------------------------------------------------------------------------------------------------------------------------------------|--------|
| <b>Administrative information</b>   |                            |         |                                                                                                                                                                                                                                                                                          |        |
| <input checked="" type="checkbox"/> | Title                      | 1       | Descriptive title identifying the study design, population, interventions, and, if applicable, trial acronym                                                                                                                                                                             | 1      |
| <input checked="" type="checkbox"/> | Trial registration         | 2a      | Trial identifier and registry name. If not yet registered, name of intended registry                                                                                                                                                                                                     | 1      |
| <input checked="" type="checkbox"/> |                            | 2b      | All items from the World Health Organization Trial Registration Data Set                                                                                                                                                                                                                 | 1-2    |
| <input checked="" type="checkbox"/> | Protocol version           | 3       | Date and version identifier                                                                                                                                                                                                                                                              | 1      |
| <input checked="" type="checkbox"/> | Funding                    | 4       | Sources and types of financial, material, and other support                                                                                                                                                                                                                              | 14     |
| <input checked="" type="checkbox"/> | Roles and responsibilities | 5a      | Names, affiliations, and roles of protocol contributors                                                                                                                                                                                                                                  | 16, 21 |
| <input checked="" type="checkbox"/> |                            | 5b      | Name and contact information for the trial sponsor                                                                                                                                                                                                                                       | 1      |
| <input checked="" type="checkbox"/> |                            | 5c      | Role of study sponsor and funders, if any, in study design; collection, management, analysis, and interpretation of data; writing of the report; and the decision to submit the report for publication, including whether they will have ultimate authority over any of these activities | 14     |
| <input checked="" type="checkbox"/> |                            | 5d      | Composition, roles, and responsibilities of the coordinating centre, steering committee, endpoint adjudication committee, data management team, and other individuals or groups overseeing the trial, if applicable (see Item 21a for data monitoring committee)                         | 14     |
| <b>Introduction</b>                 |                            |         |                                                                                                                                                                                                                                                                                          |        |
| <input checked="" type="checkbox"/> | Background and rationale   | 6a      | Description of research question and justification for undertaking the trial, including summary of relevant studies (published and unpublished) examining benefits and harms for each intervention                                                                                       | 6, 7   |
| <input checked="" type="checkbox"/> |                            | 6b      | Explanation for choice of comparators                                                                                                                                                                                                                                                    | 6, 7   |
| <input checked="" type="checkbox"/> | Objectives                 | 7       | Specific objectives or hypotheses                                                                                                                                                                                                                                                        | 8      |

|    |                                                           |                      |     |                                                                                                                                                                                                                                                                                                                                                                                |            |
|----|-----------------------------------------------------------|----------------------|-----|--------------------------------------------------------------------------------------------------------------------------------------------------------------------------------------------------------------------------------------------------------------------------------------------------------------------------------------------------------------------------------|------------|
| 1  | <input checked="" type="checkbox"/>                       | Trial design         | 8   | Description of trial design including type of trial (eg, parallel group, crossover, factorial, single group), allocation ratio, and framework (eg, superiority, equivalence, noninferiority, exploratory)                                                                                                                                                                      | 7          |
| 2  |                                                           |                      |     |                                                                                                                                                                                                                                                                                                                                                                                |            |
| 3  |                                                           |                      |     |                                                                                                                                                                                                                                                                                                                                                                                |            |
| 4  |                                                           |                      |     |                                                                                                                                                                                                                                                                                                                                                                                |            |
| 5  |                                                           |                      |     |                                                                                                                                                                                                                                                                                                                                                                                |            |
| 6  |                                                           |                      |     |                                                                                                                                                                                                                                                                                                                                                                                |            |
| 7  | <b>Methods: Participants, interventions, and outcomes</b> |                      |     |                                                                                                                                                                                                                                                                                                                                                                                | <b>Pg.</b> |
| 8  |                                                           |                      |     |                                                                                                                                                                                                                                                                                                                                                                                |            |
| 9  | <input checked="" type="checkbox"/>                       | Study setting        | 9   | Description of study settings (eg, community clinic, academic hospital) and list of countries where data will be collected. Reference to where list of study sites can be obtained                                                                                                                                                                                             | 8, 12      |
| 10 |                                                           |                      |     |                                                                                                                                                                                                                                                                                                                                                                                |            |
| 11 | <input checked="" type="checkbox"/>                       | Eligibility criteria | 10  | Inclusion and exclusion criteria for participants. If applicable, eligibility criteria for study centres and individuals who will perform the interventions (eg, surgeons, psychotherapists)                                                                                                                                                                                   | 8          |
| 12 |                                                           |                      |     |                                                                                                                                                                                                                                                                                                                                                                                |            |
| 13 | <input checked="" type="checkbox"/>                       | Interventions        | 11a | Interventions for each group with sufficient detail to allow replication, including how and when they will be administered                                                                                                                                                                                                                                                     | 10, 11     |
| 14 |                                                           |                      |     |                                                                                                                                                                                                                                                                                                                                                                                |            |
| 15 | <input checked="" type="checkbox"/>                       |                      | 11b | Criteria for discontinuing or modifying allocated interventions for a given trial participant (eg, drug dose change in response to harms, participant request, or improving/worsening disease)                                                                                                                                                                                 | 11         |
| 16 |                                                           |                      |     |                                                                                                                                                                                                                                                                                                                                                                                |            |
| 17 | <input checked="" type="checkbox"/>                       |                      | 11c | Strategies to improve adherence to intervention protocols, and any procedures for monitoring adherence (eg, drug tablet return, laboratory tests)                                                                                                                                                                                                                              | 11, 12     |
| 18 |                                                           |                      |     |                                                                                                                                                                                                                                                                                                                                                                                |            |
| 19 | <input checked="" type="checkbox"/>                       |                      | 11d | Relevant concomitant care and interventions that are permitted or prohibited during the trial                                                                                                                                                                                                                                                                                  | 7, 12, 16  |
| 20 |                                                           |                      |     |                                                                                                                                                                                                                                                                                                                                                                                |            |
| 21 | <input checked="" type="checkbox"/>                       | Outcomes             | 12  | Primary, secondary, and other outcomes, including the specific measurement variable (eg, systolic blood pressure), analysis metric (eg, change from baseline, final value, time to event), method of aggregation (eg, median, proportion), and time point for each outcome. Explanation of the clinical relevance of chosen efficacy and harm outcomes is strongly recommended | 9, 10      |
| 22 |                                                           |                      |     |                                                                                                                                                                                                                                                                                                                                                                                |            |
| 23 | <input checked="" type="checkbox"/>                       | Participant timeline | 13  | Time schedule of enrolment, interventions (including any run-ins and washouts), assessments, and visits for participants. A schematic diagram is highly recommended (see Figure)                                                                                                                                                                                               | 10,11,20   |
| 24 |                                                           |                      |     |                                                                                                                                                                                                                                                                                                                                                                                |            |
| 25 |                                                           |                      |     |                                                                                                                                                                                                                                                                                                                                                                                |            |
| 26 |                                                           |                      |     |                                                                                                                                                                                                                                                                                                                                                                                |            |
| 27 |                                                           |                      |     |                                                                                                                                                                                                                                                                                                                                                                                |            |
| 28 |                                                           |                      |     |                                                                                                                                                                                                                                                                                                                                                                                |            |
| 29 |                                                           |                      |     |                                                                                                                                                                                                                                                                                                                                                                                |            |
| 30 |                                                           |                      |     |                                                                                                                                                                                                                                                                                                                                                                                |            |
| 31 |                                                           |                      |     |                                                                                                                                                                                                                                                                                                                                                                                |            |
| 32 |                                                           |                      |     |                                                                                                                                                                                                                                                                                                                                                                                |            |
| 33 |                                                           |                      |     |                                                                                                                                                                                                                                                                                                                                                                                |            |
| 34 |                                                           |                      |     |                                                                                                                                                                                                                                                                                                                                                                                |            |
| 35 |                                                           |                      |     |                                                                                                                                                                                                                                                                                                                                                                                |            |
| 36 |                                                           |                      |     |                                                                                                                                                                                                                                                                                                                                                                                |            |
| 37 |                                                           |                      |     |                                                                                                                                                                                                                                                                                                                                                                                |            |
| 38 |                                                           |                      |     |                                                                                                                                                                                                                                                                                                                                                                                |            |
| 39 |                                                           |                      |     |                                                                                                                                                                                                                                                                                                                                                                                |            |
| 40 |                                                           |                      |     |                                                                                                                                                                                                                                                                                                                                                                                |            |
| 41 |                                                           |                      |     |                                                                                                                                                                                                                                                                                                                                                                                |            |
| 42 |                                                           |                      |     |                                                                                                                                                                                                                                                                                                                                                                                |            |
| 43 |                                                           |                      |     |                                                                                                                                                                                                                                                                                                                                                                                |            |
| 44 |                                                           |                      |     |                                                                                                                                                                                                                                                                                                                                                                                |            |
| 45 |                                                           |                      |     |                                                                                                                                                                                                                                                                                                                                                                                |            |
| 46 |                                                           |                      |     |                                                                                                                                                                                                                                                                                                                                                                                |            |
| 47 |                                                           |                      |     |                                                                                                                                                                                                                                                                                                                                                                                |            |
| 48 |                                                           |                      |     |                                                                                                                                                                                                                                                                                                                                                                                |            |
| 49 |                                                           |                      |     |                                                                                                                                                                                                                                                                                                                                                                                |            |
| 50 |                                                           |                      |     |                                                                                                                                                                                                                                                                                                                                                                                |            |
| 51 |                                                           |                      |     |                                                                                                                                                                                                                                                                                                                                                                                |            |
| 52 |                                                           |                      |     |                                                                                                                                                                                                                                                                                                                                                                                |            |
| 53 |                                                           |                      |     |                                                                                                                                                                                                                                                                                                                                                                                |            |
| 54 |                                                           |                      |     |                                                                                                                                                                                                                                                                                                                                                                                |            |
| 55 |                                                           |                      |     |                                                                                                                                                                                                                                                                                                                                                                                |            |
| 56 |                                                           |                      |     |                                                                                                                                                                                                                                                                                                                                                                                |            |
| 57 |                                                           |                      |     |                                                                                                                                                                                                                                                                                                                                                                                |            |
| 58 |                                                           |                      |     |                                                                                                                                                                                                                                                                                                                                                                                |            |
| 59 |                                                           |                      |     |                                                                                                                                                                                                                                                                                                                                                                                |            |
| 60 |                                                           |                      |     |                                                                                                                                                                                                                                                                                                                                                                                |            |

|    |                                                                     |                                  |     |                                                                                                                                                                                                                                                                                                                                                                                                              |               |
|----|---------------------------------------------------------------------|----------------------------------|-----|--------------------------------------------------------------------------------------------------------------------------------------------------------------------------------------------------------------------------------------------------------------------------------------------------------------------------------------------------------------------------------------------------------------|---------------|
| 1  | <input checked="" type="checkbox"/>                                 | Sample size                      | 14  | Estimated number of participants needed to achieve study objectives and how it was determined, including clinical and statistical assumptions supporting any sample size calculations                                                                                                                                                                                                                        | 12            |
| 2  |                                                                     |                                  |     |                                                                                                                                                                                                                                                                                                                                                                                                              |               |
| 3  | <input checked="" type="checkbox"/>                                 | Recruitment                      | 15  | Strategies for achieving adequate participant enrolment to reach target sample size                                                                                                                                                                                                                                                                                                                          | 12            |
| 4  |                                                                     |                                  |     |                                                                                                                                                                                                                                                                                                                                                                                                              |               |
| 5  |                                                                     |                                  |     |                                                                                                                                                                                                                                                                                                                                                                                                              |               |
| 6  |                                                                     |                                  |     |                                                                                                                                                                                                                                                                                                                                                                                                              |               |
| 7  |                                                                     |                                  |     |                                                                                                                                                                                                                                                                                                                                                                                                              |               |
| 8  |                                                                     |                                  |     |                                                                                                                                                                                                                                                                                                                                                                                                              |               |
| 9  |                                                                     |                                  |     |                                                                                                                                                                                                                                                                                                                                                                                                              |               |
| 10 |                                                                     |                                  |     |                                                                                                                                                                                                                                                                                                                                                                                                              |               |
| 11 | <b>Methods: Assignment of interventions (for controlled trials)</b> |                                  |     |                                                                                                                                                                                                                                                                                                                                                                                                              |               |
| 12 | Allocation:                                                         |                                  |     |                                                                                                                                                                                                                                                                                                                                                                                                              |               |
| 13 |                                                                     |                                  |     |                                                                                                                                                                                                                                                                                                                                                                                                              |               |
| 14 | <input checked="" type="checkbox"/>                                 | Sequence generation              | 16a | Method of generating the allocation sequence (eg, computer-generated random numbers), and list of any factors for stratification. To reduce predictability of a random sequence, details of any planned restriction (eg, blocking) should be provided in a separate document that is unavailable to those who enrol participants or assign interventions                                                     | 9             |
| 15 |                                                                     |                                  |     |                                                                                                                                                                                                                                                                                                                                                                                                              |               |
| 16 | <input checked="" type="checkbox"/>                                 | Allocation concealment mechanism | 16b | Mechanism of implementing the allocation sequence (eg, central telephone; sequentially numbered, opaque, sealed envelopes), describing any steps to conceal the sequence until interventions are assigned                                                                                                                                                                                                    | 9             |
| 17 |                                                                     |                                  |     |                                                                                                                                                                                                                                                                                                                                                                                                              |               |
| 18 | <input checked="" type="checkbox"/>                                 | Implementation                   | 16c | Who will generate the allocation sequence, who will enrol participants, and who will assign participants to interventions                                                                                                                                                                                                                                                                                    | 9, 10, 11, 21 |
| 19 |                                                                     |                                  |     |                                                                                                                                                                                                                                                                                                                                                                                                              |               |
| 20 | <input checked="" type="checkbox"/>                                 | Blinding (masking)               | 17a | Who will be blinded after assignment to interventions (eg, trial participants, care providers, outcome assessors, data analysts), and how                                                                                                                                                                                                                                                                    | 9             |
| 21 |                                                                     |                                  |     |                                                                                                                                                                                                                                                                                                                                                                                                              |               |
| 22 | <input checked="" type="checkbox"/>                                 |                                  | 17b | If blinded, circumstances under which unblinding is permissible, and procedure for revealing a participant's allocated intervention during the trial                                                                                                                                                                                                                                                         | 9             |
| 23 |                                                                     |                                  |     |                                                                                                                                                                                                                                                                                                                                                                                                              |               |
| 24 |                                                                     |                                  |     |                                                                                                                                                                                                                                                                                                                                                                                                              |               |
| 25 |                                                                     |                                  |     |                                                                                                                                                                                                                                                                                                                                                                                                              |               |
| 26 |                                                                     |                                  |     |                                                                                                                                                                                                                                                                                                                                                                                                              |               |
| 27 |                                                                     |                                  |     |                                                                                                                                                                                                                                                                                                                                                                                                              |               |
| 28 |                                                                     |                                  |     |                                                                                                                                                                                                                                                                                                                                                                                                              |               |
| 29 |                                                                     |                                  |     |                                                                                                                                                                                                                                                                                                                                                                                                              |               |
| 30 |                                                                     |                                  |     |                                                                                                                                                                                                                                                                                                                                                                                                              |               |
| 31 |                                                                     |                                  |     |                                                                                                                                                                                                                                                                                                                                                                                                              |               |
| 32 |                                                                     |                                  |     |                                                                                                                                                                                                                                                                                                                                                                                                              |               |
| 33 |                                                                     |                                  |     |                                                                                                                                                                                                                                                                                                                                                                                                              |               |
| 34 |                                                                     |                                  |     |                                                                                                                                                                                                                                                                                                                                                                                                              |               |
| 35 |                                                                     |                                  |     |                                                                                                                                                                                                                                                                                                                                                                                                              |               |
| 36 |                                                                     |                                  |     |                                                                                                                                                                                                                                                                                                                                                                                                              |               |
| 37 |                                                                     |                                  |     |                                                                                                                                                                                                                                                                                                                                                                                                              |               |
| 38 |                                                                     |                                  |     |                                                                                                                                                                                                                                                                                                                                                                                                              |               |
| 39 |                                                                     |                                  |     |                                                                                                                                                                                                                                                                                                                                                                                                              |               |
| 40 |                                                                     |                                  |     |                                                                                                                                                                                                                                                                                                                                                                                                              |               |
| 41 |                                                                     |                                  |     |                                                                                                                                                                                                                                                                                                                                                                                                              |               |
| 42 |                                                                     |                                  |     |                                                                                                                                                                                                                                                                                                                                                                                                              |               |
| 43 |                                                                     |                                  |     |                                                                                                                                                                                                                                                                                                                                                                                                              |               |
| 44 |                                                                     |                                  |     |                                                                                                                                                                                                                                                                                                                                                                                                              |               |
| 45 |                                                                     |                                  |     |                                                                                                                                                                                                                                                                                                                                                                                                              |               |
| 46 |                                                                     |                                  |     |                                                                                                                                                                                                                                                                                                                                                                                                              |               |
| 47 |                                                                     |                                  |     |                                                                                                                                                                                                                                                                                                                                                                                                              |               |
| 48 |                                                                     |                                  |     |                                                                                                                                                                                                                                                                                                                                                                                                              |               |
| 49 | <b>Methods: Data collection, management, and analysis</b>           |                                  |     |                                                                                                                                                                                                                                                                                                                                                                                                              |               |
| 50 |                                                                     |                                  |     |                                                                                                                                                                                                                                                                                                                                                                                                              |               |
| 51 | <input checked="" type="checkbox"/>                                 | Data collection methods          | 18a | Plans for assessment and collection of outcome, baseline, and other trial data, including any related processes to promote data quality (eg, duplicate measurements, training of assessors) and a description of study instruments (eg, questionnaires, laboratory tests) along with their reliability and validity, if known. Reference to where data collection forms can be found, if not in the protocol | 12            |
| 52 |                                                                     |                                  |     |                                                                                                                                                                                                                                                                                                                                                                                                              |               |
| 53 |                                                                     |                                  |     |                                                                                                                                                                                                                                                                                                                                                                                                              |               |
| 54 |                                                                     |                                  |     |                                                                                                                                                                                                                                                                                                                                                                                                              |               |
| 55 |                                                                     |                                  |     |                                                                                                                                                                                                                                                                                                                                                                                                              |               |
| 56 |                                                                     |                                  |     |                                                                                                                                                                                                                                                                                                                                                                                                              |               |
| 57 |                                                                     |                                  |     |                                                                                                                                                                                                                                                                                                                                                                                                              |               |
| 58 |                                                                     |                                  |     |                                                                                                                                                                                                                                                                                                                                                                                                              |               |
| 59 |                                                                     |                                  |     |                                                                                                                                                                                                                                                                                                                                                                                                              |               |
| 60 |                                                                     |                                  |     |                                                                                                                                                                                                                                                                                                                                                                                                              |               |

|    |                                     |                     |     |                                                                                                                                                                                                                                                                   |       |
|----|-------------------------------------|---------------------|-----|-------------------------------------------------------------------------------------------------------------------------------------------------------------------------------------------------------------------------------------------------------------------|-------|
| 1  | <input checked="" type="checkbox"/> |                     | 18b | Plans to promote participant retention and complete follow-up, including list of any outcome data to be collected for participants who discontinue or deviate from intervention protocols                                                                         | 12    |
| 2  |                                     |                     |     |                                                                                                                                                                                                                                                                   |       |
| 3  | <input checked="" type="checkbox"/> | Data management     | 19  | Plans for data entry, coding, security, and storage, including any related processes to promote data quality (eg, double data entry; range checks for data values). Reference to where details of data management procedures can be found, if not in the protocol | 12    |
| 4  |                                     |                     |     |                                                                                                                                                                                                                                                                   |       |
| 5  | <input checked="" type="checkbox"/> | Statistical methods | 20a | Statistical methods for analysing primary and secondary outcomes. Reference to where other details of the statistical analysis plan can be found, if not in the protocol                                                                                          | 12,13 |
| 6  |                                     |                     |     |                                                                                                                                                                                                                                                                   |       |
| 7  | <input checked="" type="checkbox"/> |                     | 20b | Methods for any additional analyses (eg, subgroup and adjusted analyses)                                                                                                                                                                                          | 12,13 |
| 8  |                                     |                     |     |                                                                                                                                                                                                                                                                   |       |
| 9  | <input checked="" type="checkbox"/> |                     | 20c | Definition of analysis population relating to protocol non-adherence (eg, as randomised analysis), and any statistical methods to handle missing data (eg, multiple imputation)                                                                                   | 12,13 |
| 10 |                                     |                     |     |                                                                                                                                                                                                                                                                   |       |
| 11 |                                     |                     |     |                                                                                                                                                                                                                                                                   |       |
| 12 |                                     |                     |     |                                                                                                                                                                                                                                                                   |       |
| 13 |                                     |                     |     |                                                                                                                                                                                                                                                                   |       |
| 14 |                                     |                     |     |                                                                                                                                                                                                                                                                   |       |
| 15 |                                     |                     |     |                                                                                                                                                                                                                                                                   |       |
| 16 |                                     |                     |     |                                                                                                                                                                                                                                                                   |       |
| 17 |                                     |                     |     |                                                                                                                                                                                                                                                                   |       |
| 18 |                                     |                     |     |                                                                                                                                                                                                                                                                   |       |
| 19 |                                     |                     |     |                                                                                                                                                                                                                                                                   |       |
| 20 |                                     |                     |     |                                                                                                                                                                                                                                                                   |       |
| 21 |                                     |                     |     |                                                                                                                                                                                                                                                                   |       |
| 22 |                                     |                     |     |                                                                                                                                                                                                                                                                   |       |
| 23 |                                     |                     |     |                                                                                                                                                                                                                                                                   |       |
| 24 |                                     |                     |     |                                                                                                                                                                                                                                                                   |       |
| 25 |                                     |                     |     |                                                                                                                                                                                                                                                                   |       |
| 26 |                                     |                     |     |                                                                                                                                                                                                                                                                   |       |
| 27 |                                     |                     |     |                                                                                                                                                                                                                                                                   |       |
| 28 |                                     |                     |     |                                                                                                                                                                                                                                                                   |       |
| 29 |                                     |                     |     |                                                                                                                                                                                                                                                                   |       |

|    |                                     |                 |     |                                                                                                                                                                                                                                                                                                                                       |        |
|----|-------------------------------------|-----------------|-----|---------------------------------------------------------------------------------------------------------------------------------------------------------------------------------------------------------------------------------------------------------------------------------------------------------------------------------------|--------|
| 30 | <b>Methods: Monitoring</b>          |                 |     |                                                                                                                                                                                                                                                                                                                                       |        |
| 31 |                                     |                 |     |                                                                                                                                                                                                                                                                                                                                       |        |
| 32 | <input checked="" type="checkbox"/> | Data monitoring | 21a | Composition of data monitoring committee (DMC); summary of its role and reporting structure; statement of whether it is independent from the sponsor and competing interests; and reference to where further details about its charter can be found, if not in the protocol. Alternatively, an explanation of why a DMC is not needed | 14     |
| 33 |                                     |                 |     |                                                                                                                                                                                                                                                                                                                                       |        |
| 34 | <input checked="" type="checkbox"/> |                 | 21b | Description of any interim analyses and stopping guidelines, including who will have access to these interim results and make the final decision to terminate the trial                                                                                                                                                               | 12, 13 |
| 35 |                                     |                 |     |                                                                                                                                                                                                                                                                                                                                       |        |
| 36 | <input checked="" type="checkbox"/> | Harms           | 22  | Plans for collecting, assessing, reporting, and managing solicited and spontaneously reported adverse events and other unintended effects of trial interventions or trial conduct                                                                                                                                                     | 11     |
| 37 |                                     |                 |     |                                                                                                                                                                                                                                                                                                                                       |        |
| 38 | <input checked="" type="checkbox"/> | Auditing        | 23  | Frequency and procedures for auditing trial conduct, if any, and whether the process will be independent from investigators and the sponsor                                                                                                                                                                                           | 14     |
| 39 |                                     |                 |     |                                                                                                                                                                                                                                                                                                                                       |        |
| 40 |                                     |                 |     |                                                                                                                                                                                                                                                                                                                                       |        |
| 41 |                                     |                 |     |                                                                                                                                                                                                                                                                                                                                       |        |
| 42 |                                     |                 |     |                                                                                                                                                                                                                                                                                                                                       |        |
| 43 |                                     |                 |     |                                                                                                                                                                                                                                                                                                                                       |        |
| 44 |                                     |                 |     |                                                                                                                                                                                                                                                                                                                                       |        |
| 45 |                                     |                 |     |                                                                                                                                                                                                                                                                                                                                       |        |
| 46 |                                     |                 |     |                                                                                                                                                                                                                                                                                                                                       |        |
| 47 |                                     |                 |     |                                                                                                                                                                                                                                                                                                                                       |        |
| 48 |                                     |                 |     |                                                                                                                                                                                                                                                                                                                                       |        |
| 49 |                                     |                 |     |                                                                                                                                                                                                                                                                                                                                       |        |
| 50 |                                     |                 |     |                                                                                                                                                                                                                                                                                                                                       |        |
| 51 |                                     |                 |     |                                                                                                                                                                                                                                                                                                                                       |        |
| 52 |                                     |                 |     |                                                                                                                                                                                                                                                                                                                                       |        |
| 53 |                                     |                 |     |                                                                                                                                                                                                                                                                                                                                       |        |
| 54 |                                     |                 |     |                                                                                                                                                                                                                                                                                                                                       |        |
| 55 |                                     |                 |     |                                                                                                                                                                                                                                                                                                                                       |        |
| 56 |                                     |                 |     |                                                                                                                                                                                                                                                                                                                                       |        |
| 57 |                                     |                 |     |                                                                                                                                                                                                                                                                                                                                       |        |
| 58 |                                     |                 |     |                                                                                                                                                                                                                                                                                                                                       |        |
| 59 |                                     |                 |     |                                                                                                                                                                                                                                                                                                                                       |        |
| 60 |                                     |                 |     |                                                                                                                                                                                                                                                                                                                                       |        |

|                                 |  |
|---------------------------------|--|
| <b>Ethics and dissemination</b> |  |
|---------------------------------|--|



|    |                                     |                               |     |                                                                                                                                                                                                                                                                                     |       |
|----|-------------------------------------|-------------------------------|-----|-------------------------------------------------------------------------------------------------------------------------------------------------------------------------------------------------------------------------------------------------------------------------------------|-------|
| 1  | <input checked="" type="checkbox"/> | Research ethics approval      | 24  | Plans for seeking research ethics committee/institutional review board (REC/IRB) approval                                                                                                                                                                                           | 15    |
| 2  |                                     |                               |     |                                                                                                                                                                                                                                                                                     |       |
| 3  |                                     |                               |     |                                                                                                                                                                                                                                                                                     |       |
| 4  |                                     |                               |     |                                                                                                                                                                                                                                                                                     |       |
| 5  | <input checked="" type="checkbox"/> | Protocol amendments           | 25  | Plans for communicating important protocol modifications (eg, changes to eligibility criteria, outcomes, analyses) to relevant parties (eg, investigators, REC/IRBs, trial participants, trial registries, journals, regulators)                                                    | 15    |
| 6  |                                     |                               |     |                                                                                                                                                                                                                                                                                     |       |
| 7  |                                     |                               |     |                                                                                                                                                                                                                                                                                     |       |
| 8  |                                     |                               |     |                                                                                                                                                                                                                                                                                     |       |
| 9  |                                     |                               |     |                                                                                                                                                                                                                                                                                     |       |
| 10 |                                     |                               |     |                                                                                                                                                                                                                                                                                     |       |
| 11 |                                     |                               |     |                                                                                                                                                                                                                                                                                     |       |
| 12 |                                     |                               |     |                                                                                                                                                                                                                                                                                     |       |
| 13 | <input checked="" type="checkbox"/> | Consent or assent             | 26a | Who will obtain informed consent or assent from potential trial participants or authorised surrogates, and how (see Item 32)                                                                                                                                                        | 10    |
| 14 |                                     |                               |     |                                                                                                                                                                                                                                                                                     |       |
| 15 |                                     |                               |     |                                                                                                                                                                                                                                                                                     |       |
| 16 |                                     |                               |     |                                                                                                                                                                                                                                                                                     |       |
| 17 | <input checked="" type="checkbox"/> |                               | 26b | Additional consent provisions for collection and use of participant data and biological specimens in ancillary studies, if applicable                                                                                                                                               | 9     |
| 18 |                                     |                               |     |                                                                                                                                                                                                                                                                                     |       |
| 19 |                                     |                               |     |                                                                                                                                                                                                                                                                                     |       |
| 20 |                                     |                               |     |                                                                                                                                                                                                                                                                                     |       |
| 21 |                                     |                               |     |                                                                                                                                                                                                                                                                                     |       |
| 22 | <input checked="" type="checkbox"/> | Confidentiality               | 27  | How personal information about potential and enrolled participants will be collected, shared, and maintained in order to protect confidentiality before, during, and after the trial                                                                                                | 15    |
| 23 |                                     |                               |     |                                                                                                                                                                                                                                                                                     |       |
| 24 |                                     |                               |     |                                                                                                                                                                                                                                                                                     |       |
| 25 |                                     |                               |     |                                                                                                                                                                                                                                                                                     |       |
| 26 |                                     |                               |     |                                                                                                                                                                                                                                                                                     |       |
| 27 |                                     |                               |     |                                                                                                                                                                                                                                                                                     |       |
| 28 | <input checked="" type="checkbox"/> | Declaration of interests      | 28  | Financial and other competing interests for principal investigators for the overall trial and each study site                                                                                                                                                                       | 14    |
| 29 |                                     |                               |     |                                                                                                                                                                                                                                                                                     |       |
| 30 |                                     |                               |     |                                                                                                                                                                                                                                                                                     |       |
| 31 |                                     |                               |     |                                                                                                                                                                                                                                                                                     |       |
| 32 |                                     |                               |     |                                                                                                                                                                                                                                                                                     |       |
| 33 | <input checked="" type="checkbox"/> | Access to data                | 29  | Statement of who will have access to the final trial dataset, and disclosure of contractual agreements that limit such access for investigators                                                                                                                                     | 14    |
| 34 |                                     |                               |     |                                                                                                                                                                                                                                                                                     |       |
| 35 |                                     |                               |     |                                                                                                                                                                                                                                                                                     |       |
| 36 |                                     |                               |     |                                                                                                                                                                                                                                                                                     |       |
| 37 |                                     |                               |     |                                                                                                                                                                                                                                                                                     |       |
| 38 | <input checked="" type="checkbox"/> | Ancillary and post-trial care | 30  | Provisions, if any, for ancillary and post-trial care, and for compensation to those who suffer harm from trial participation                                                                                                                                                       | 15    |
| 39 |                                     |                               |     |                                                                                                                                                                                                                                                                                     |       |
| 40 |                                     |                               |     |                                                                                                                                                                                                                                                                                     |       |
| 41 |                                     |                               |     |                                                                                                                                                                                                                                                                                     |       |
| 42 |                                     |                               |     |                                                                                                                                                                                                                                                                                     |       |
| 43 | <input checked="" type="checkbox"/> | Dissemination policy          | 31a | Plans for investigators and sponsor to communicate trial results to participants, healthcare professionals, the public, and other relevant groups (eg, via publication, reporting in results databases, or other data sharing arrangements), including any publication restrictions | 2,14  |
| 44 |                                     |                               |     |                                                                                                                                                                                                                                                                                     |       |
| 45 |                                     |                               |     |                                                                                                                                                                                                                                                                                     |       |
| 46 |                                     |                               |     |                                                                                                                                                                                                                                                                                     |       |
| 47 |                                     |                               |     |                                                                                                                                                                                                                                                                                     |       |
| 48 |                                     |                               |     |                                                                                                                                                                                                                                                                                     |       |
| 49 |                                     |                               |     |                                                                                                                                                                                                                                                                                     |       |
| 50 |                                     |                               |     |                                                                                                                                                                                                                                                                                     |       |
| 51 | <input checked="" type="checkbox"/> |                               | 31b | Authorship eligibility guidelines and any intended use of professional writers                                                                                                                                                                                                      | 16    |
| 52 |                                     |                               |     |                                                                                                                                                                                                                                                                                     |       |
| 53 |                                     |                               |     |                                                                                                                                                                                                                                                                                     |       |
| 54 | <input checked="" type="checkbox"/> |                               | 31c | Plans, if any, for granting public access to the full protocol, participant- level dataset, and statistical code                                                                                                                                                                    | 2, 14 |
| 55 |                                     |                               |     |                                                                                                                                                                                                                                                                                     |       |
| 56 |                                     |                               |     |                                                                                                                                                                                                                                                                                     |       |
| 57 |                                     |                               |     |                                                                                                                                                                                                                                                                                     |       |
| 58 |                                     |                               |     |                                                                                                                                                                                                                                                                                     |       |
| 59 | <b>Appendices</b>                   |                               |     |                                                                                                                                                                                                                                                                                     |       |
| 60 |                                     |                               |     |                                                                                                                                                                                                                                                                                     |       |

|                       |                                     |                            |    |                                                                                                                                                                                                |      |
|-----------------------|-------------------------------------|----------------------------|----|------------------------------------------------------------------------------------------------------------------------------------------------------------------------------------------------|------|
| 1<br>2<br>3<br>4      | <input checked="" type="checkbox"/> | Informed consent materials | 32 | Model consent form and other related documentation given to participants and authorised surrogates                                                                                             | *    |
| 5<br>6<br>7<br>8<br>9 | <input checked="" type="checkbox"/> | Biological specimens       | 33 | Plans for collection, laboratory evaluation, and storage of biological specimens for genetic or molecular analysis in the current trial and for future use in ancillary studies, if applicable | 9, * |

## COMMENTS:

\* Some parts of the documentation will be attached to the submission, such as the model consent form and other related documentation.

For peer review only
